# Supplementary material for: Regioselective synthesis of pyrrolo[1,2-a]imidazoles and imidazo[1,2-a]-pyridines
Source: Royal Society of Chemistry journal article supplement (doi:10.1039/c5ra04244e), 2015-01-01
Supplement: c5ra04244e1.pdf [file c5ra04244e1.pdf]

## Regioselective synthesis of pyrrolo[1,2-*a*]imidazoles and imidazo[1,2-*a*]-pyridines

Kai-Min Wang,<sup>‡</sup> Yu-Lu Ma,<sup>‡</sup> Xin-Rong Lin, Sheng-Jiao Yan,<sup>\*</sup> and Jun Lin<sup>\*</sup>

Key Laboratory of Medicinal Chemistry for Natural Resources (Yunnan University),  
Ministry of Education, School of Chemical Science and Technology, Yunnan  
University, Kunming, 650091, P. R. China

### Supporting Information

#### Table of Contents

|                                                                                                                                              |    |
|----------------------------------------------------------------------------------------------------------------------------------------------|----|
| General Information.....                                                                                                                     | 3  |
| General Procedure for the Preparation of Pyrrolo[1,2- <i>a</i> ]imidazole and Imidazo[1,2- <i>a</i> ]-pyridines Derivatives <b>5-8</b> ..... | 3  |
| Spectroscopic Data of Pyrrolo[1,2- <i>a</i> ]imidazoles <b>5-6</b> .....                                                                     | 4  |
| Spectroscopic Data of Imidazo[1,2- <i>a</i> ]-pyridines <b>7-8</b> .....                                                                     | 11 |
| X-ray Structure and Data of <b>5e</b> .....                                                                                                  | 16 |
| X-ray Structure and Data of <b>7e</b> .....                                                                                                  | 20 |
| <b>Figure 1.</b> <sup>1</sup> H NMR (400 MHz, CDCl <sub>3</sub> ) spectra of compound <b>5a</b> .....                                        | 25 |
| <b>Figure 2.</b> <sup>13</sup> C NMR (100 MHz, CDCl <sub>3</sub> ) spectra of compound <b>5a</b> .....                                       | 26 |
| <b>Figure 3.</b> <sup>1</sup> H NMR (400 MHz, CDCl <sub>3</sub> ) spectra of compound <b>5b</b> .....                                        | 27 |
| <b>Figure 4.</b> <sup>13</sup> C NMR (100 MHz, CDCl <sub>3</sub> ) spectra of compound <b>5b</b> .....                                       | 28 |
| <b>Figure 5.</b> <sup>1</sup> H NMR (400 MHz, CDCl <sub>3</sub> ) spectra of compound <b>5c</b> .....                                        | 29 |
| <b>Figure 6.</b> <sup>13</sup> C NMR (100 MHz, CDCl <sub>3</sub> ) spectra of compound <b>5c</b> .....                                       | 30 |
| <b>Figure 7.</b> <sup>1</sup> H NMR (400 MHz, CDCl <sub>3</sub> ) spectra of compound <b>5d</b> .....                                        | 31 |
| <b>Figure 8.</b> <sup>13</sup> C NMR (100 MHz, CDCl <sub>3</sub> ) spectra of compound <b>5d</b> .....                                       | 32 |
| <b>Figure 9.</b> <sup>1</sup> H NMR (400 MHz, CDCl <sub>3</sub> ) spectra of compound <b>5e</b> .....                                        | 33 |
| <b>Figure 10.</b> <sup>13</sup> C NMR (100 MHz, CDCl <sub>3</sub> ) spectra of compound <b>5e</b> .....                                      | 34 |
| <b>Figure 11.</b> <sup>1</sup> H NMR (400 MHz, CDCl <sub>3</sub> ) spectra of compound <b>5f</b> .....                                       | 35 |
| <b>Figure 12.</b> <sup>13</sup> C NMR (100 MHz, CDCl <sub>3</sub> ) spectra of compound <b>5f</b> .....                                      | 36 |
| <b>Figure 13.</b> <sup>1</sup> H NMR (400 MHz, CDCl <sub>3</sub> ) spectra of compound <b>5g</b> .....                                       | 37 |
| <b>Figure 14.</b> <sup>13</sup> C NMR (100 MHz, CDCl <sub>3</sub> ) spectra of compound <b>5g</b> .....                                      | 38 |
| <b>Figure 15.</b> <sup>1</sup> H NMR (400 MHz, CDCl <sub>3</sub> ) spectra of compound <b>5h</b> .....                                       | 39 |
| <b>Figure 16.</b> <sup>13</sup> C NMR (100 MHz, CDCl <sub>3</sub> ) spectra of compound <b>5h</b> .....                                      | 40 |
| <b>Figure 17.</b> <sup>1</sup> H NMR (400 MHz, CDCl <sub>3</sub> ) spectra of compound <b>5i</b> .....                                       | 41 |
| <b>Figure 18.</b> <sup>13</sup> C NMR (100 MHz, CDCl <sub>3</sub> ) spectra of compound <b>5i</b> .....                                      | 42 |
| <b>Figure 19.</b> <sup>1</sup> H NMR (400 MHz, CDCl <sub>3</sub> ) spectra of compound <b>5j</b> .....                                       | 43 |

<sup>\*</sup> Corresponding author. Tel.: 0086-871-5033215; fax: 0086-871-5033215; e-mail: [yansj@ynu.edu.cn](mailto:yansj@ynu.edu.cn); [linjun@ynu.edu.cn](mailto:linjun@ynu.edu.cn).

<sup>‡</sup> The two authors contributed equally to this paper.

|                                   |                                                                                     |    |
|-----------------------------------|-------------------------------------------------------------------------------------|----|
| <b>Figure 20.</b>                 | $^{13}\text{C}$ NMR (100 MHz, $\text{CDCl}_3$ ) spectra of compound <b>5j</b> ..... | 44 |
| <b>Figure 21.</b>                 | $^1\text{H}$ NMR (400 MHz, $\text{CDCl}_3$ ) spectra of compound <b>6a</b> .....    | 45 |
| <b>Figure 22.</b>                 | $^{13}\text{C}$ NMR (100 MHz, $\text{CDCl}_3$ ) spectra of compound <b>6a</b> ..... | 46 |
| <b>Figure 23.</b>                 | $^1\text{H}$ NMR (400 MHz, $\text{CDCl}_3$ ) spectra of compound <b>6b</b> .....    | 47 |
| <b>Figure 24.</b>                 | $^{13}\text{C}$ NMR (100 MHz, $\text{CDCl}_3$ ) spectra of compound <b>6b</b> ..... | 48 |
| <b>Figure 25.</b>                 | $^1\text{H}$ NMR (400 MHz, $\text{CDCl}_3$ ) spectra of compound <b>6c</b> .....    | 49 |
| <b>Figure 26.</b>                 | $^{13}\text{C}$ NMR (100 MHz, $\text{CDCl}_3$ ) spectra of compound <b>6c</b> ..... | 50 |
| <b>Figure 27.</b>                 | $^1\text{H}$ NMR (400 MHz, $\text{CDCl}_3$ ) spectra of compound <b>6d</b> .....    | 51 |
| <b>Figure 28.</b>                 | $^{13}\text{C}$ NMR (100 MHz, $\text{CDCl}_3$ ) spectra of compound <b>6d</b> ..... | 52 |
| <b>Figure 29.</b>                 | $^1\text{H}$ NMR (400 MHz, $\text{CDCl}_3$ ) spectra of compound <b>6e</b> .....    | 53 |
| <b>Figure 30.</b>                 | $^{13}\text{C}$ NMR (100 MHz, $\text{CDCl}_3$ ) spectra of compound <b>6e</b> ..... | 54 |
| <b>Figure 31.</b>                 | $^1\text{H}$ NMR (400 MHz, $\text{CDCl}_3$ ) spectra of compound <b>6f</b> .....    | 55 |
| <b>Figure 32.</b>                 | $^{13}\text{C}$ NMR (100 MHz, $\text{CDCl}_3$ ) spectra of compound <b>6f</b> ..... | 56 |
| <b>Figure 33.</b>                 | $^1\text{H}$ NMR (400 MHz, $\text{CDCl}_3$ ) spectra of compound <b>6g</b> .....    | 57 |
| <b>Figure 34.</b>                 | $^{13}\text{C}$ NMR (100 MHz, $\text{CDCl}_3$ ) spectra of compound <b>6g</b> ..... | 58 |
| <b>Figure 35.</b>                 | $^1\text{H}$ NMR (400 MHz, $\text{CDCl}_3$ ) spectra of compound <b>7a</b> .....    | 59 |
| <b>Figure 36.</b>                 | $^{13}\text{C}$ NMR (100 MHz, $\text{CDCl}_3$ ) spectra of compound <b>7a</b> ..... | 60 |
| <b>Figure 37.</b>                 | $^1\text{H}$ NMR (400 MHz, $\text{CDCl}_3$ ) spectra of compound <b>7b</b> .....    | 61 |
| <b>Figure 38.</b>                 | $^{13}\text{C}$ NMR (100 MHz, $\text{CDCl}_3$ ) spectra of compound <b>7b</b> ..... | 62 |
| <b>Figure 39.</b>                 | $^1\text{H}$ NMR (400 MHz, $\text{CDCl}_3$ ) spectra of compound <b>7c</b> .....    | 63 |
| <b>Figure 40.</b>                 | $^{13}\text{C}$ NMR (100 MHz, $\text{CDCl}_3$ ) spectra of compound <b>7c</b> ..... | 64 |
| <b>Figure 41.</b>                 | $^1\text{H}$ NMR (400 MHz, $\text{CDCl}_3$ ) spectra of compound <b>7d</b> .....    | 65 |
| <b>Figure 42.</b>                 | $^{13}\text{C}$ NMR (100 MHz, $\text{CDCl}_3$ ) spectra of compound <b>7d</b> ..... | 66 |
| <b>Figure 43.</b>                 | $^1\text{H}$ NMR (400 MHz, $\text{CDCl}_3$ ) spectra of compound <b>7e</b> .....    | 67 |
| <b>Figure 44.</b>                 | $^{13}\text{C}$ NMR (100 MHz, $\text{CDCl}_3$ ) spectra of compound <b>7e</b> ..... | 68 |
| <b>Figure 45.</b>                 | $^1\text{H}$ NMR (400 MHz, $\text{CDCl}_3$ ) spectra of compound <b>7f</b> .....    | 69 |
| <b>Figure 46.</b>                 | $^{13}\text{C}$ NMR (100 MHz, $\text{CDCl}_3$ ) spectra of compound <b>7f</b> ..... | 70 |
| <b>Figure 47.</b>                 | $^1\text{H}$ NMR (400 MHz, $\text{CDCl}_3$ ) spectra of compound <b>7g</b> .....    | 71 |
| <b>Figure 48.</b>                 | $^{13}\text{C}$ NMR (100 MHz, $\text{CDCl}_3$ ) spectra of compound <b>7g</b> ..... | 72 |
| <b>Figure 49.</b>                 | $^1\text{H}$ NMR (400 MHz, $\text{CDCl}_3$ ) spectra of compound <b>7h</b> .....    | 73 |
| <b>Figure 50.</b>                 | $^{13}\text{C}$ NMR (100 MHz, $\text{CDCl}_3$ ) spectra of compound <b>7h</b> ..... | 74 |
| <b>Figure 51.</b>                 | $^1\text{H}$ NMR (400 MHz, $\text{CDCl}_3$ ) spectra of compound <b>8a</b> .....    | 75 |
| <b>Figure 52.</b>                 | $^{13}\text{C}$ NMR (100 MHz, $\text{CDCl}_3$ ) spectra of compound <b>8a</b> ..... | 76 |
| <b>Figure 53.</b>                 | $^1\text{H}$ NMR (400 MHz, $\text{CDCl}_3$ ) spectra of compound <b>8b</b> .....    | 77 |
| <b>Figure 54.</b>                 | $^{13}\text{C}$ NMR (100 MHz, $\text{CDCl}_3$ ) spectra of compound <b>8b</b> ..... | 78 |
| <b>References and Notes</b> ..... |                                                                                     | 79 |

## General Information

All compounds were fully characterized by spectroscopic data. The NMR spectra were recorded on a Bruker DRX400 ( $^1\text{H}$ : 400 MHz,  $^{13}\text{C}$ : 100 MHz), chemical shifts ( $\delta$ ) are expressed in ppm, and  $J$  values are given in Hz, and deuterated  $\text{CDCl}_3$  was used as solvent. IR spectra were recorded on a FT-IR Thermo Nicolet Avatar 360 using KBr pellet. The reactions were monitored by thin layer chromatography (TLC) using silica gel  $\text{GF}_{254}$ . The melting points were determined on XT-4A melting point apparatus and are uncorrected. HRMs were performed on a Agilent LC/Msd TOF instrument.

The materials were purchased from Adamas-beta Corporation Limited. All chemicals and solvents were used as received without further purification unless otherwise stated. Column chromatography was performed on silica gel (200–300 mesh).

Compounds **1–3** were prepared according to the literature<sup>1</sup>. The materials **4a–4b** were purchased from Adamas-beta Corporation Limited.

## General Procedure for the Preparation of Pyrrolo[1,2-*a*]imidazole and Imidazo[1,2-*a*]-pyridines Derivatives 5–8

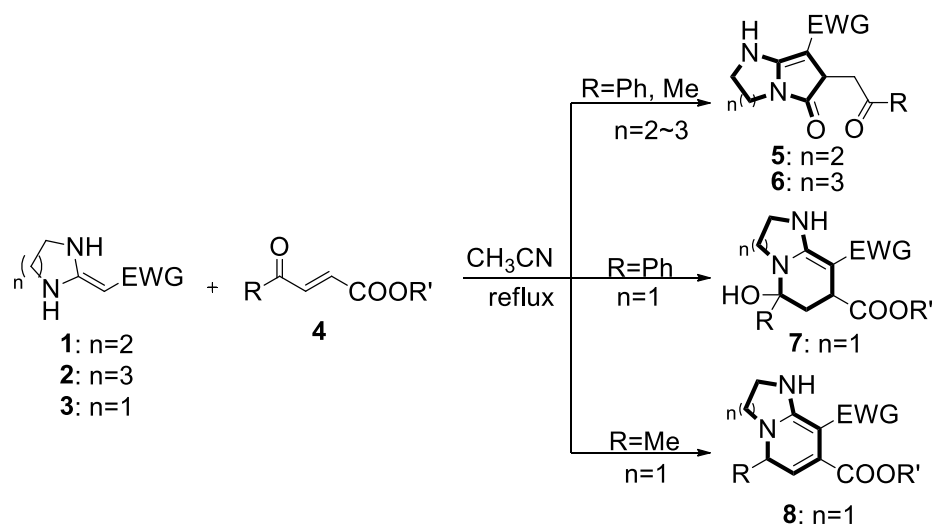

HKA derivatives **1–3** (1.0 mmol), Michael reaction acceptors **4** (1.1 mmol) and  $\text{CH}_3\text{CN}$  (10 ml) were placed into a 25 mL round-bottom flask and the mixture was stirred at reflux for 30–120 min. Completion of the reaction was monitored by TLC. The reaction mixture was then filtered to obtain the pure crude product, which was further washed with Hexane/EtOH (10:1) to give pure products **5–8** with a yield of 81–98%.

## Spectroscopic Data of Pyrrolo[1,2-*a*]imidazoles 5–6

### **8-(4-methoxybenzoyl)-7-(2-oxo-2-phenylethyl)-1,3,4,7-tetrahydropyrrolo[1,2-*a*]pyrimidin-6(2*H*)-one (5a)**

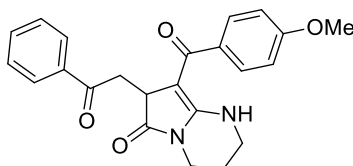

Red solid; Mp 90.5–92.9 °C; IR (KBr): 3440, 2930, 1634, 1518, 1443, 1253, 1165, 1025  $\text{cm}^{-1}$ ;  $^1\text{H}$  NMR (400 MHz,  $\text{CDCl}_3$ ):  $\delta$  = 1.99–2.06 (m, 2H,  $\text{CH}_2$ ), 3.00–3.21 (m, 2H,  $\text{COCH}_2$ ), 3.39–3.47 (m, 2H,  $\text{CH}_2\text{N}$ ), 3.55–3.70 (m, 2H,  $\text{NCH}_2$ ), 3.73 (s, 3H,  $\text{OCH}_3$ ), 3.90–3.96 (m, 1H, CH), 6.70–6.87 (m, 2H, ArH), 7.14–7.29 (m, 2H, ArH), 7.31–7.41 (m, 3H, ArH), 7.41–7.51 (m, 2H, ArH), 9.89 (br, 1H, NH);  $^{13}\text{C}$  NMR (100 MHz,  $\text{CDCl}_3$ ):  $\delta$  = 20.1, 37.3, 38.2, 38.6, 41.1, 55.3, 88.5, 113.6, 127.9, 128.3, 128.5, 133.0, 134.1, 136.5, 158.9, 160.7, 177.4, 184.0, 197.4; HRMS (TOF  $\text{ES}^+$ ):  $m/z$  calcd for  $\text{C}_{23}\text{H}_{22}\text{N}_2\text{NaO}_4$  [(M+Na) $^+$ ], 413.1472; found, 413.1469.

### **8-(4-methylbenzoyl)-7-(2-oxo-2-phenylethyl)-1,3,4,7-tetrahydropyrrolo[1,2-*a*]pyrimidin-6(2*H*)-one (5b)**

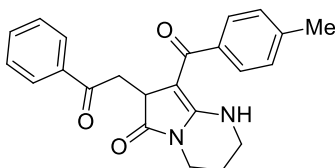

Red solid; Mp 87.9–88.5 °C; IR (KBr): 3394, 2923, 1636, 1522, 1443, 1262, 1164, 1093  $\text{cm}^{-1}$ ;  $^1\text{H}$  NMR (400 MHz,  $\text{CDCl}_3$ ):  $\delta$  = 2.03–2.09 (m, 2H,  $\text{CH}_2$ ), 2.29 (s, 3H,  $\text{ArCH}_3$ ), 2.97–3.16 (m, 2H,  $\text{COCH}_2$ ), 3.40–3.50 (m, 2H,  $\text{CH}_2\text{N}$ ), 3.61–3.74 (m, 2H,  $\text{NCH}_2$ ), 3.89–3.91 (m, 1H, CH), 7.05–7.07 (m, 2H, ArH), 7.19–7.27 (m, 4H, ArH), 7.39–7.43 (m, 3H, ArH), 9.89 (br, 1H, NH);  $^{13}\text{C}$  NMR (100 MHz,  $\text{CDCl}_3$ ):  $\delta$  = 20.1, 21.4, 37.3, 38.2, 38.6, 41.0, 88.8, 126.7, 127.9, 128.3, 129.0, 133.0, 136.5, 138.8, 139.6, 159.0, 177.5, 184.8, 197.4; HRMS (TOF  $\text{ES}^+$ ):  $m/z$  calcd for  $\text{C}_{23}\text{H}_{22}\text{N}_2\text{NaO}_3$  [(M+Na) $^+$ ], 397.1523; found, 397.1525.

### **8-benzoyl-7-(2-oxo-2-phenylethyl)-1,3,4,7-tetrahydropyrrolo[1,2-*a*]pyrimidin-6(2*H*)-one (5c)**

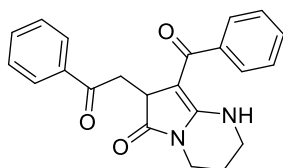

Red solid; Mp 126.4–126.9 °C; IR (KBr): 3438, 2894, 1729, 1528, 1443, 1265, 1158, 745  $\text{cm}^{-1}$ ;  $^1\text{H}$  NMR (400 MHz,  $\text{CDCl}_3$ ):  $\delta$  = 2.07–2.14 (m, 2H,  $\text{CH}_2$ ), 3.03–3.13 (m,

2H, COCH<sub>2</sub>), 3.47–3.53 (m, 2H, CH<sub>2</sub>N), 3.70–3.78 (m, 2H, NCH<sub>2</sub>), 3.92–3.94 (m, 1H, CH), 7.27–7.48 (m, 10H, ArH), 9.95 (br, 1H, NH); <sup>13</sup>C NMR (100 MHz, CDCl<sub>3</sub>): δ = 20.1, 37.3, 38.1, 38.6, 40.9, 88.8, 126.5, 127.9, 128.3, 128.4, 129.5, 133.1, 136.4, 141.7, 159.1, 177.4, 184.7, 197.3; HRMS (TOF ES<sup>+</sup>): *m/z* calcd for C<sub>22</sub>H<sub>21</sub>N<sub>2</sub>O<sub>3</sub> [(M+H)<sup>+</sup>], 361.1547; found, 361.1545.

**8-(4-chlorobenzoyl)-7-(2-oxo-2-phenylethyl)-1,3,4,7-tetrahydropyrrolo[1,2-*a*]pyrimidin-6(2*H*)-one (5d)**

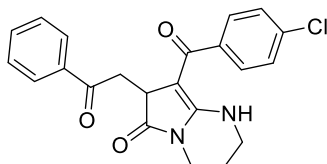

Red solid; Mp 141.9–143.0 °C; IR (KBr): 3441, 2911, 1729, 1631, 1527, 1440, 1265, 760 cm<sup>-1</sup>; <sup>1</sup>H NMR (400 MHz, CDCl<sub>3</sub>): δ = 1.98–2.07 (m, 2H, CH<sub>2</sub>), 3.00–3.13 (m, 2H, COCH<sub>2</sub>), 3.38–3.47 (m, 2H, CH<sub>2</sub>N), 3.60–3.72 (m, 2H, NCH<sub>2</sub>), 3.84–3.86 (m, 1H, CH), 7.20–7.28 (m, 4H, ArH), 7.26–7.30 (m, 2H, ArH), 7.38–7.45 (m, 3H, ArH), 9.90 (br, 1H, NH); <sup>13</sup>C NMR (100 MHz, CDCl<sub>3</sub>): δ = 20.0, 37.3, 38.2, 38.7, 40.7, 88.8, 127.8, 128.1, 128.4, 128.6, 133.2, 135.4, 136.3, 140.0, 159.4, 177.2, 183.0, 197.1; HRMS (TOF ES<sup>+</sup>): *m/z* calcd for C<sub>22</sub>H<sub>19</sub>ClN<sub>2</sub>NaO<sub>3</sub> [(M+Na)<sup>+</sup>], 417.0976; found, 417.0976.

**8-(4-fluorobenzoyl)-7-(2-oxo-2-phenylethyl)-1,3,4,7-tetrahydropyrrolo[1,2-*a*]pyrimidin-6(2*H*)-one (5e)**

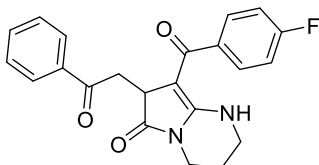

Red solid; Mp 117.6–118.7 °C; IR (KBr): 3221, 3059, 2878, 1728, 1636, 1526, 1270, 1092 cm<sup>-1</sup>; <sup>1</sup>H NMR (400 MHz, CDCl<sub>3</sub>): δ = 2.00–2.10 (m, 2H, CH<sub>2</sub>), 3.00–3.14 (m, 2H, COCH<sub>2</sub>), 3.41–3.51 (m, 2H, CH<sub>2</sub>N), 3.62–3.76 (m, 2H, NCH<sub>2</sub>), 3.85–3.88 (m, 1H, CH), 6.92–6.97 (m, 2H, ArH), 7.19–7.27 (m, 2H, ArH), 7.34–7.46 (m, 5H, ArH), 9.88 (br, 1H, NH); <sup>13</sup>C NMR (100 MHz, CDCl<sub>3</sub>): δ = 20.1, 37.3, 38.2, 38.7, 40.8, 88.7, 115.2 (*J* = 21.3 Hz), 115.5 (*J* = 21.3 Hz), 127.8, 128.4, 128.7 (*J* = 8.2 Hz), 128.8 (*J* = 8.2 Hz), 133.2, 136.3, 137.8, 159.3, 162.1 (*J* = 247.8 Hz), 164.6 (*J* = 247.8 Hz), 177.3, 183.3, 197.1; HRMS (TOF ES<sup>+</sup>): *m/z* calcd for C<sub>22</sub>H<sub>19</sub>FN<sub>2</sub>NaO<sub>3</sub> [(M+Na)<sup>+</sup>], 401.1272; found, 401.1268.

**8-nitro-7-(2-oxo-2-phenylethyl)-1,3,4,7-tetrahydropyrrolo[1,2-*a*]pyrimidin-6(2*H*)-one (5f)**

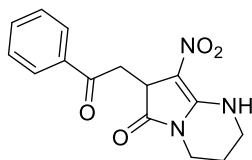

Red solid; Mp 147.4–148.1 °C; IR (KBr): 3464, 3265, 2971, 1748, 1668, 1515, 1310, 1155  $\text{cm}^{-1}$ ;  $^1\text{H}$  NMR (400 MHz,  $\text{CDCl}_3$ ):  $\delta$  = 2.00–2.13 (m, 2H,  $\text{CH}_2$ ), 3.48–3.52 (m, 2H,  $\text{COCH}_2$ ), 3.52–3.67 (m, 2H,  $\text{CH}_2\text{N}$ ), 3.72–3.78 (m, 2H,  $\text{CH}_2\text{N}$ ), 4.30–4.35 (m, 1H, CH), 7.34–7.38 (m, 2H, ArH), 7.45–7.48 (m, 1H, ArH), 7.80–7.83 (m, 2H, ArH), 9.13 (br, 1H, NH);  $^{13}\text{C}$  NMR (100 MHz,  $\text{CDCl}_3$ ):  $\delta$  = 19.4, 36.4, 37.3, 39.3, 39.9, 105.0, 128.1, 128.7, 133.6, 135.9, 154.2, 137.4, 197.5; HRMS (TOF  $\text{ES}^+$ ):  $m/z$  calcd for  $\text{C}_{15}\text{H}_{15}\text{N}_3\text{NaO}_4$  [(M+Na) $^+$ ], 324.0955; found, 324.0954.

**8-(2-chlorobenzoyl)-7-(2-oxo-2-phenylethyl)-1,3,4,7-tetrahydropyrrolo[1,2-a]pyrimidin-6(2H)-one (5g)**

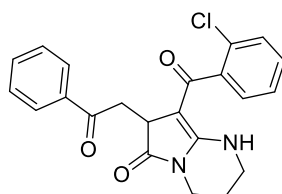

White solid; Mp 266.9–268.2 °C; IR (KBr): 3434, 3246, 2888, 1731, 1630, 1526, 1365, 1094  $\text{cm}^{-1}$ ;  $^1\text{H}$  NMR (400 MHz,  $\text{CDCl}_3$ ):  $\delta$  = 2.08–2.15 (m, 2H,  $\text{CH}_2$ ), 2.76–2.81 (m, 1H,  $\text{COCH}_2$ ), 3.02–3.08 (m, 1H,  $\text{COCH}_2$ ), 3.46–3.51 (m, 2H,  $\text{CH}_2\text{N}$ ), 3.55–3.58 (m, 1H, CH), 3.64–3.76 (m, 2H,  $\text{NCH}_2$ ), 6.97–7.05 (m, 2H, ArH), 7.15–7.30 (m, 4H, ArH), 7.42–7.45 (m, 1H, ArH), 7.49–7.52 (m, 2H, ArH), 9.63 (br, 1H, NH);  $^{13}\text{C}$  NMR (100 MHz,  $\text{CDCl}_3$ ):  $\delta$  = 20.0, 37.3, 38.1, 38.7, 39.8, 90.0, 126.9, 127.8, 128.1, 128.4, 129.6, 129.7, 130.1, 133.2, 136.1, 140.9, 158.9, 177.3, 182.7, 196.6; HRMS (TOF  $\text{ES}^+$ ):  $m/z$  calcd for  $\text{C}_{22}\text{H}_{19}\text{ClN}_2\text{NaO}_3$  [(M+Na) $^+$ ], 417.0976; found, 417.0976.

**8-(4-methylbenzoyl)-7-(2-oxopropyl)-1,3,4,7-tetrahydropyrrolo[1,2-a]pyrimidin-6(2H)-one (5h)**

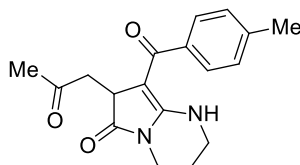

White solid; Mp 228.7–229.5 °C; IR (KBr): 3435, 2922, 1719, 1626, 1532, 1440, 1272, 1162  $\text{cm}^{-1}$ ;  $^1\text{H}$  NMR (400 MHz,  $\text{CDCl}_3$ ):  $\delta$  = 1.75 (s, 3H,  $\text{COCH}_3$ ), 1.98–2.02 (m, 2H,  $\text{CH}_2$ ), 2.30 (s, 3H,  $\text{ArCH}_3$ ), 2.37–2.43 (m, 1H,  $\text{COCH}_2$ ), 2.56–2.62 (m, 1H,  $\text{COCH}_2$ ), 3.39–3.43 (m, 2H,  $\text{CH}_2\text{N}$ ), 3.58–3.63 (m, 2H,  $\text{NCH}_2$ ), 3.72–3.75 (m, 1H, CH), 7.10–7.12 (m, 2H, ArH), 7.31–7.33 (m, 2H, ArH), 9.88 (br, 1H, NH);  $^{13}\text{C}$  NMR

(100 MHz, CDCl<sub>3</sub>):  $\delta$  = 20.1, 21.4, 30.1, 37.3, 38.6, 40.7, 42.9, 88.5, 126.6, 129.0, 138.8, 139.7, 158.8, 177.2, 184.6, 205.6; HRMS (TOF ES<sup>+</sup>):  $m/z$  calcd for C<sub>18</sub>H<sub>20</sub>N<sub>2</sub>NaO<sub>3</sub> [(M+Na)<sup>+</sup>], 335.1366; found, 335.1365.

**8-benzoyl-7-(2-oxopropyl)-1,3,4,7-tetrahydropyrrolo[1,2-*a*]pyrimidin-6(2*H*)-one (5i)**

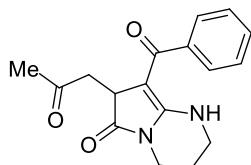

White solid; Mp 195.0–196.7 °C; IR (KBr): 3205, 3050, 2967, 1720, 1628, 1536, 1363, 1079 cm<sup>-1</sup>; <sup>1</sup>H NMR (400 MHz, CDCl<sub>3</sub>):  $\delta$  = 1.72 (s, 3H, COCH<sub>3</sub>), 1.98–2.01 (m, 2H, CH<sub>2</sub>), 2.30–2.36 (m, 1H, COCH<sub>2</sub>), 2.54–2.59 (m, 1H, COCH<sub>2</sub>), 3.38–3.43 (m, 2H, CH<sub>2</sub>N), 3.58–3.63 (m, 2H, NCH<sub>2</sub>), 3.70–3.72 (m, 1H, CH), 7.29–7.32 (m, 3H, ArH), 7.39–7.42 (m, 2H, ArH), 9.87 (br, 1H, NH); <sup>13</sup>C NMR (100 MHz, CDCl<sub>3</sub>):  $\delta$  = 20.0, 30.0, 37.2, 38.6, 40.6, 42.8, 88.7, 126.4, 128.4, 129.6, 141.6, 158.9, 177.2, 184.5, 205.6; HRMS (TOF ES<sup>+</sup>):  $m/z$  calcd for C<sub>17</sub>H<sub>18</sub>N<sub>2</sub>NaO<sub>3</sub> [(M+Na)<sup>+</sup>], 321.1210; found, 321.1210.

**8-(4-fluorobenzoyl)-7-(2-oxopropyl)-1,3,4,7-tetrahydropyrrolo[1,2-*a*]pyrimidin-6(2*H*)-one (5j)**

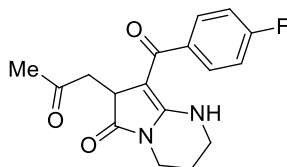

White solid; Mp 237.7–238.8 °C; IR (KBr): 3231, 3064, 2876, 1724, 1629, 1536, 1263, 1083 cm<sup>-1</sup>; <sup>1</sup>H NMR (400 MHz, CDCl<sub>3</sub>):  $\delta$  = 1.77 (s, 3H, COCH<sub>3</sub>), 2.01–2.07 (m, 2H, CH<sub>2</sub>), 2.36–2.43 (m, 1H, COCH<sub>2</sub>), 2.59–2.64 (m, 1H, COCH<sub>2</sub>), 3.42–3.47 (m, 2H, CH<sub>2</sub>N), 3.61–3.66 (m, 2H, NCH<sub>2</sub>), 3.70–3.73 (m, 1H, CH), 6.98–7.03 (m, 2H, ArH), 7.42–7.45 (m, 2H, ArH), 9.88 (br, 1H, NH); <sup>13</sup>C NMR (100 MHz, CDCl<sub>3</sub>):  $\delta$  = 20.0, 30.0, 37.3, 38.6, 40.6, 42.9, 88.5, 115.3 ( $J$  = 21.4 Hz), 115.5 ( $J$  = 21.4 Hz), 128.7 ( $J$  = 8.4 Hz), 128.8 ( $J$  = 8.4 Hz), 137.7, 159.2, 162.2 ( $J$  = 248.0 Hz), 164.6 ( $J$  = 248.0 Hz), 177.0, 183.1, 205.4; HRMS (TOF ES<sup>+</sup>):  $m/z$  calcd for C<sub>17</sub>H<sub>17</sub>FN<sub>2</sub>NaO<sub>3</sub> [(M+Na)<sup>+</sup>], 339.1115; found, 339.1115.

**9-(4-methylbenzoyl)-8-(2-oxo-2-phenylethyl)-1,2,3,4,5,8-hexahydro-7*H*-pyrrolo[1,2-*a*][1,3]diazepin-7-one (6a)**

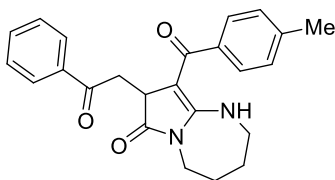

Red solid; Mp 164.0–164.9 °C; IR (KBr): 3436, 2941, 1732, 1680, 1532, 1443, 1237, 1141  $\text{cm}^{-1}$ ;  $^1\text{H}$  NMR (400 MHz,  $\text{CDCl}_3$ ):  $\delta$  = 1.99–2.09 (m, 4H,  $\text{CH}_2\text{CH}_2$ ), 2.29 (s, 3H, Ar $\text{CH}_3$ ), 2.96–3.09 (m, 2H,  $\text{COCH}_2\text{C}$ ), 3.46–3.54 (m, 2H,  $\text{CH}_2\text{N}$ ), 3.77–3.91 (m, 1H, N $\text{CH}_2$ ), 3.93–3.95 (m, 1H, CH), 3.96–4.00 (m, 1H, N $\text{CH}_2$ ), 7.05–7.07 (m, 2H, ArH), 7.20–7.25 (m, 4H, ArH), 7.38–7.44 (m, 2H, ArH), 10.71 (br, 1H, NH);  $^{13}\text{C}$  NMR (100 MHz,  $\text{CDCl}_3$ ):  $\delta$  = 21.4, 24.9, 27.4, 38.6, 41.1, 41.2, 42.7, 90.6, 126.6, 127.9, 128.3, 129.0, 133.0, 136.5, 138.9, 139.6, 165.2, 178.8, 185.0, 197.2; HRMS (TOF  $\text{ES}^+$ ):  $m/z$  calcd for  $\text{C}_{24}\text{H}_{24}\text{N}_2\text{NaO}_3$  [(M+Na) $^+$ ], 411.1679; found, 411.1679.

**9-benzoyl-8-(2-oxo-2-phenylethyl)-1,2,3,4,5,8-hexahydro-7H-pyrrolo[1,2-*a*][1,3]diazepin-7-one (6b)**

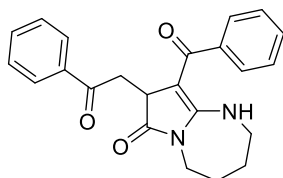

Red solid; Mp 159.4–160.9 °C; IR (KBr): 3454, 3054, 2903, 1735, 1617, 1447, 1275, 1142,  $\text{cm}^{-1}$ ;  $^1\text{H}$  NMR (400 MHz,  $\text{CDCl}_3$ ):  $\delta$  = 1.92–2.08 (m, 4H,  $\text{CH}_2\text{CH}_2$ ), 2.95–2.97 (m, 2H,  $\text{COCH}_2$ ), 3.44–3.51 (m, 2H,  $\text{CH}_2\text{N}$ ), 3.78–3.85 (m, 1H, N $\text{CH}_2$ ), 3.83–3.85 (m, 1H, CH), 3.90–3.96 (m, 1H, N $\text{CH}_2$ ), 7.18–7.30 (m, 7H, ArH), 7.30–7.40 (m, 3H, ArH), 10.71 (br, 1H, NH);  $^{13}\text{C}$  NMR (100 MHz,  $\text{CDCl}_3$ ):  $\delta$  = 24.8, 27.3, 38.5, 41.0, 41.2, 42.6, 90.5, 126.5, 127.9, 128.3, 128.4, 129.4, 133.1, 136.3, 141.8, 165.3, 178.7, 184.9, 197.1; HRMS (TOF  $\text{ES}^+$ ):  $m/z$  calcd for  $\text{C}_{23}\text{H}_{22}\text{N}_2\text{NaO}_3$  [(M+Na) $^+$ ], 397.1523; found, 397.1519.

**9-(4-chlorobenzoyl)-8-(2-oxo-2-phenylethyl)-1,2,3,4,5,8-hexahydro-7H-pyrrolo[1,2-*a*][1,3]diazepin-7-one (6c)**

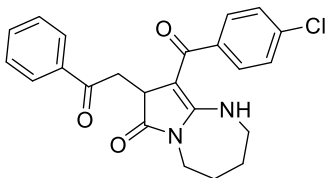

Red solid; Mp 175.9–177.4 °C; IR (KBr): 3454, 3061, 2929, 1736, 1616, 1441, 1275, 1142  $\text{cm}^{-1}$ ;  $^1\text{H}$  NMR (400 MHz,  $\text{CDCl}_3$ ):  $\delta$  = 2.00–2.19 (m, 4H,  $\text{CH}_2\text{CH}_2$ ), 3.10–3.12 (m, 2H,  $\text{COCH}_2$ ), 3.56–3.64 (m, 2H,  $\text{CH}_2\text{N}$ ), 3.87–3.93 (m, 1H, N $\text{CH}_2$ ), 3.91–3.93 (m, 1H, CH), 4.01–4.07 (m, 1H, N $\text{CH}_2$ ), 7.28–7.36 (m, 6H, ArH), 7.46–7.55 (m, 3H, ArH), 10.83 (br, 1H, NH);  $^{13}\text{C}$  NMR (100 MHz,  $\text{CDCl}_3$ ):  $\delta$  = 24.8, 27.2, 38.7, 40.9,



41.2, 42.7, 90.5, 127.9, 128.1, 128.4, 128.6, 133.2, 135.4, 136.2, 140.1, 165.6, 178.5, 183.2, 196.9; HRMS (TOF ES<sup>+</sup>): *m/z* calcd for C<sub>23</sub>H<sub>21</sub>ClN<sub>2</sub>O<sub>3</sub> [(M+Na)<sup>+</sup>], 431.1133; found, 431.1140.

**9-(4-fluorobenzoyl)-8-(2-oxo-2-phenylethyl)-1,2,3,4,5,8-hexahydro-7H-pyrrolo[1,2-*a*][1,3]diazepin-7-one (6d)**

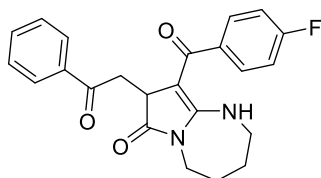

Red solid; Mp 178.3–179.0 °C; IR (KBr): 3449, 3065, 2917, 1734, 1685, 1540, 1369, 1144 cm<sup>-1</sup>; <sup>1</sup>H NMR (400 MHz, CDCl<sub>3</sub>): δ = 2.02–2.11 (m, 4H, CH<sub>2</sub>CH<sub>2</sub>), 3.01–3.02 (m, 2H, COCH<sub>2</sub>), 3.47–3.56 (m, 2H, CH<sub>2</sub>N), 3.78–3.82 (m, 1H, NCH<sub>2</sub>), 3.81–3.83 (m, 1H, CH), 3.84–3.99 (m, 1H, NCH<sub>2</sub>), 6.92–6.96 (m, 2H, ArH), 7.22–7.46 (m, 7H, ArH), 10.73 (br, 1H, NH); <sup>13</sup>C NMR (100 MHz, CDCl<sub>3</sub>): δ = 24.8, 27.3, 38.6, 40.9, 41.2, 42.6, 90.4, 115.2 (*J* = 21.3 Hz), 115.5 (*J* = 21.3 Hz), 127.8, 128.4, 128.7 (*J* = 8.3 Hz), 128.8 (*J* = 8.3 Hz), 133.2, 136.3, 137.9 (*J* = 2.6 Hz), 137.9 (*J* = 2.6 Hz), 162.0 (*J* = 247.7 Hz), 164.5 (*J* = 247.7 Hz), 165.5, 178.6, 183.4, 196.9; HRMS (TOF ES<sup>+</sup>): *m/z* calcd for C<sub>23</sub>H<sub>21</sub>FN<sub>2</sub>NaO<sub>3</sub> [(M+Na)<sup>+</sup>], 415.1428; found, 415.1429.

**9-(4-methylbenzoyl)-8-(2-oxopropyl)-1,2,3,4,5,8-hexahydro-7H-pyrrolo[1,2-*a*][1,3]diazepin-7-one (6e)**

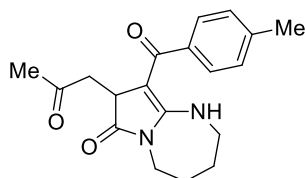

Yellow solid; Mp 202.0–203.8 °C; IR (KBr): 3445, 2940, 1722, 1618, 1541, 1437, 1265, 1151 cm<sup>-1</sup>; <sup>1</sup>H NMR (400 MHz, CDCl<sub>3</sub>): δ = 1.75 (s, 3H, COCH<sub>3</sub>), 1.87–2.06 (m, 4H, CH<sub>2</sub>CH<sub>2</sub>), 2.30 (s, 3H, ArCH<sub>3</sub>), 2.32–2.37 (m, 1H, COCH<sub>2</sub>), 2.56–2.61 (m, 1H, COCH<sub>2</sub>), 3.46–3.52 (m, 2H, CH<sub>2</sub>N), 3.71–3.73 (m, 1H, CH), 3.71–3.79 (m, 1H, NCH<sub>2</sub>), 3.87–3.93 (m, 1H, NCH<sub>2</sub>), 7.10–7.13 (m, 2H, ArH), 7.29–7.31 (m, 2H, ArH), 10.70 (br, 1H, NH); <sup>13</sup>C NMR (100 MHz, CDCl<sub>3</sub>): δ = 21.4, 24.8, 27.3, 30.0, 40.9, 41.1, 42.6, 43.2, 90.4, 126.5, 129.0, 138.9, 139.7, 165.1, 178.5, 184.9, 205.5; HRMS (TOF ES<sup>+</sup>): *m/z* calcd for C<sub>19</sub>H<sub>22</sub>N<sub>2</sub>NaO<sub>3</sub>[(M+Na)<sup>+</sup>], 349.1523; found, 349.1527.

**9-benzoyl-8-(2-oxopropyl)-1,2,3,4,5,8-hexahydro-7H-pyrrolo[1,2-*a*][1,3]diazepin-7-one (6f)**

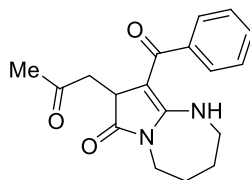

Yellow solid; Mp 169.9–170.6 °C; IR (KBr): 3445, 2933, 1723, 1619, 1543, 1444, 1262, 1148  $\text{cm}^{-1}$ ;  $^1\text{H}$  NMR (400 MHz,  $\text{CDCl}_3$ ):  $\delta$  = 1.73 (s, 3H,  $\text{COCH}_3$ ), 1.89–2.04 (m, 4H,  $\text{CH}_2\text{CH}_2$ ), 2.24–2.30 (m, 1H,  $\text{COCH}_2$ ), 2.55–2.60 (m, 1H,  $\text{COCH}_2$ ), 3.49–3.53 (m, 2H,  $\text{CH}_2\text{N}$ ), 3.68–3.69 (m, 1H, CH), 3.70–3.80 (m, 1H,  $\text{NCH}_2$ ), 3.87–3.93 (m, 1H,  $\text{NCH}_2$ ), 7.31–7.33 (m, 3H, ArH), 7.37–7.40 (m, 2H, ArH), 10.71 (br, 1H, NH);  $^{13}\text{C}$  NMR (100 MHz,  $\text{CDCl}_3$ ):  $\delta$  = 24.8, 27.3, 29.9, 40.8, 41.1, 42.6, 43.2, 90.4, 126.4, 128.5, 129.5, 141.7, 165.2, 178.5, 184.9, 205.4; HRMS (TOF  $\text{ES}^+$ ):  $m/z$  calcd for  $\text{C}_{18}\text{H}_{20}\text{N}_2\text{NaO}_3$  [(M+Na) $^+$ ], 335.1366; found, 335.1369.

**9-(4-chlorobenzoyl)-8-(2-oxopropyl)-1,2,3,4,5,8-hexahydro-7H-pyrrolo[1,2-a][1,3]diazepin-7-one (6g)**

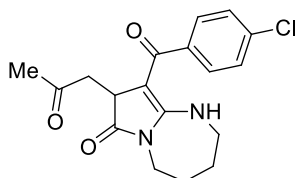

Yellow solid; Mp 242.3–243.5 °C; IR (KBr): 3452, 2943, 1727, 1619, 1543, 1267, 1152, 1089  $\text{cm}^{-1}$ ;  $^1\text{H}$  NMR (400 MHz,  $\text{CDCl}_3$ ):  $\delta$  = 1.78 (s, 3H,  $\text{COCH}_3$ ), 1.88–2.07 (m, 4H,  $\text{CH}_2\text{CH}_2$ ), 2.30–2.39 (m, 1H,  $\text{COCH}_2$ ), 2.60–2.65 (m, 1H,  $\text{COCH}_2$ ), 3.50–3.55 (m, 2H,  $\text{CH}_2\text{N}$ ), 3.67–3.69 (m, 1H, CH), 3.75–3.81 (m, 1H,  $\text{NCH}_2$ ), 3.88–3.94 (m, 1H,  $\text{NCH}_2$ ), 7.29–7.32 (m, 2H, ArH), 7.31–7.37 (m, 2H, ArH), 10.76 (br, 1H, NH);  $^{13}\text{C}$  NMR (100 MHz,  $\text{CDCl}_3$ ):  $\delta$  = 24.7, 27.2, 30.0, 40.6, 41.1, 42.6, 43.3, 90.4, 128.0, 128.7, 135.5, 140.0, 165.5, 178.3, 183.0, 205.3; HRMS (TOF  $\text{ES}^+$ ):  $m/z$  calcd for  $\text{C}_{18}\text{H}_{19}\text{ClN}_2\text{NaO}_3$  [(M+Na) $^+$ ], 369.0976; found, 369.0979.

## Spectroscopic Data of Imidazo[1,2-*a*]-pyridines 7–8

### **Ethyl 5-hydroxy-8-(4-methoxybenzoyl)-5-phenyl-1,2,3,5,6,7-hexahydroimidazo[1,2-*a*]pyridine-7-carboxylate (7a)**

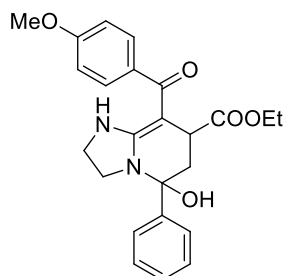

Yellow solid; Mp 80.5–81.9 °C; IR (KBr): 3427, 2971, 1729, 1599, 1384, 1247, 1168, 1027  $\text{cm}^{-1}$ ;  $^1\text{H}$  NMR (400 MHz,  $\text{CDCl}_3$ ):  $\delta$  = 0.93–0.96 (t, 3H,  $\text{CCH}_3$ ), 2.25–2.27 (m, 2H,  $\text{CH}_2$ ), 3.08–3.09 (m, 1H,  $\text{CHCO}$ ), 3.42–3.47 (m, 2H,  $\text{NCH}_2$ ), 3.50–3.53 (m, 1H,  $\text{CH}_2\text{N}$ ), 3.73 (s, 3H,  $\text{OCH}_3$ ), 3.76–3.80 (m, 1H,  $\text{CH}_2\text{N}$ ), 3.78–3.85 (q, 2H,  $\text{OCH}_2$ ), 6.19 (s, 1H, OH), 6.78–6.80 (m, 2H, ArH), 7.19–7.22 (m, 2H, ArH), 7.23–7.25 (m, 1H, ArH), 7.28–7.33 (m, 2H, ArH), 7.45–7.47 (m, 2H, ArH), 9.68 (br, 1H, NH);  $^{13}\text{C}$  NMR (100 MHz,  $\text{CDCl}_3$ ):  $\delta$  = 13.7, 39.0, 40.5, 41.8, 42.9, 55.3, 61.5, 82.3, 82.7, 113.4, 126.0, 128.1, 128.1, 128.6, 135.3, 142.6, 159.7, 161.2, 178.4, 189.9; HRMS (TOF  $\text{ES}^+$ ):  $m/z$  calcd for  $\text{C}_{24}\text{H}_{27}\text{N}_2\text{O}_5$  [(M+H) $^+$ ], 423.1914; found, 429.1914.

### **Ethyl 8-(4-ethylbenzoyl)-5-hydroxy-5-phenyl-1,2,3,5,6,7-hexahydroimidazo[1,2-*a*]pyridine-7-carboxylate (7b)**

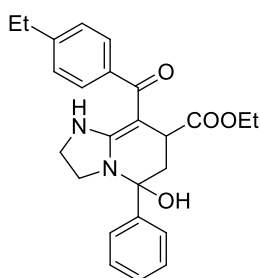

Yellow solid; Mp 91.0–91.9 °C; IR (KBr): 3291, 2968, 2353, 1728, 1599, 1512, 1387, 1169  $\text{cm}^{-1}$ ;  $^1\text{H}$  NMR (400 MHz,  $\text{CDCl}_3$ ):  $\delta$  = 0.83–0.95 (t, 3H,  $\text{CCH}_3$ ), 1.11–1.17 (t, 3H,  $\text{CCH}_3$ ), 2.19–2.30 (m, 2H,  $\text{CH}_2$ ), 2.54–2.60 (q, 2H,  $\text{ArCH}_2$ ), 3.08–3.10 (t, 1H,  $\text{CHCO}$ ), 3.42–3.53 (m, 2H,  $\text{NCH}_2$ ), 3.51–3.65 (m, 1H,  $\text{CH}_2\text{N}$ ), 3.74–3.78 (q, 2H,  $\text{OCH}_2$ ), 3.80–3.87 (m, 1H,  $\text{CH}_2\text{N}$ ), 6.16 (s, 1H, OH), 7.08–7.18 (m, 4H, ArH), 7.24–7.36 (m, 3H, ArH), 7.31–7.47 (m, 2H, ArH), 9.72 (br, 1H, NH);  $^{13}\text{C}$  NMR (100 MHz,  $\text{CDCl}_3$ ):  $\delta$  = 13.7, 15.6, 28.7, 39.0, 40.4, 41.8, 42.9, 61.4, 82.4, 82.7, 126.0, 126.4, 127.5, 128.1, 128.6, 140.1, 142.6, 144.3, 161.2, 178.5, 190.5; HRMS (TOF  $\text{ES}^+$ ):  $m/z$  calcd for  $\text{C}_{25}\text{H}_{29}\text{N}_2\text{O}_4$  [(M+H) $^+$ ], 421.2122; found, 421.2123.

**Ethyl 5-hydroxy-8-(4-methylbenzoyl)-5-phenyl-1,2,3,5,6,7-hexahydroimidazo[1,2-*a*]pyridine-7-carboxylate (7c)**

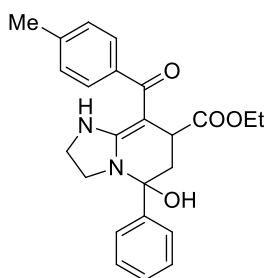

Orange solid; Mp 95.0–96.3 °C; IR (KBr): 3287, 2975, 2352, 1727, 1588, 1512, 1386, 1170  $\text{cm}^{-1}$ ;  $^1\text{H}$  NMR (400 MHz,  $\text{CDCl}_3$ ):  $\delta$  = 0.92–0.96 (t, 3H,  $\text{CCH}_3$ ), 2.24–2.25 (d, 2H,  $\text{CH}_2$ ), 2.27 (s, 3H,  $\text{CCH}_3$ ), 3.07–3.12 (m, 1H,  $\text{CHCO}$ ), 3.43–3.51 (m, 2H,  $\text{NCH}_2$ ), 3.54–3.61 (m, 1H,  $\text{CH}_2\text{N}$ ), 3.73–3.75 (q, 2H,  $\text{OCH}_2$ ), 3.79–3.87 (m, 1H,  $\text{CH}_2\text{N}$ ), 6.16 (s, 1H, OH), 7.06–7.08 (m, 2H, ArH), 7.12–7.14 (m, 2H, ArH), 7.24–7.26 (m, 1H, ArH), 7.29–7.33 (m, 2H, ArH), 7.45–7.47 (m, 2H, ArH), 9.71 (br, 1H, NH);  $^{13}\text{C}$  NMR (100 MHz,  $\text{CDCl}_3$ ):  $\delta$  = 13.7, 21.3, 39.0, 40.4, 41.8, 42.9, 61.5, 82.3, 82.7, 126.0, 126.4, 128.1, 128.6, 128.7, 138.0, 139.9, 142.6, 161.2, 178.6, 190.5; HRMS (TOF  $\text{ES}^+$ ):  $m/z$  calcd for  $\text{C}_{24}\text{H}_{26}\text{N}_2\text{NaO}_4$  [(M+Na) $^+$ ], 429.1785; found, 429.1785.

**Ethyl 8-benzoyl-5-hydroxy-5-phenyl-1,2,3,5,6,7-hexahydroimidazo[1,2-*a*]pyridine-7-carboxylate (7d)**

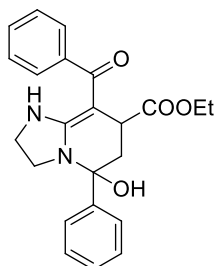

Red solid; Mp 84.9–85.7 °C; IR (KBr): 3288, 2979, 1729, 1600, 1513, 1387, 1168, 1024  $\text{cm}^{-1}$ ;  $^1\text{H}$  NMR (400 MHz,  $\text{CDCl}_3$ ):  $\delta$  = 0.91–0.94 (t, 3H,  $\text{CCH}_3$ ), 2.23–2.26 (d, 2H,  $\text{CH}_2$ ), 3.07–3.12 (m, 1H,  $\text{CHCO}$ ), 3.42–3.56 (m, 2H,  $\text{NCH}_2$ ), 3.58–3.61 (m, 1H,  $\text{CH}_2\text{N}$ ), 3.70–3.75 (q, 2H,  $\text{OCH}_2$ ), 3.77–3.87 (m, 1H,  $\text{CH}_2\text{N}$ ), 6.17 (s, 1H, OH), 7.18–7.25 (m, 6H, ArH), 7.29–7.33 (m, 2H, ArH), 7.45–7.47 (m, 2H, ArH), 9.70 (br, 1H, NH);  $^{13}\text{C}$  NMR (100 MHz,  $\text{CDCl}_3$ ):  $\delta$  = 13.7, 38.9, 40.4, 41.8, 42.9, 61.5, 82.4, 82.7, 126.0, 126.4, 128.1, 128.2, 128.3, 128.6, 142.6, 142.7, 161.3, 178.5, 190.2; HRMS (TOF  $\text{ES}^+$ ):  $m/z$  calcd for  $\text{C}_{23}\text{H}_{25}\text{N}_2\text{O}_4$  [(M+H) $^+$ ], 393.1809; found, 393.1806.

**Ethyl 8-(4-bromobenzoyl)-5-hydroxy-5-phenyl-1,2,3,5,6,7-hexahydroimidazo[1,2-*a*]pyridine-7-carboxylate (7e)**

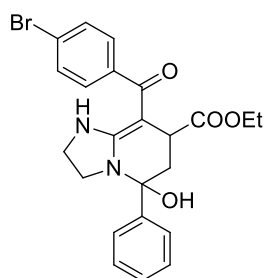

Yellow solid; Mp 200.9–202.5 °C; IR (KBr): 3295, 2974, 2887, 1694, 1591, 1515, 1398, 1226  $\text{cm}^{-1}$ ;  $^1\text{H}$  NMR (400  $\text{MHz}$ ,  $\text{CDCl}_3$ ):  $\delta$  = 0.96–0.99 (t, 3H,  $\text{CCH}_3$ ), 2.26–2.28 (d, 2H,  $\text{CH}_2$ ), 3.11–3.14 (m, 1H,  $\text{CHCO}$ ), 3.46–3.57 (m, 2H,  $\text{NCH}_2$ ), 3.59–3.70 (q, 2H,  $\text{OCH}_2$ ), 3.79–3.91 (m, 2H,  $\text{CH}_2\text{N}$ ), 6.17 (s, 1H, OH), 7.12–7.19 (m, 2H, ArH), 7.26–7.35 (m, 3H, ArH), 7.41–7.48 (m, 4H, ArH), 9.71 (br, 1H, NH);  $^{13}\text{C}$  NMR (100  $\text{MHz}$ ,  $\text{CDCl}_3$ ):  $\delta$  = 13.7, 38.8, 40.3, 41.8, 42.9, 61.7, 82.2, 82.7, 122.3, 126.0, 128.1, 128.2, 128.6, 131.3, 141.5, 142.4, 161.3, 178.4, 188.7; HRMS (TOF  $\text{ES}^+$ ):  $m/z$  calcd for  $\text{C}_{23}\text{H}_{24}\text{BrN}_2\text{O}_4$  [(M+H) $^+$ ], 471.0914; found, 471.0913.

**Ethyl 8-(4-chlorobenzoyl)-5-hydroxy-5-phenyl-1,2,3,5,6,7-hexahydroimidazo[1,2-a]pyridine-7-carboxylate (7f)**

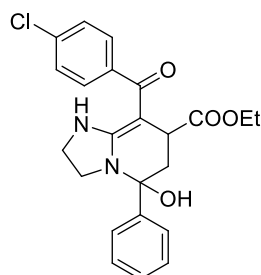

White solid; Mp 190.5–192.4 °C; IR (KBr): 3302, 2977, 2885, 1695, 1593, 1398, 1226, 1022  $\text{cm}^{-1}$ ;  $^1\text{H}$  NMR (400  $\text{MHz}$ ,  $\text{CDCl}_3$ ):  $\delta$  = 1.02–1.06 (t, 3H,  $\text{CCH}_3$ ), 2.33–2.35 (d, 2H,  $\text{CH}_2$ ), 3.17–3.22 (m, 1H,  $\text{CHCO}$ ), 3.53–3.69 (m, 2H,  $\text{NCH}_2$ ), 3.71–3.78 (q, 2H,  $\text{OCH}_2$ ), 3.86–3.98 (m, 2H,  $\text{CH}_2\text{N}$ ), 6.24 (s, 1H, OH), 7.26–7.27 (m, 3H, ArH), 7.32–7.34 (m, 2H, ArH), 7.35–7.42 (m, 2H, ArH), 7.53–7.55 (m, 2H, ArH), 9.79 (br, 1H, NH);  $^{13}\text{C}$  NMR (100  $\text{MHz}$ ,  $\text{CDCl}_3$ ):  $\delta$  = 13.7, 38.9, 40.3, 41.8, 42.9, 61.7, 82.2, 82.7, 126.0, 128.0, 128.2, 128.3, 128.6, 134.1, 141.1, 142.5, 161.3, 178.4, 188.8; HRMS (TOF  $\text{ES}^+$ ):  $m/z$  calcd for  $\text{C}_{23}\text{H}_{24}\text{ClN}_2\text{O}_4$  [(M+H) $^+$ ], 427.1419; found, 427.1417.

**Ethyl 8-(4-fluorobenzoyl)-5-hydroxy-5-phenyl-1,2,3,5,6,7-hexahydroimidazo[1,2-a]pyridine-7-carboxylate (7g)**

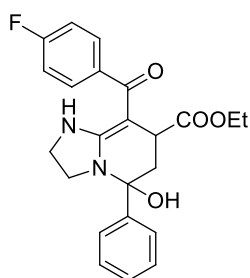

Yellow solid; Mp 115.6–117.8 °C; IR (KBr): 3256, 2976, 1730, 1590, 1510, 1381, 1162, 1026  $\text{cm}^{-1}$ ;  $^1\text{H}$  NMR (400 MHz,  $\text{CDCl}_3$ ):  $\delta$  = 0.93–0.97 (t, 3H,  $\text{CCH}_3$ ), 2.25–2.26 (d, 2H,  $\text{CH}_2$ ), 3.07–3.12 (m, 1H,  $\text{CHCO}$ ), 3.43–3.54 (m, 2H,  $\text{NCH}_2$ ), 3.56–3.69 (q, 2H,  $\text{OCH}_2$ ), 3.77–3.90 (m, 2H,  $\text{CH}_2\text{N}$ ), 6.17 (s, 1H, OH), 6.93–6.97 (m, 2H, ArH), 7.21–7.24 (m, 3H, ArH), 7.26–7.33 (m, 2H, ArH), 7.44–7.46 (m, 2H, ArH), 9.67 (br, 1H, NH);  $^{13}\text{C}$  NMR (100 MHz,  $\text{CDCl}_3$ ):  $\delta$  = 13.7, 38.9, 40.4, 41.8, 42.9, 61.6, 82.3, 82.7, 114.9 ( $J$  = 21.3 Hz), 115.1 ( $J$  = 21.3 Hz), 126.0, 128.2, 128.4 ( $J$  = 8.1 Hz), 128.5 ( $J$  = 8.1 Hz), 128.6, 138.7 ( $J$  = 2.9 Hz), 138.8 ( $J$  = 2.9 Hz), 142.5, 161.3, 161.3 ( $J$  = 249.9 Hz), 163.8 ( $J$  = 249.9 Hz), 178.3, 188.9; HRMS (TOF  $\text{ES}^+$ ):  $m/z$  calcd for  $\text{C}_{23}\text{H}_{23}\text{FN}_2\text{NaO}_4$  [(M+Na) $^+$ ], 433.1534; found, 433.1533.

**Ethyl 5-hydroxy-8-nitro-5-phenyl-1,2,3,5,6,7-hexahydroimidazo[1,2-*a*]pyridine-7-carboxylate (7h)**

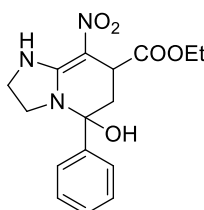

Yellow solid; Mp 193.9–194.6 °C; IR (KBr): 3335, 2978, 2354, 1684, 1501, 1253, 1129, 1018  $\text{cm}^{-1}$ ;  $^1\text{H}$  NMR (400 MHz,  $\text{CDCl}_3$ ):  $\delta$  = 1.24–1.27 (t, 3H,  $\text{CCH}_3$ ), 2.25–2.42 (m, 2H,  $\text{CH}_2$ ), 3.17–3.22 (m, 1H,  $\text{CHCO}$ ), 3.51–3.66 (m, 2H,  $\text{NCH}_2$ ), 3.70–3.73 (q, 1H,  $\text{OCH}_2$ ), 4.04–4.07 (q, 1H,  $\text{OCH}_2$ ), 4.19–4.23 (m, 2H,  $\text{CH}_2\text{N}$ ), 5.52 (s, 1H, OH), 7.28–7.36 (m, 3H, ArH), 7.44–7.46 (m, 2H, ArH), 8.87 (br, 1H, NH);  $^{13}\text{C}$  NMR (100 MHz,  $\text{CDCl}_3$ ):  $\delta$  = 13.0, 38.0, 38.3, 41.2, 43.1, 61.4, 82.4, 102.3, 124.9, 127.6, 127.7, 139.9, 156.6, 175.7; HRMS (TOF  $\text{ES}^+$ ):  $m/z$  calcd for  $\text{C}_{16}\text{H}_{19}\text{N}_3\text{NaO}_5$  [(M+Na) $^+$ ], 356.1217; found, 356.1217.

**Methyl 8-benzoyl-5-methyl-1,2,3,5-tetrahydroimidazo[1,2-*a*]pyridine-7-carboxylate (8a)**

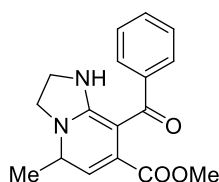

Yellow solid; Mp 200.9–201.4 °C; IR (KBr): 3234, 2954, 2897, 1739, 1530, 1473, 1157, 1014  $\text{cm}^{-1}$ ;  $^1\text{H}$  NMR (400 MHz,  $\text{CDCl}_3$ ):  $\delta$  = 1.82 (s, 3H,  $\text{CCH}_3$ ), 3.39 (s, 3H,  $\text{OCH}_3$ ), 3.65–3.78 (m, 4H,  $\text{CH}_2\text{CH}_2$ ), 4.01–4.02 (m, 1H, NCH), 4.58–4.60 (m, 1H, CCH), 7.16–7.20 (m, 2H, ArH), 7.22–7.25 (m, 3H, ArH), 9.32 (br, 1H, NH);  $^{13}\text{C}$  NMR (100 MHz,  $\text{CDCl}_3$ ):  $\delta$  = 17.0, 41.5, 41.7, 43.6, 50.8, 81.7, 98.1, 125.0, 127.1, 127.3, 132.4, 141.3, 157.3, 173.7, 191.3; HRMS (TOF  $\text{ES}^+$ ):  $m/z$  calcd for  $\text{C}_{17}\text{H}_{18}\text{N}_2\text{NaO}_3$  [(M+Na) $^+$ ], 321.1210; found, 321.1208.

**Methyl 8-(4-chlorobenzoyl)-5-methyl-1,2,3,5-tetrahydroimidazo[1,2-*a*]pyridine-7-carboxylate (8b)**

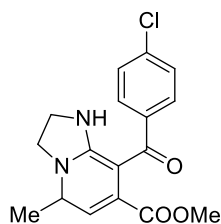

Yellow solid; Mp 180.3–181.1 °C; IR (KBr): 3236, 2898, 1733, 1605, 1472, 1328, 1223, 1090  $\text{cm}^{-1}$ ;  $^1\text{H}$  NMR (400 MHz,  $\text{CDCl}_3$ ):  $\delta$  = 1.83 (s, 3H,  $\text{CCH}_3$ ), 3.41 (s, 3H,  $\text{OCH}_3$ ), 3.65–3.78 (m, 4H,  $\text{CH}_2\text{CH}_2$ ), 3.96–3.98 (m, 1H, NCH), 4.60–4.62 (m, 1H, CCH), 7.12–7.14 (m, 2H, ArH), 7.19–7.23 (m, 3H, ArH), 9.30 (br, 1H, NH);  $^{13}\text{C}$  NMR (100 MHz,  $\text{CDCl}_3$ ):  $\delta$  = 16.9, 41.3, 41.7, 43.6, 50.9, 81.6, 98.0, 126.6, 127.3, 132.4, 133.2, 139.7, 157.4, 173.5, 189.7; HRMS (TOF  $\text{ES}^+$ ):  $m/z$  calcd for  $\text{C}_{17}\text{H}_{17}\text{ClN}_2\text{NaO}_3$  [(M+Na) $^+$ ], 355.0820; found, 355.0825.

## X-ray Structure and Data<sup>2</sup> of 5e

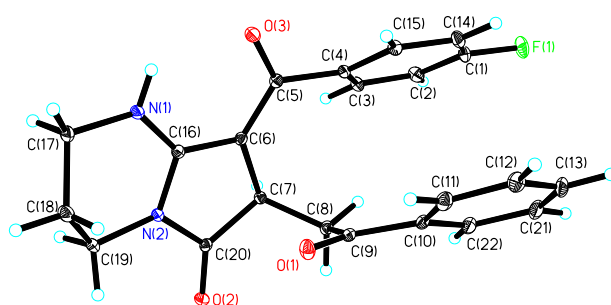

**Figure S1** X-Ray crystal structure of **5e**

**Table S1** Crystal data and structure refinement for **5e**

|                                   |                                                                                                                        |
|-----------------------------------|------------------------------------------------------------------------------------------------------------------------|
| Empirical formula                 | C <sub>23</sub> H <sub>21</sub> C <sub>12</sub> F N <sub>2</sub> O <sub>3</sub>                                        |
| Formula weight                    | 463.32                                                                                                                 |
| Temperature                       | 100(2) K                                                                                                               |
| Wavelength                        | 0.71073 Å                                                                                                              |
| Crystal system, space group       | Monoclinic, P 21/c                                                                                                     |
| Unit cell dimensions              | a = 9.9049(18) Å    alpha = 90 deg.<br>b = 24.490(4) Å    beta = 96.040(3) deg.<br>c = 8.7934(16) Å    gamma = 90 deg. |
| Volume                            | 2121.2(7) Å <sup>3</sup>                                                                                               |
| Z, Calculated density             | 4, 1.451 Mg/m <sup>3</sup>                                                                                             |
| Absorption coefficient            | 0.344 mm <sup>-1</sup>                                                                                                 |
| F(000)                            | 960                                                                                                                    |
| Crystal size                      | 1.35 x 0.40 x 0.20 mm                                                                                                  |
| Theta range for data collection   | 1.66 to 28.00 deg.                                                                                                     |
| Limiting indices                  | -13<=h<=13, -32<=k<=32, -11<=l<=11                                                                                     |
| Reflection collected/unique       | 19828 / 5114 [R(int) = 0.0344]                                                                                         |
| Completeness to theta = 28.2      | 99.9%                                                                                                                  |
| Absorption correction             | Semi-empirical from equivalents                                                                                        |
| Refinement method                 | Full-matrix least-squares on F <sup>2</sup>                                                                            |
| Data/restraints/parameters        | 5114 / 0 / 280                                                                                                         |
| Goodness-of-fit on F <sup>2</sup> | 1.034                                                                                                                  |
| Final R indices [I>2sigma(I)]     | R1 = 0.0706, wR2 = 0.1748                                                                                              |
| R indices (all data)              | R1 = 0.0869, wR2 = 0.1877                                                                                              |
| Largest diff. peak and hole       | 1.458 and -1.284 e.Å <sup>-3</sup>                                                                                     |



**Table S2** Bond lengths [Å] and angles [deg] for **5e**

---

|                  |          |
|------------------|----------|
| Cl(1)-C(23)      | 1.752(4) |
| Cl(2)-C(23)      | 1.735(4) |
| F(1)-C(1)        | 1.363(3) |
| O(1)-C(9)        | 1.220(3) |
| O(2)-C(20)       | 1.220(3) |
| O(3)-C(5)        | 1.260(3) |
| N(1)-C(16)       | 1.321(3) |
| N(1)-C(17)       | 1.460(3) |
| N(1)-H(1)        | 0.8800   |
| N(2)-C(20)       | 1.378(3) |
| N(2)-C(16)       | 1.385(3) |
| N(2)-C(19)       | 1.465(3) |
| C(1)-C(14)       | 1.377(4) |
| C(1)-C(2)        | 1.378(4) |
| C(2)-C(3)        | 1.396(3) |
| C(2)-H(2)        | 0.9500   |
| C(3)-C(4)        | 1.399(3) |
| C(3)-H(3)        | 0.9500   |
| C(4)-C(15)       | 1.393(3) |
| C(4)-C(5)        | 1.501(3) |
| C(5)-C(6)        | 1.408(3) |
| C(6)-C(16)       | 1.403(3) |
| C(6)-C(7)        | 1.517(3) |
| C(7)-C(20)       | 1.523(3) |
| C(7)-C(8)        | 1.532(3) |
| C(7)-H(7)        | 1.0000   |
| C(8)-C(9)        | 1.512(3) |
| C(8)-H(8A)       | 0.9900   |
| C(8)-H(8B)       | 0.9900   |
| C(9)-C(10)       | 1.498(3) |
| C(10)-C(11)      | 1.396(4) |
| C(10)-C(22)      | 1.397(4) |
| C(11)-C(12)      | 1.389(4) |
| C(11)-H(11)      | 0.9500   |
| C(12)-C(13)      | 1.393(4) |
| C(12)-H(12)      | 0.9500   |
| C(13)-C(21)      | 1.384(4) |
| C(13)-H(13)      | 0.9500   |
| C(14)-C(15)      | 1.389(3) |
| C(14)-H(14)      | 0.9500   |
| C(15)-H(15)      | 0.9500   |
| C(17)-C(18)      | 1.523(4) |
| C(17)-H(17A)     | 0.9900   |
| C(17)-H(17B)     | 0.9900   |
| C(18)-C(19)      | 1.521(4) |
| C(18)-H(18A)     | 0.9900   |
| C(18)-H(18B)     | 0.9900   |
| C(19)-H(19A)     | 0.9900   |
| C(19)-H(19B)     | 0.9900   |
| C(21)-C(22)      | 1.393(4) |
| C(21)-H(21)      | 0.9500   |
| C(22)-H(22)      | 0.9500   |
| C(23)-H(23A)     | 0.9900   |
| C(23)-H(23B)     | 0.9900   |
| C(16)-N(1)-C(17) | 123.2(2) |
| C(16)-N(1)-H(1)  | 118.4    |

---

---

|                   |            |
|-------------------|------------|
| C(17)-N(1)-H(1)   | 118.4      |
| C(20)-N(2)-C(16)  | 110.82(19) |
| C(20)-N(2)-C(19)  | 125.5(2)   |
| C(16)-N(2)-C(19)  | 123.5(2)   |
| F(1)-C(1)-C(14)   | 118.6(2)   |
| F(1)-C(1)-C(2)    | 118.1(2)   |
| C(14)-C(1)-C(2)   | 123.3(2)   |
| C(1)-C(2)-C(3)    | 118.2(2)   |
| C(1)-C(2)-H(2)    | 120.9      |
| C(3)-C(2)-H(2)    | 120.9      |
| C(2)-C(3)-C(4)    | 120.3(2)   |
| C(2)-C(3)-H(3)    | 119.9      |
| C(4)-C(3)-H(3)    | 119.9      |
| C(15)-C(4)-C(3)   | 119.2(2)   |
| C(15)-C(4)-C(5)   | 118.0(2)   |
| C(3)-C(4)-C(5)    | 122.8(2)   |
| O(3)-C(5)-C(6)    | 121.7(2)   |
| O(3)-C(5)-C(4)    | 117.1(2)   |
| C(6)-C(5)-C(4)    | 121.1(2)   |
| C(16)-C(6)-C(5)   | 120.7(2)   |
| C(16)-C(6)-C(7)   | 107.1(2)   |
| C(5)-C(6)-C(7)    | 131.6(2)   |
| C(6)-C(7)-C(20)   | 102.85(18) |
| C(6)-C(7)-C(8)    | 119.22(19) |
| C(20)-C(7)-C(8)   | 111.70(19) |
| C(6)-C(7)-H(7)    | 107.5      |
| C(20)-C(7)-H(7)   | 107.5      |
| C(8)-C(7)-H(7)    | 107.5      |
| C(9)-C(8)-C(7)    | 112.64(19) |
| C(9)-C(8)-H(8A)   | 109.1      |
| C(7)-C(8)-H(8A)   | 109.1      |
| C(9)-C(8)-H(8B)   | 109.1      |
| C(7)-C(8)-H(8B)   | 109.1      |
| H(8A)-C(8)-H(8B)  | 107.8      |
| O(1)-C(9)-C(10)   | 121.5(2)   |
| O(1)-C(9)-C(8)    | 120.3(2)   |
| C(10)-C(9)-C(8)   | 118.2(2)   |
| C(11)-C(10)-C(22) | 119.8(2)   |
| C(11)-C(10)-C(9)  | 118.1(2)   |
| C(22)-C(10)-C(9)  | 122.0(2)   |
| C(12)-C(11)-C(10) | 119.9(3)   |
| C(12)-C(11)-H(11) | 120.1      |
| C(10)-C(11)-H(11) | 120.1      |
| C(11)-C(12)-C(13) | 120.1(3)   |
| C(11)-C(12)-H(12) | 119.9      |
| C(13)-C(12)-H(12) | 119.9      |
| C(21)-C(13)-C(12) | 120.2(3)   |
| C(21)-C(13)-H(13) | 119.9      |
| C(12)-C(13)-H(13) | 119.9      |
| C(1)-C(14)-C(15)  | 117.8(2)   |
| C(1)-C(14)-H(14)  | 121.1      |
| C(15)-C(14)-H(14) | 121.1      |
| C(14)-C(15)-C(4)  | 121.2(2)   |
| C(14)-C(15)-H(15) | 119.4      |
| C(4)-C(15)-H(15)  | 119.4      |
| N(1)-C(16)-N(2)   | 119.5(2)   |
| N(1)-C(16)-C(6)   | 129.5(2)   |

---

|                     |            |
|---------------------|------------|
| N(2)-C(16)-C(6)     | 110.9(2)   |
| N(1)-C(17)-C(18)    | 109.8(2)   |
| N(1)-C(17)-H(17A)   | 109.7      |
| C(18)-C(17)-H(17A)  | 109.7      |
| N(1)-C(17)-H(17B)   | 109.7      |
| C(18)-C(17)-H(17B)  | 109.7      |
| H(17A)-C(17)-H(17B) | 108.2      |
| C(19)-C(18)-C(17)   | 110.3(2)   |
| C(19)-C(18)-H(18A)  | 109.6      |
| C(17)-C(18)-H(18A)  | 109.6      |
| C(19)-C(18)-H(18B)  | 109.6      |
| C(17)-C(18)-H(18B)  | 109.6      |
| H(18A)-C(18)-H(18B) | 108.1      |
| N(2)-C(19)-C(18)    | 108.4(2)   |
| N(2)-C(19)-H(19A)   | 110.0      |
| C(18)-C(19)-H(19A)  | 110.0      |
| N(2)-C(19)-H(19B)   | 110.0      |
| C(18)-C(19)-H(19B)  | 110.0      |
| H(19A)-C(19)-H(19B) | 108.4      |
| O(2)-C(20)-N(2)     | 124.6(2)   |
| O(2)-C(20)-C(7)     | 127.3(2)   |
| N(2)-C(20)-C(7)     | 108.06(19) |
| C(13)-C(21)-C(22)   | 120.0(3)   |
| C(13)-C(21)-H(21)   | 120.0      |
| C(22)-C(21)-H(21)   | 120.0      |
| C(21)-C(22)-C(10)   | 119.9(3)   |
| C(21)-C(22)-H(22)   | 120.0      |
| C(10)-C(22)-H(22)   | 120.0      |
| Cl(2)-C(23)-Cl(1)   | 111.9(2)   |
| Cl(2)-C(23)-H(23A)  | 109.2      |
| Cl(1)-C(23)-H(23A)  | 109.2      |
| Cl(2)-C(23)-H(23B)  | 109.2      |
| Cl(1)-C(23)-H(23B)  | 109.2      |
| H(23A)-C(23)-H(23B) | 107.9      |

Symmetry transformations used to generate equivalent atoms:

**Table S3.** Hydrogen bonds for **5e** [A and deg.].

| D-H...A             | d(D-H) | d(H...A) | d(D...A)  | <(DHA) |
|---------------------|--------|----------|-----------|--------|
| C(17)-H(17B)...O(3) | 0.97   | 1.98     | 2.387(12) | 102.7  |
| C(15)-H(15)...F(1)  | 0.98   | 2.51     | 2.872(4)  | 101.7  |
| O(2)-H(2)...O(5)    | 0.82   | 1.94     | 2.753(3)  | 169.6  |
| N(1)-H(1)...O(1)    | 0.86   | 2.04     | 2.607(4)  | 123.1  |

Symmetry transformations used to generate equivalent atoms:

## X-ray Structure and Data<sup>2</sup> of 7e

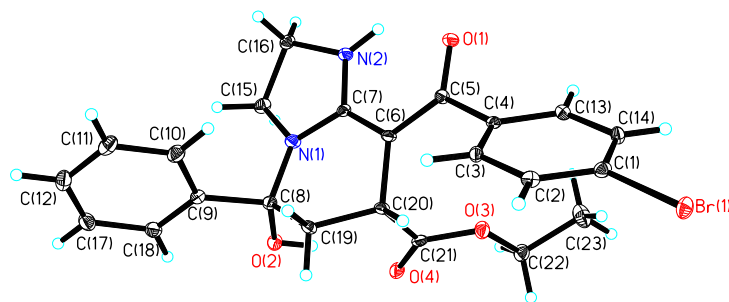

**Figure S2** X-Ray crystal structure of **7e**

**Table S4** Crystal data and structure refinement for **7e**

|                                   |                                                                                                                                          |
|-----------------------------------|------------------------------------------------------------------------------------------------------------------------------------------|
| Empirical formula                 | $C_{27}H_{25}Cl_3F_3N_3O_5$                                                                                                              |
| Formula weight                    | 634.85                                                                                                                                   |
| Temperature                       | 293(2) K                                                                                                                                 |
| Wavelength                        | 0.71073 Å                                                                                                                                |
| Crystal system, space group       | Triclinic, P-1                                                                                                                           |
| Unit cell dimensions              | $a = 10.489(5)$ Å $\alpha = 73.462(5)$ deg.<br>$b = 11.635(5)$ Å $\beta = 80.503(5)$ deg.<br>$c = 13.375(5)$ Å $\gamma = 72.854(5)$ deg. |
| Volume                            | $1489.3(11)$ Å <sup>3</sup>                                                                                                              |
| Z, Calculated density             | 2, 1.416 Mg/m <sup>3</sup>                                                                                                               |
| Absorption coefficient            | 0.367 mm <sup>-1</sup>                                                                                                                   |
| F(000)                            | 652                                                                                                                                      |
| Crystal size                      | 0.23x 0.19 x 0.14 mm                                                                                                                     |
| Theta range for data collection   | 1.89 to 26.31 deg.                                                                                                                       |
| Limiting indices                  | $-12 \leq h \leq 13$ , $-15 \leq k \leq 15$ , $-17 \leq l \leq 17$                                                                       |
| Reflection collected/unique       | 10468/6121 [R(int) = 0.0656]                                                                                                             |
| Completeness to theta = 28.2      | 96.6%                                                                                                                                    |
| Absorption correction             | Semi-empirical from equivalents                                                                                                          |
| Max. and min. transmission        | 0.9745 and 0.9532                                                                                                                        |
| Refinement method                 | Full-matrix least-squares on F <sup>2</sup>                                                                                              |
| Data/restraints/parameters        | 6121/ 0/ 374                                                                                                                             |
| Goodness-of-fit on F <sup>2</sup> | 1.028                                                                                                                                    |
| Final R indices [I > 2σ(I)]       | R1 = 0.1239, wR2 = 0.3167                                                                                                                |
| R indices (all data)              | R1 = 0.2712, wR2 = 0.4173                                                                                                                |
| Extinction coefficient            | 0.010(5)                                                                                                                                 |
| Largest diff. peak and hole       | 0.689 and -0.735 e.Å <sup>-3</sup>                                                                                                       |

**Table S5** Bond lengths [Å] and angles [deg] for **7e**

---

|              |           |
|--------------|-----------|
| C(1)-O(1)    | 1.244(8)  |
| C(1)-C(8)    | 1.390(9)  |
| C(1)-C(2)    | 1.530(10) |
| C(2)-C(7)    | 1.371(10) |
| C(2)-C(3)    | 1.385(9)  |
| C(3)-C(4)    | 1.369(10) |
| C(3)-H(3)    | 0.9300    |
| C(4)-C(5)    | 1.352(11) |
| C(4)-H(4)    | 0.9300    |
| C(5)-C(6)    | 1.405(12) |
| C(5)-H(5)    | 0.9300    |
| C(6)-C(7)    | 1.355(12) |
| C(6)-H(6)    | 0.9300    |
| C(7)-H(7)    | 0.9300    |
| C(8)-C(9)    | 1.403(10) |
| C(8)-C(19)   | 1.523(8)  |
| C(9)-N(1)    | 1.320(8)  |
| C(9)-N(2)    | 1.359(8)  |
| C(10)-N(1)   | 1.464(9)  |
| C(10)-C(12)  | 1.486(10) |
| C(10)-C(11)  | 1.503(10) |
| C(10)-H(10)  | 0.9800    |
| C(11)-H(11A) | 0.9600    |
| C(11)-H(11B) | 0.9600    |
| C(11)-H(11C) | 0.9600    |
| C(12)-N(2)   | 1.483(9)  |
| C(12)-H(12A) | 0.9700    |
| C(12)-H(12B) | 0.9700    |
| C(13)-O(2)   | 1.396(7)  |
| C(13)-N(2)   | 1.444(8)  |
| C(13)-C(14)  | 1.533(10) |
| C(13)-C(15)  | 1.534(10) |
| C(14)-F(3)   | 1.317(8)  |
| C(14)-F(1)   | 1.328(10) |
| C(14)-F(2)   | 1.341(9)  |
| C(15)-C(16)  | 1.506(9)  |
| C(15)-C(19)  | 1.537(9)  |
| C(15)-H(15)  | 0.9800    |
| C(16)-O(3)   | 1.210(8)  |
| C(16)-O(4)   | 1.321(8)  |
| C(17)-C(18)  | 1.476(12) |
| C(17)-O(4)   | 1.477(8)  |
| C(17)-H(17A) | 0.9700    |
| C(17)-H(17B) | 0.9700    |
| C(18)-H(18A) | 0.9600    |
| C(18)-H(18B) | 0.9600    |
| C(18)-H(18C) | 0.9600    |
| C(19)-C(26)  | 1.512(9)  |
| C(19)-C(20)  | 1.577(9)  |
| C(20)-O(5)   | 1.219(7)  |
| C(20)-N(3)   | 1.332(8)  |
| C(21)-C(22)  | 1.389(11) |
| C(21)-N(3)   | 1.399(8)  |
| C(21)-C(26)  | 1.410(9)  |
| C(22)-C(23)  | 1.385(12) |
| C(22)-H(22)  | 0.9300    |

---

---

|                     |           |
|---------------------|-----------|
| C(23)-C(24)         | 1.394(13) |
| C(23)-H(23)         | 0.9300    |
| C(24)-C(25)         | 1.403(11) |
| C(24)-H(24)         | 0.9300    |
| C(25)-C(26)         | 1.346(9)  |
| C(25)-H(25)         | 0.9300    |
| C(27)-Cl(3)         | 1.658(17) |
| C(27)-Cl(2)         | 1.72(2)   |
| C(27)-Cl(1)         | 1.85(2)   |
| C(27)-H(27)         | 0.9800    |
| N(1)-H(1)           | 0.8600    |
| N(3)-H(3A)          | 0.8600    |
| O(2)-H(2)           | 0.8200    |
| O(1)-C(1)-C(8)      | 124.9(7)  |
| O(1)-C(1)-C(2)      | 113.1(6)  |
| C(8)-C(1)-C(2)      | 122.0(6)  |
| C(7)-C(2)-C(3)      | 118.2(7)  |
| C(7)-C(2)-C(1)      | 122.1(7)  |
| C(3)-C(2)-C(1)      | 119.0(7)  |
| C(4)-C(3)-C(2)      | 121.1(7)  |
| C(4)-C(3)-H(3)      | 119.4     |
| C(2)-C(3)-H(3)      | 119.4     |
| C(5)-C(4)-C(3)      | 119.2(8)  |
| C(5)-C(4)-H(4)      | 120.4     |
| C(3)-C(4)-H(4)      | 120.4     |
| C(4)-C(5)-C(6)      | 121.3(8)  |
| C(4)-C(5)-H(5)      | 119.3     |
| C(6)-C(5)-H(5)      | 119.3     |
| C(7)-C(6)-C(5)      | 117.8(8)  |
| C(7)-C(6)-H(6)      | 121.1     |
| C(5)-C(6)-H(6)      | 121.1     |
| C(6)-C(7)-C(2)      | 122.3(8)  |
| C(6)-C(7)-H(7)      | 118.9     |
| C(2)-C(7)-H(7)      | 118.9     |
| C(1)-C(8)-C(9)      | 118.1(6)  |
| C(1)-C(8)-C(19)     | 124.3(6)  |
| C(9)-C(8)-C(19)     | 117.4(6)  |
| N(1)-C(9)-N(2)      | 108.5(6)  |
| N(1)-C(9)-C(8)      | 126.0(7)  |
| N(2)-C(9)-C(8)      | 125.4(6)  |
| N(1)-C(10)-C(12)    | 101.0(6)  |
| N(1)-C(10)-C(11)    | 110.1(7)  |
| C(12)-C(10)-C(11)   | 113.7(7)  |
| N(1)-C(10)-H(10)    | 110.6     |
| C(12)-C(10)-H(10)   | 110.6     |
| C(11)-C(10)-H(10)   | 110.6     |
| C(10)-C(11)-H(11A)  | 109.5     |
| C(10)-C(11)-H(11B)  | 109.5     |
| H(11A)-C(11)-H(11B) | 109.5     |
| C(10)-C(11)-H(11C)  | 109.5     |
| H(11A)-C(11)-H(11C) | 109.5     |
| H(11B)-C(11)-H(11C) | 109.5     |
| N(2)-C(12)-C(10)    | 103.4(6)  |
| N(2)-C(12)-H(12A)   | 111.1     |
| C(10)-C(12)-H(12A)  | 111.1     |
| N(2)-C(12)-H(12B)   | 111.1     |
| C(10)-C(12)-H(12B)  | 111.1     |

---

---

|                     |          |
|---------------------|----------|
| H(12A)-C(12)-H(12B) | 109.0    |
| O(2)-C(13)-N(2)     | 112.1(6) |
| O(2)-C(13)-C(14)    | 104.2(6) |
| N(2)-C(13)-C(14)    | 108.2(6) |
| O(2)-C(13)-C(15)    | 114.5(6) |
| N(2)-C(13)-C(15)    | 107.3(5) |
| C(14)-C(13)-C(15)   | 110.5(6) |
| F(3)-C(14)-F(1)     | 106.6(7) |
| F(3)-C(14)-F(2)     | 105.4(7) |
| F(1)-C(14)-F(2)     | 107.1(7) |
| F(3)-C(14)-C(13)    | 112.5(7) |
| F(1)-C(14)-C(13)    | 113.5(7) |
| F(2)-C(14)-C(13)    | 111.2(7) |
| C(16)-C(15)-C(13)   | 114.4(5) |
| C(16)-C(15)-C(19)   | 110.4(5) |
| C(13)-C(15)-C(19)   | 113.7(5) |
| C(16)-C(15)-H(15)   | 105.9    |
| C(13)-C(15)-H(15)   | 105.9    |
| C(19)-C(15)-H(15)   | 105.9    |
| O(3)-C(16)-O(4)     | 123.3(7) |
| O(3)-C(16)-C(15)    | 124.1(7) |
| O(4)-C(16)-C(15)    | 112.5(6) |
| C(18)-C(17)-O(4)    | 110.1(7) |
| C(18)-C(17)-H(17A)  | 109.6    |
| O(4)-C(17)-H(17A)   | 109.6    |
| C(18)-C(17)-H(17B)  | 109.6    |
| O(4)-C(17)-H(17B)   | 109.6    |
| H(17A)-C(17)-H(17B) | 108.2    |
| C(17)-C(18)-H(18A)  | 109.5    |
| C(17)-C(18)-H(18B)  | 109.5    |
| H(18A)-C(18)-H(18B) | 109.5    |
| C(17)-C(18)-H(18C)  | 109.5    |
| H(18A)-C(18)-H(18C) | 109.5    |
| H(18B)-C(18)-H(18C) | 109.5    |
| C(26)-C(19)-C(8)    | 115.2(5) |
| C(26)-C(19)-C(15)   | 108.1(5) |
| C(8)-C(19)-C(15)    | 110.8(5) |
| C(26)-C(19)-C(20)   | 100.7(6) |
| C(8)-C(19)-C(20)    | 110.2(5) |
| C(15)-C(19)-C(20)   | 111.4(5) |
| O(5)-C(20)-N(3)     | 126.2(6) |
| O(5)-C(20)-C(19)    | 124.6(6) |
| N(3)-C(20)-C(19)    | 109.1(6) |
| C(22)-C(21)-N(3)    | 129.5(7) |
| C(22)-C(21)-C(26)   | 120.2(8) |
| N(3)-C(21)-C(26)    | 110.3(6) |
| C(23)-C(22)-C(21)   | 118.4(8) |
| C(23)-C(22)-H(22)   | 120.8    |
| C(21)-C(22)-H(22)   | 120.8    |
| C(22)-C(23)-C(24)   | 121.9(9) |
| C(22)-C(23)-H(23)   | 119.0    |
| C(24)-C(23)-H(23)   | 119.0    |
| C(23)-C(24)-C(25)   | 117.9(8) |
| C(23)-C(24)-H(24)   | 121.0    |
| C(25)-C(24)-H(24)   | 121.0    |
| C(26)-C(25)-C(24)   | 121.3(8) |
| C(26)-C(25)-H(25)   | 119.3    |

---

|                   |           |
|-------------------|-----------|
| C(24)-C(25)-H(25) | 119.3     |
| C(25)-C(26)-C(21) | 120.1(7)  |
| C(25)-C(26)-C(19) | 131.5(7)  |
| C(21)-C(26)-C(19) | 108.3(6)  |
| Cl(3)-C(27)-Cl(2) | 110.5(16) |
| Cl(3)-C(27)-Cl(1) | 111.3(10) |
| Cl(2)-C(27)-Cl(1) | 103.2(7)  |
| Cl(3)-C(27)-H(27) | 110.6     |
| Cl(2)-C(27)-H(27) | 110.6     |
| Cl(1)-C(27)-H(27) | 110.6     |
| C(9)-N(1)-C(10)   | 113.3(6)  |
| C(9)-N(1)-H(1)    | 123.4     |
| C(10)-N(1)-H(1)   | 123.4     |
| C(9)-N(2)-C(13)   | 120.5(6)  |
| C(9)-N(2)-C(12)   | 108.7(6)  |
| C(13)-N(2)-C(12)  | 123.5(6)  |
| C(20)-N(3)-C(21)  | 111.5(6)  |
| C(20)-N(3)-H(3A)  | 124.2     |
| C(21)-N(3)-H(3A)  | 124.2     |
| C(13)-O(2)-H(2)   | 109.5     |
| C(16)-O(4)-C(17)  | 117.8(5)  |

Symmetry transformations used to generate equivalent atoms:

**Table S6.** Hydrogen bonds for **7e** [Å and deg.].

| D-H...A             | d(D-H) | d(H...A) | d(D...A)  | <(DHA) |
|---------------------|--------|----------|-----------|--------|
| C(15)-H(15)...F(2)  | 0.98   | 2.54     | 2.902(8)  | 101.6  |
| C(12)-H(12A)...F(1) | 0.97   | 2.39     | 2.795(9)  | 104.8  |
| C(6)-H(6)...O(2)#1  | 0.93   | 2.49     | 3.400(10) | 165.4  |
| N(3)-H(3A)...O(5)#2 | 0.86   | 2.05     | 2.853(7)  | 155.4  |
| O(2)-H(2)...F(3)    | 0.82   | 2.35     | 2.767(7)  | 112.6  |
| N(1)-H(1)...O(1)#3  | 0.86   | 2.10     | 2.867(8)  | 148.4  |
| N(1)-H(1)...O(1)    | 0.86   | 2.05     | 2.623(8)  | 123.2  |

Symmetry transformations used to generate equivalent atoms:

#1 x+1,y,z    #2 -x,-y+1,-z    #3 -x,-y+1,-z+1



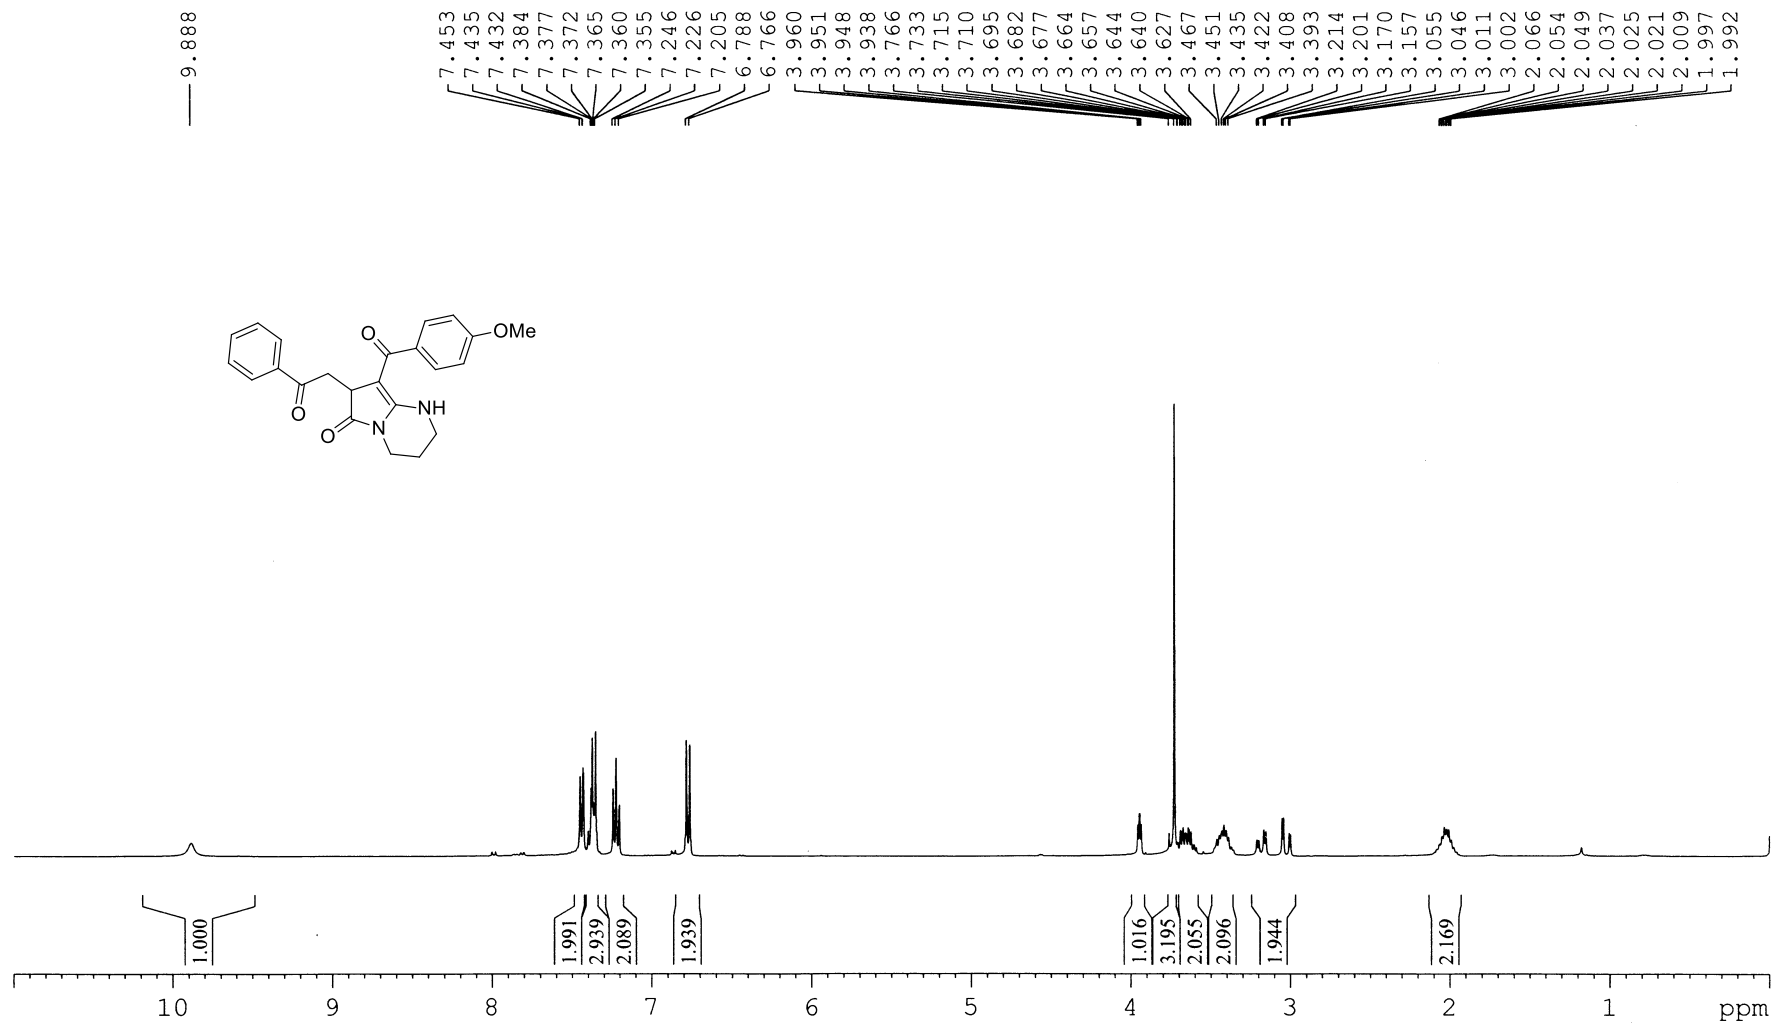

**Figure 1.**  $^1\text{H NMR}$  (400 MHz,  $\text{CDCl}_3$ ) spectra of compound 5a

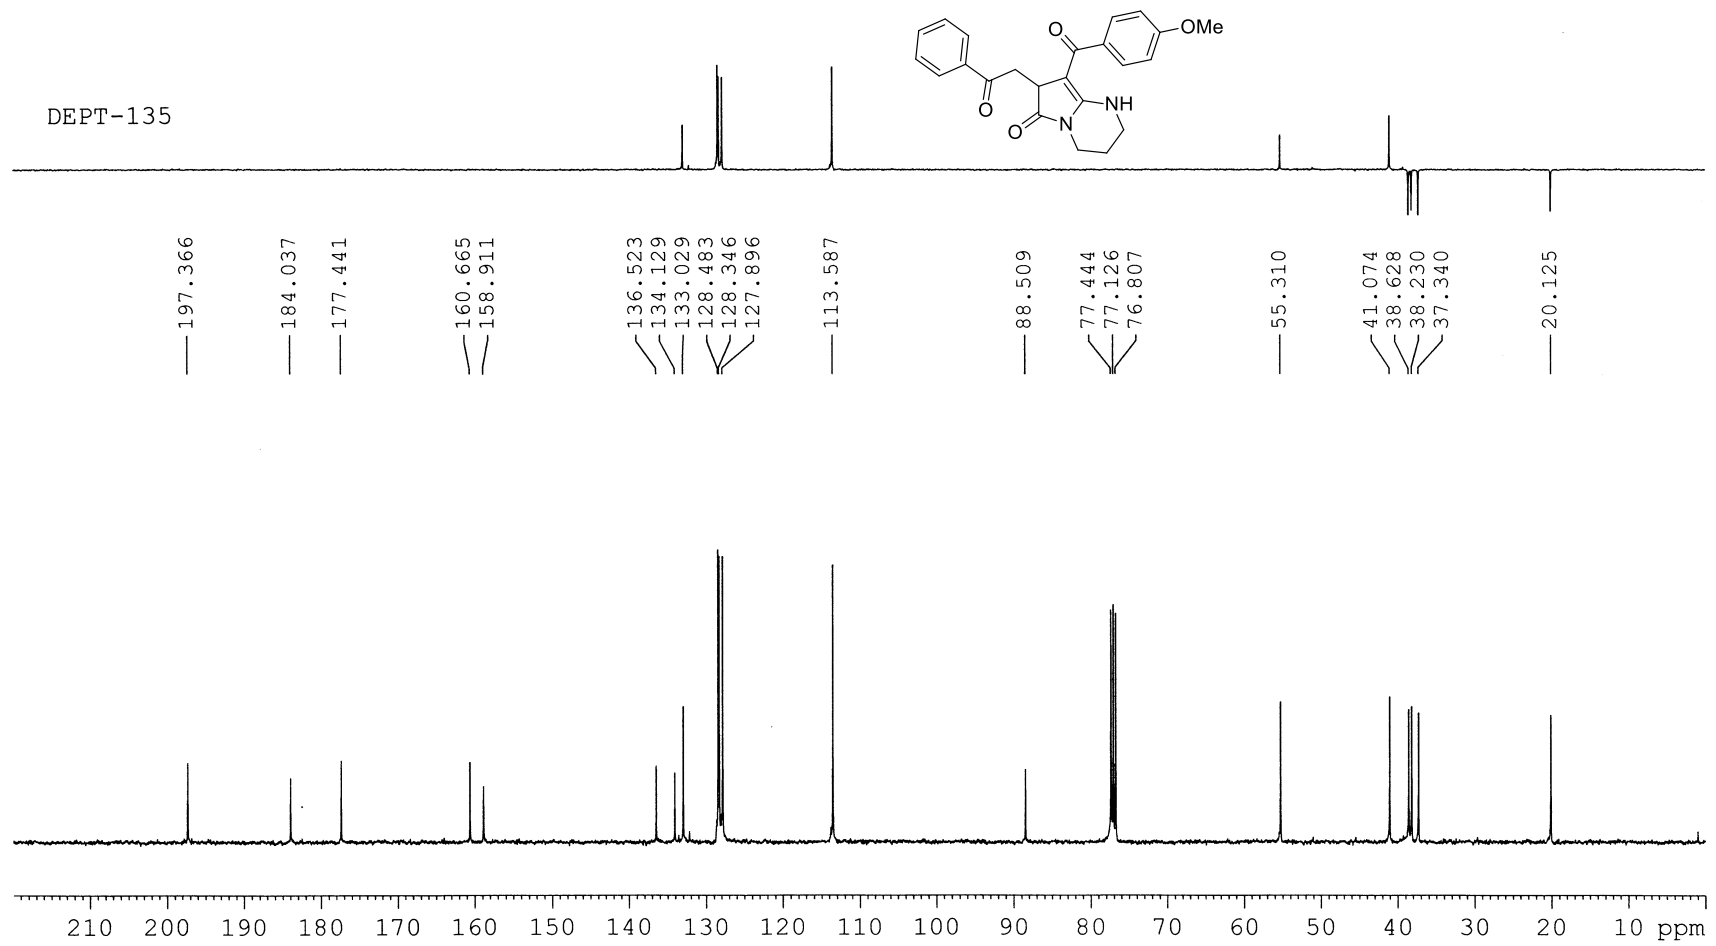

**Figure 2.**  $^{13}\text{C}$  NMR (100 MHz,  $\text{CDCl}_3$ ) spectra of compound **5a**

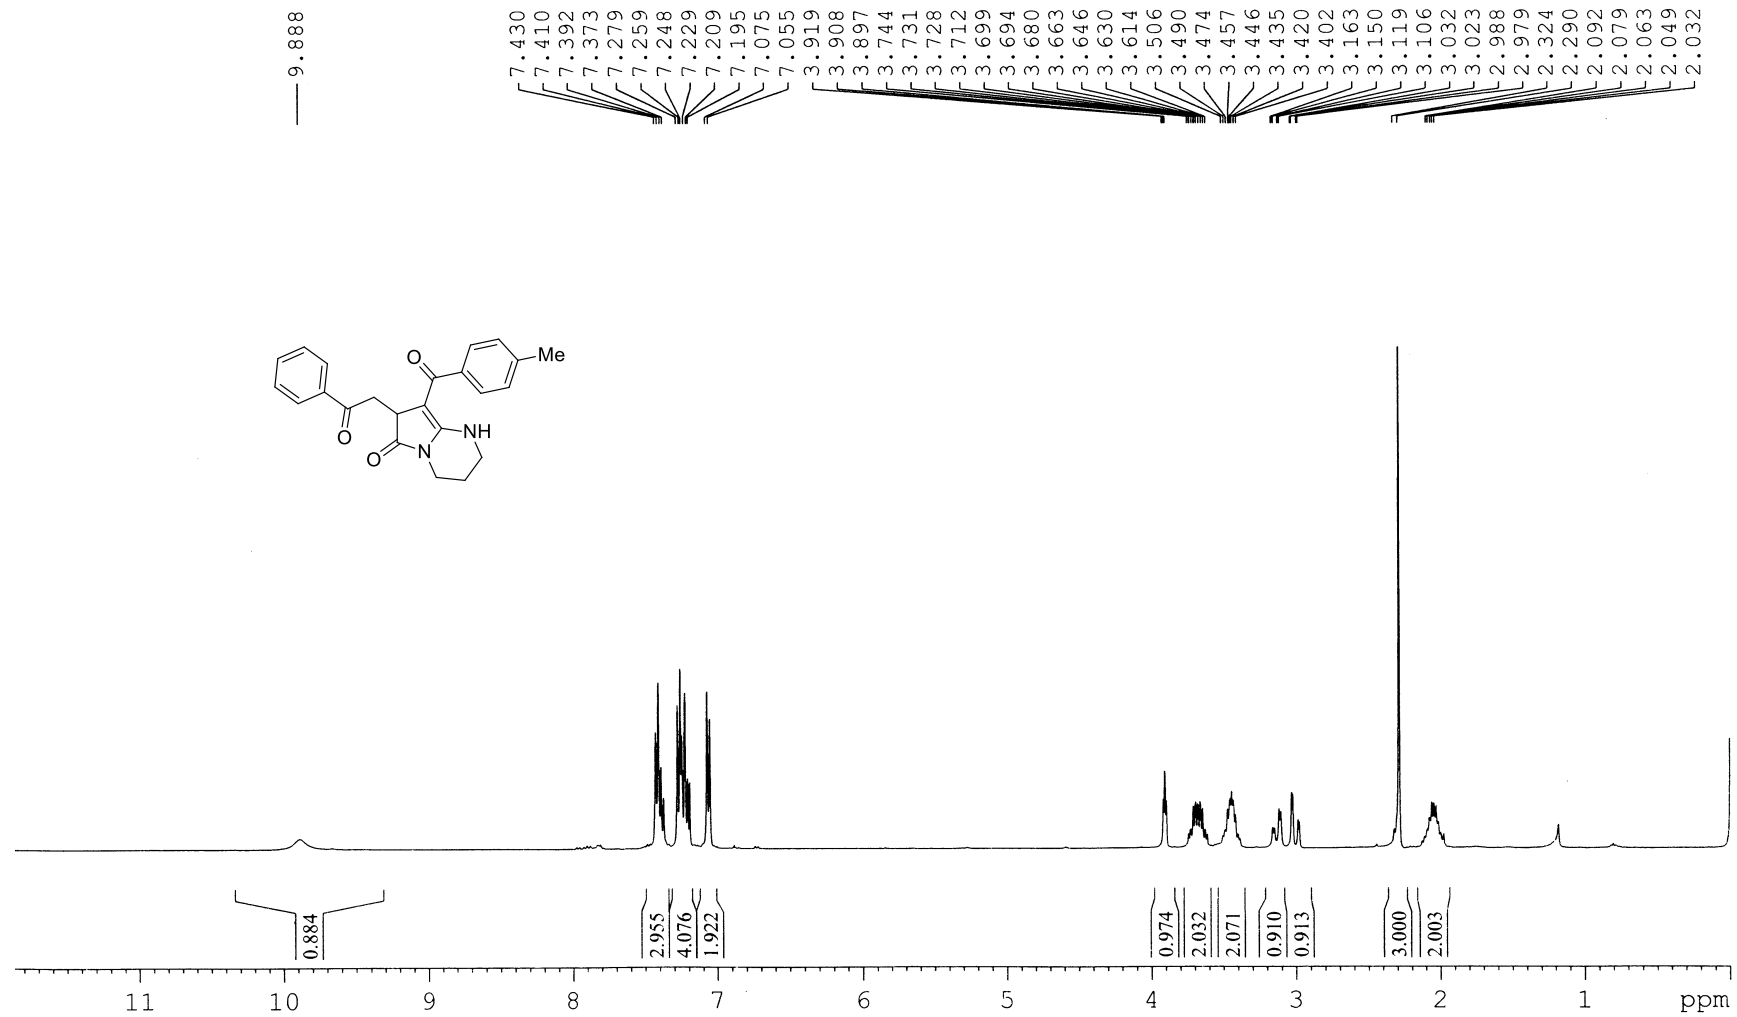

**Figure 3.** <sup>1</sup>H NMR (400 MHz, CDCl<sub>3</sub>) spectra of compound **5b**

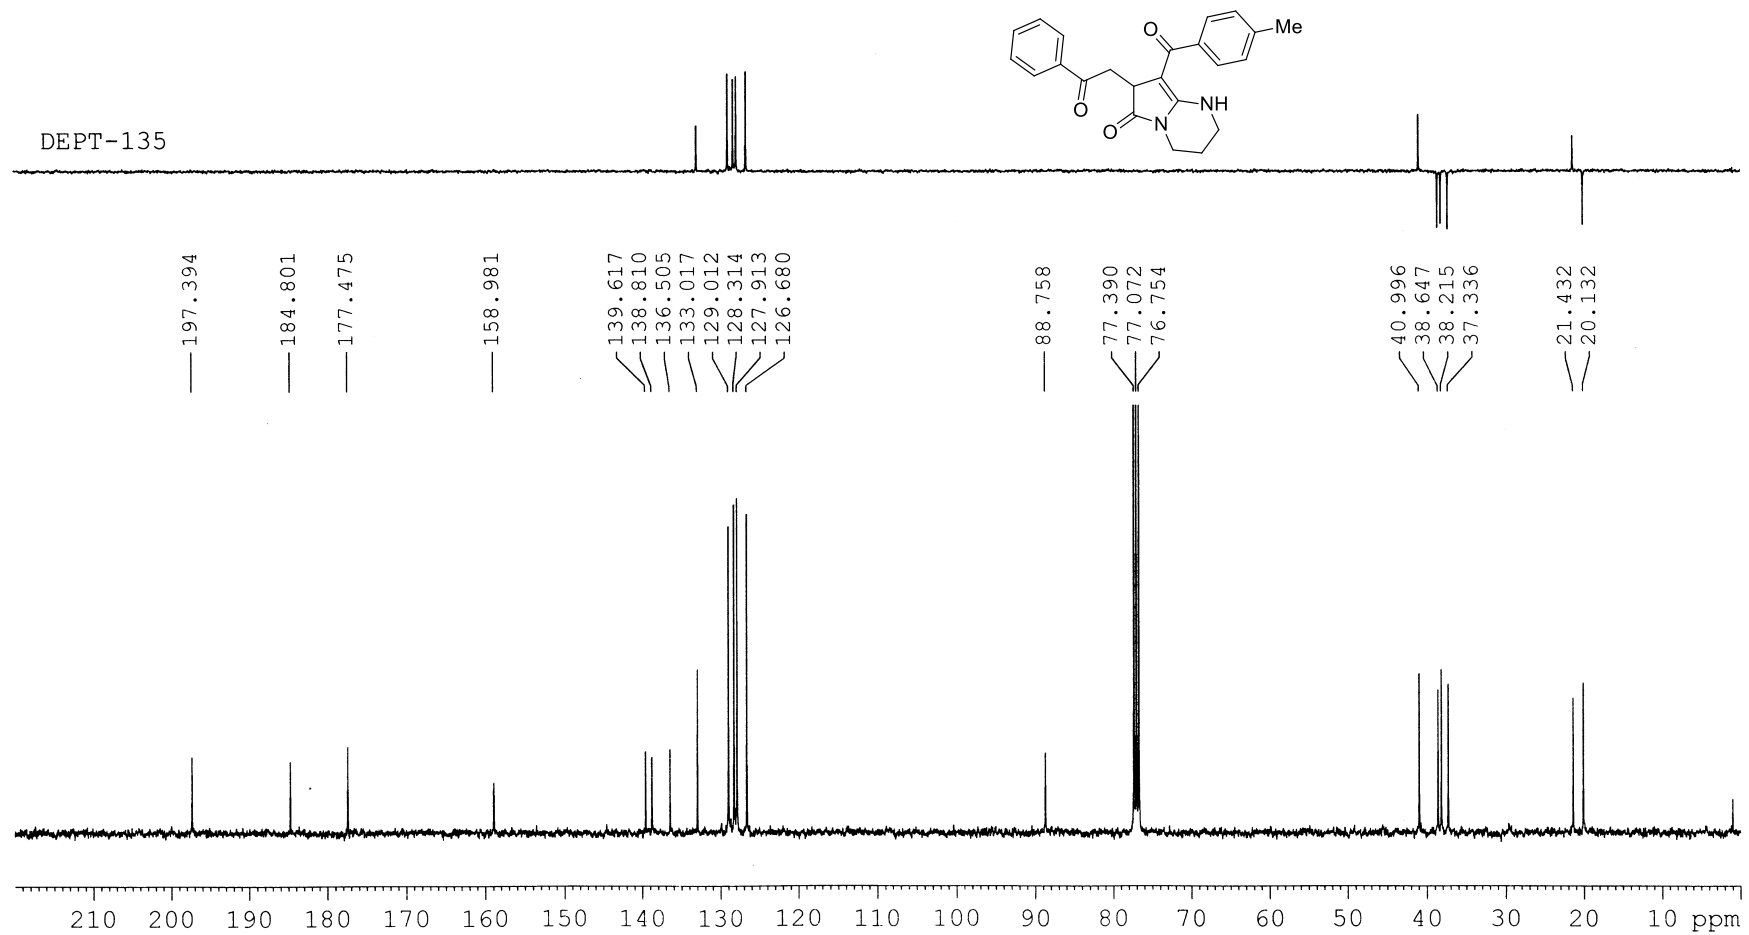

Figure 4. <sup>13</sup>C NMR (100 MHz, CDCl<sub>3</sub>) spectra of compound 5b

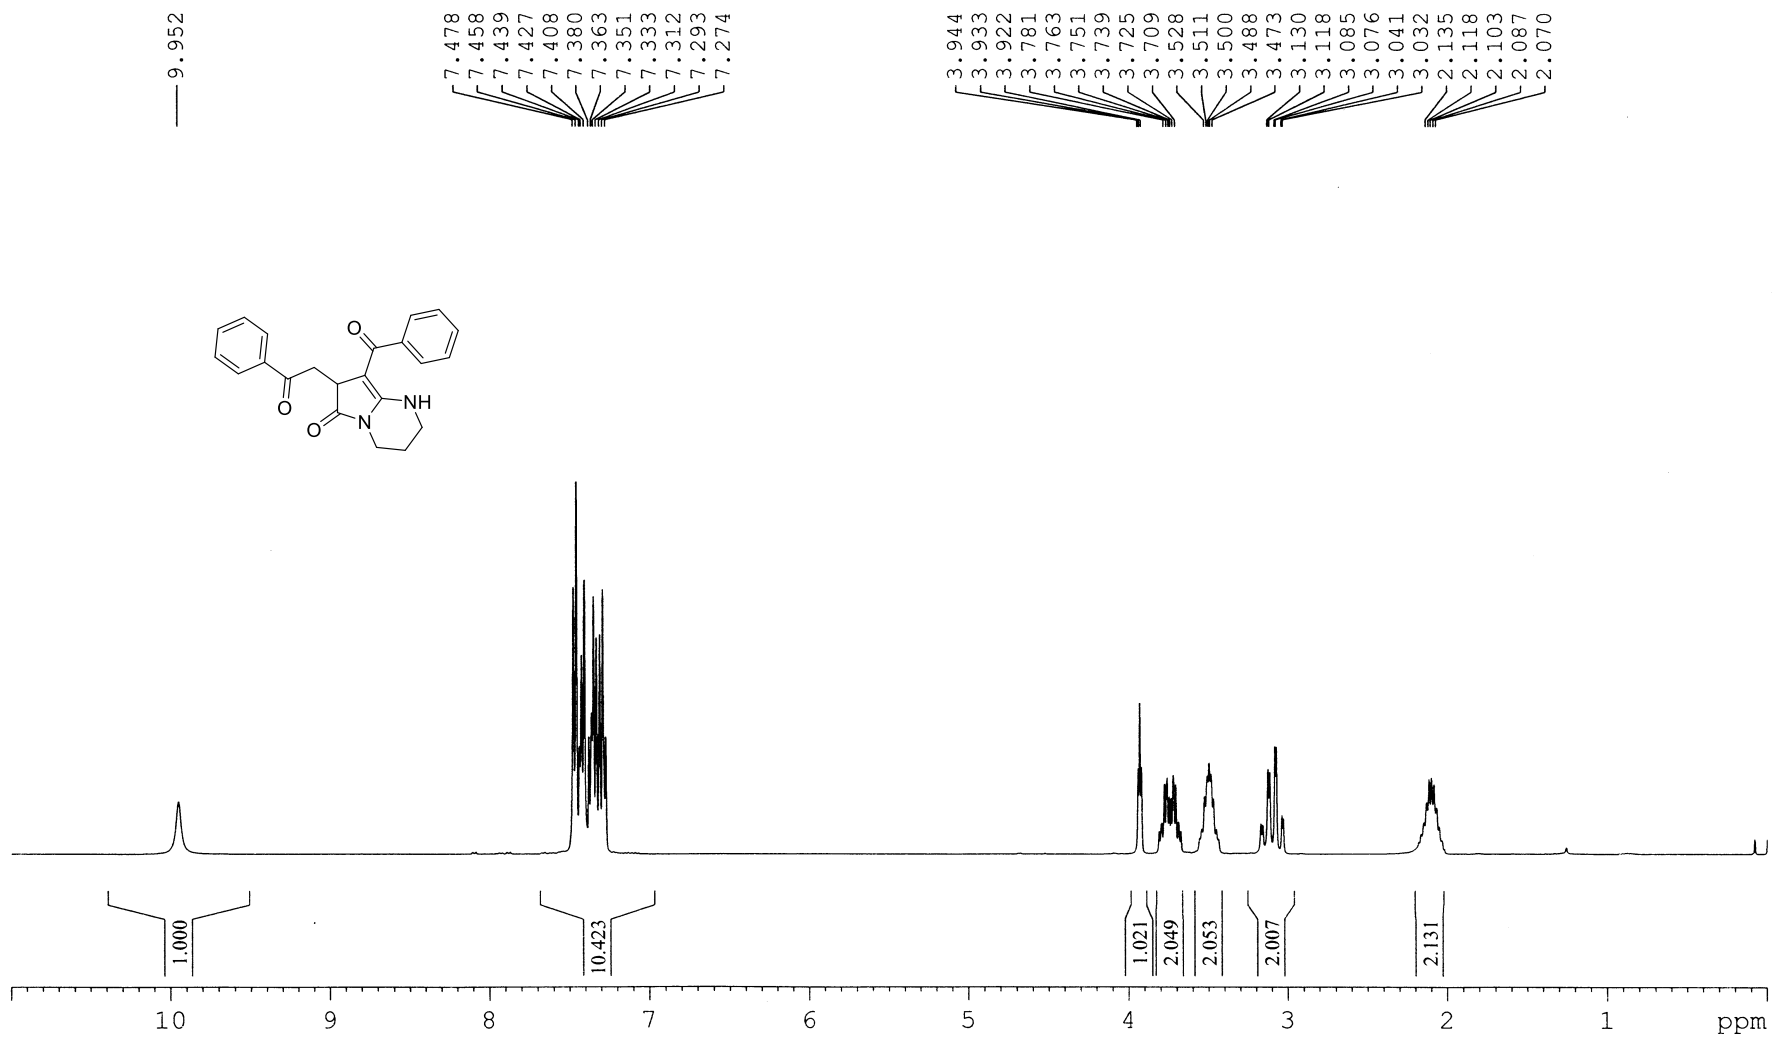

**Figure 5.**  $^1\text{H NMR}$  (400 MHz,  $\text{CDCl}_3$ ) spectra of compound 5c

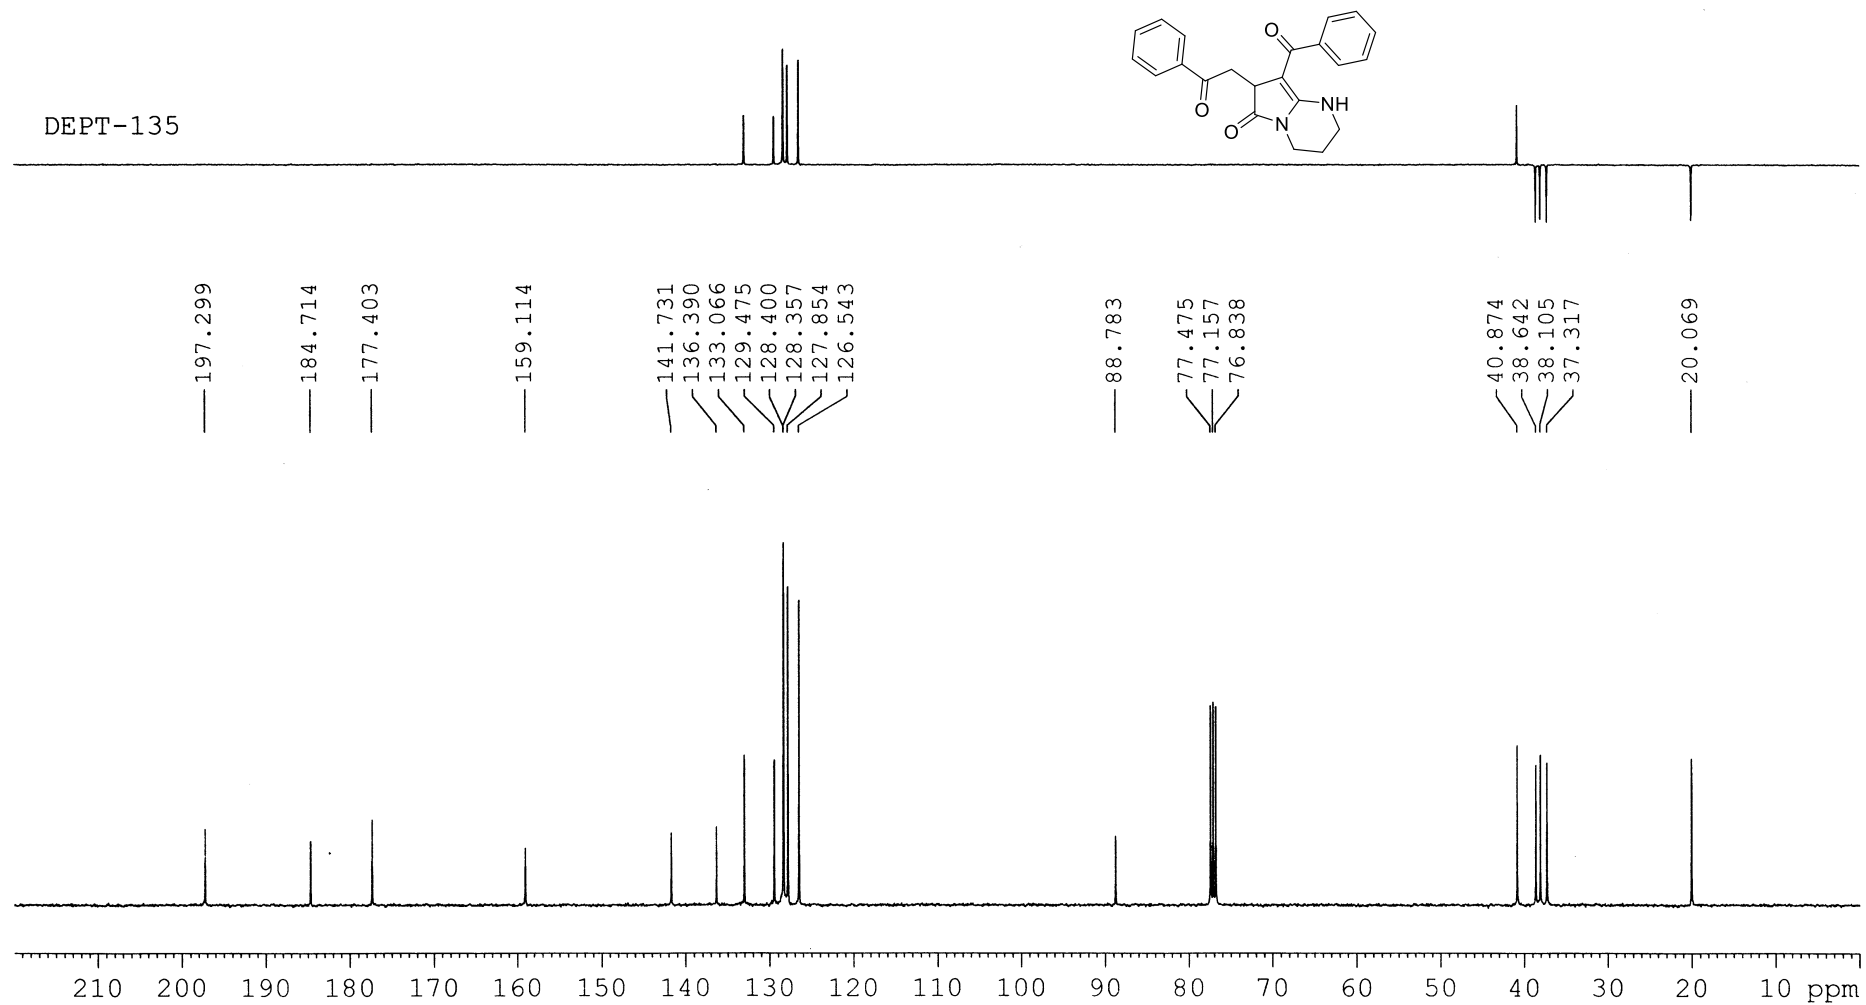

Figure 6.  $^{13}\text{C}$  NMR (100 MHz,  $\text{CDCl}_3$ ) spectra of compound 5c

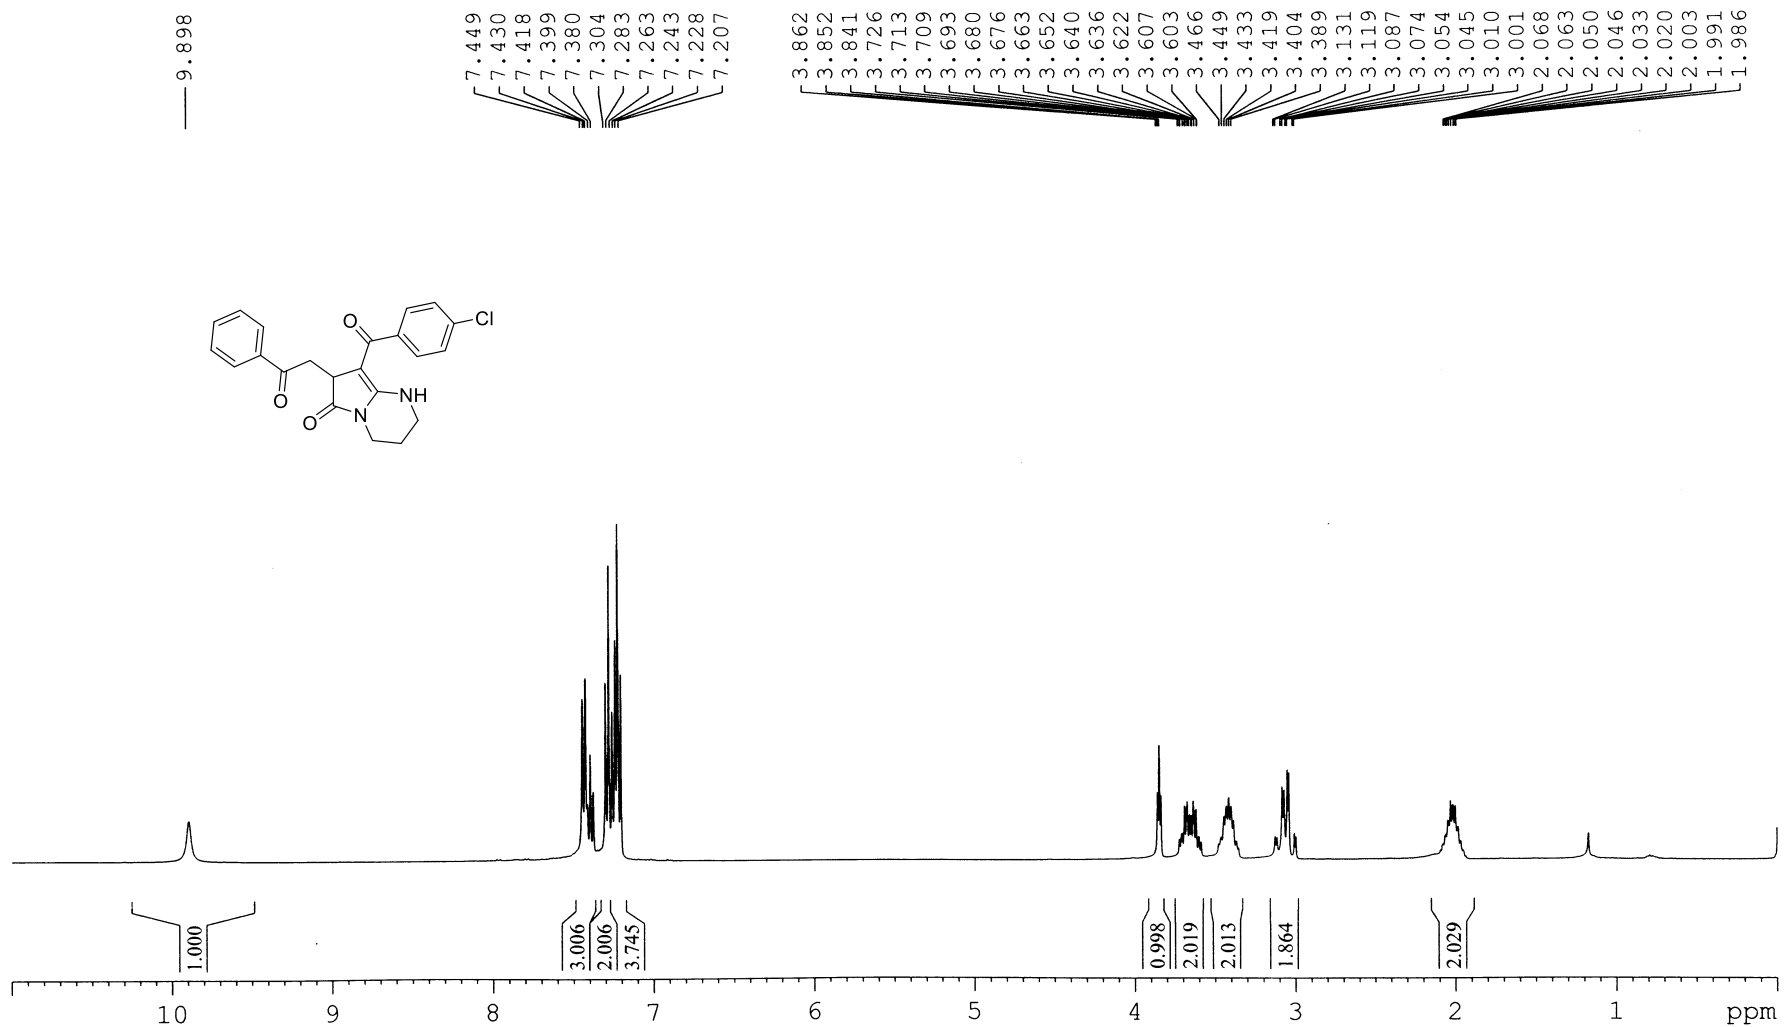

**Figure 7.**  $^1\text{H NMR}$  (400 MHz,  $\text{CDCl}_3$ ) spectra of compound **5d**

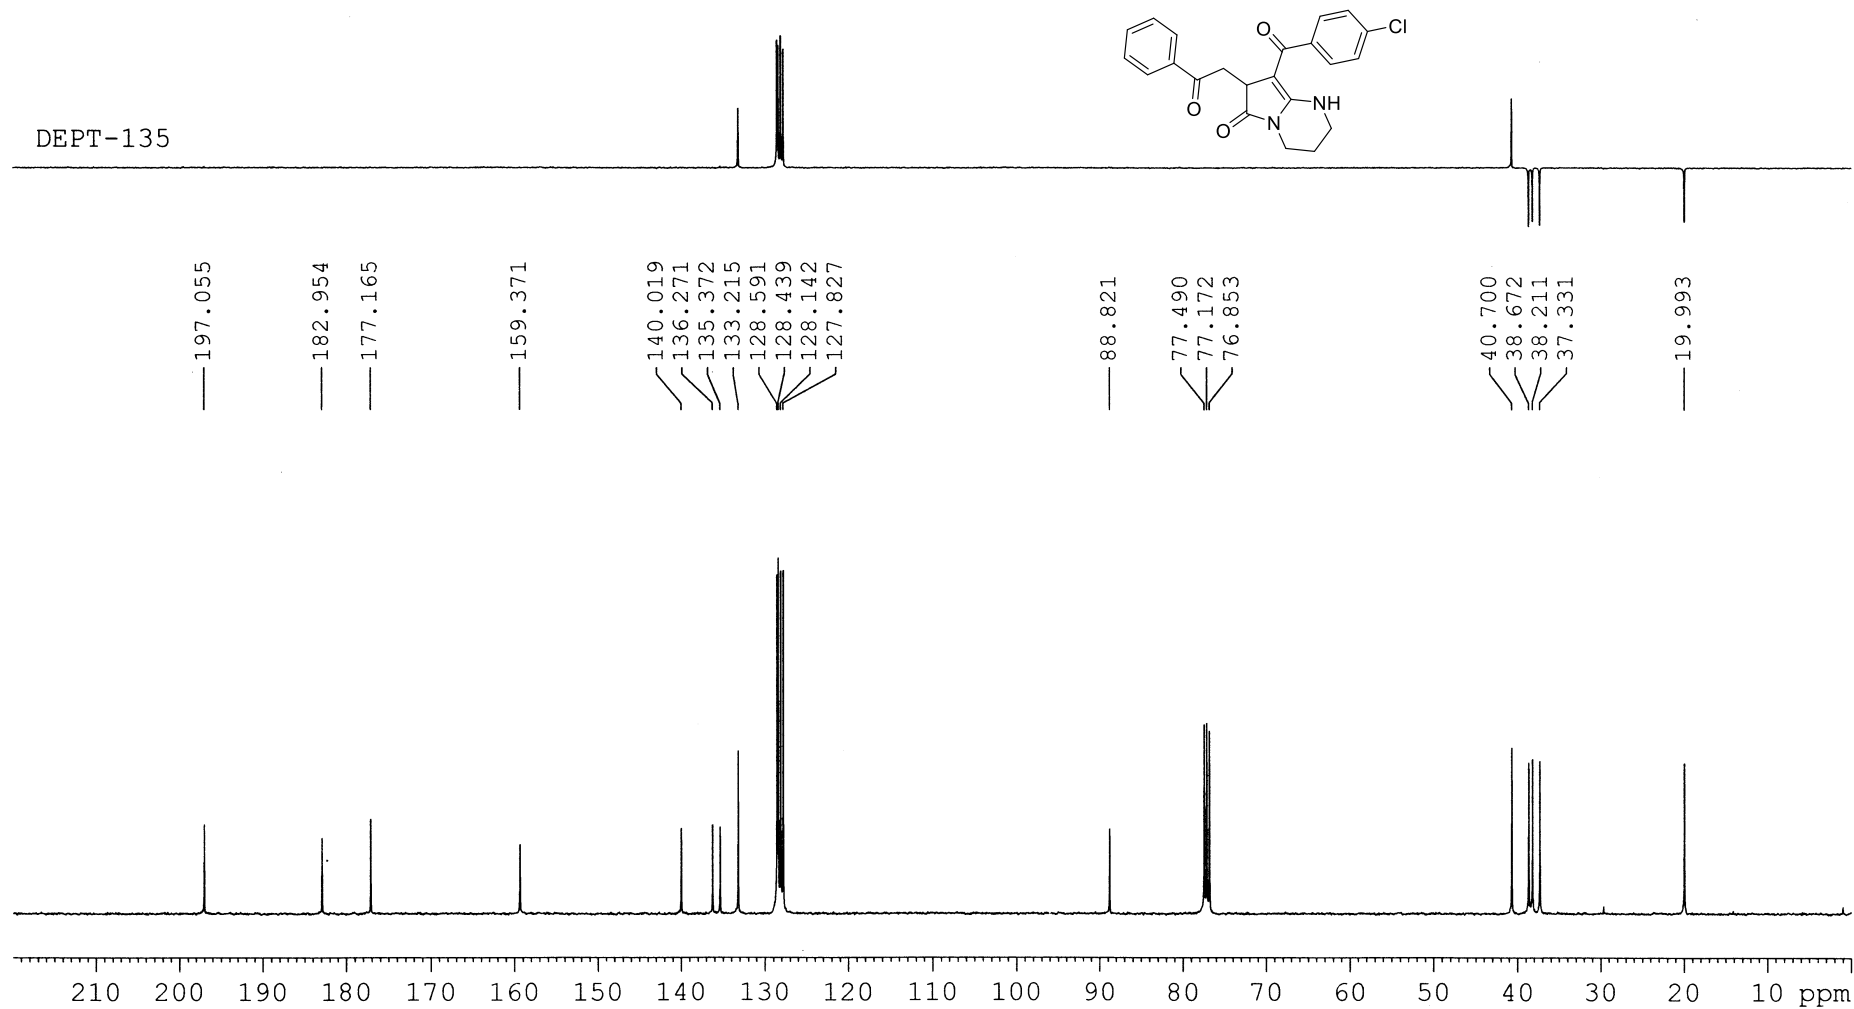

**Figure 8.**  $^{13}\text{C}$  NMR (100 MHz,  $\text{CDCl}_3$ ) spectra of compound **5d**



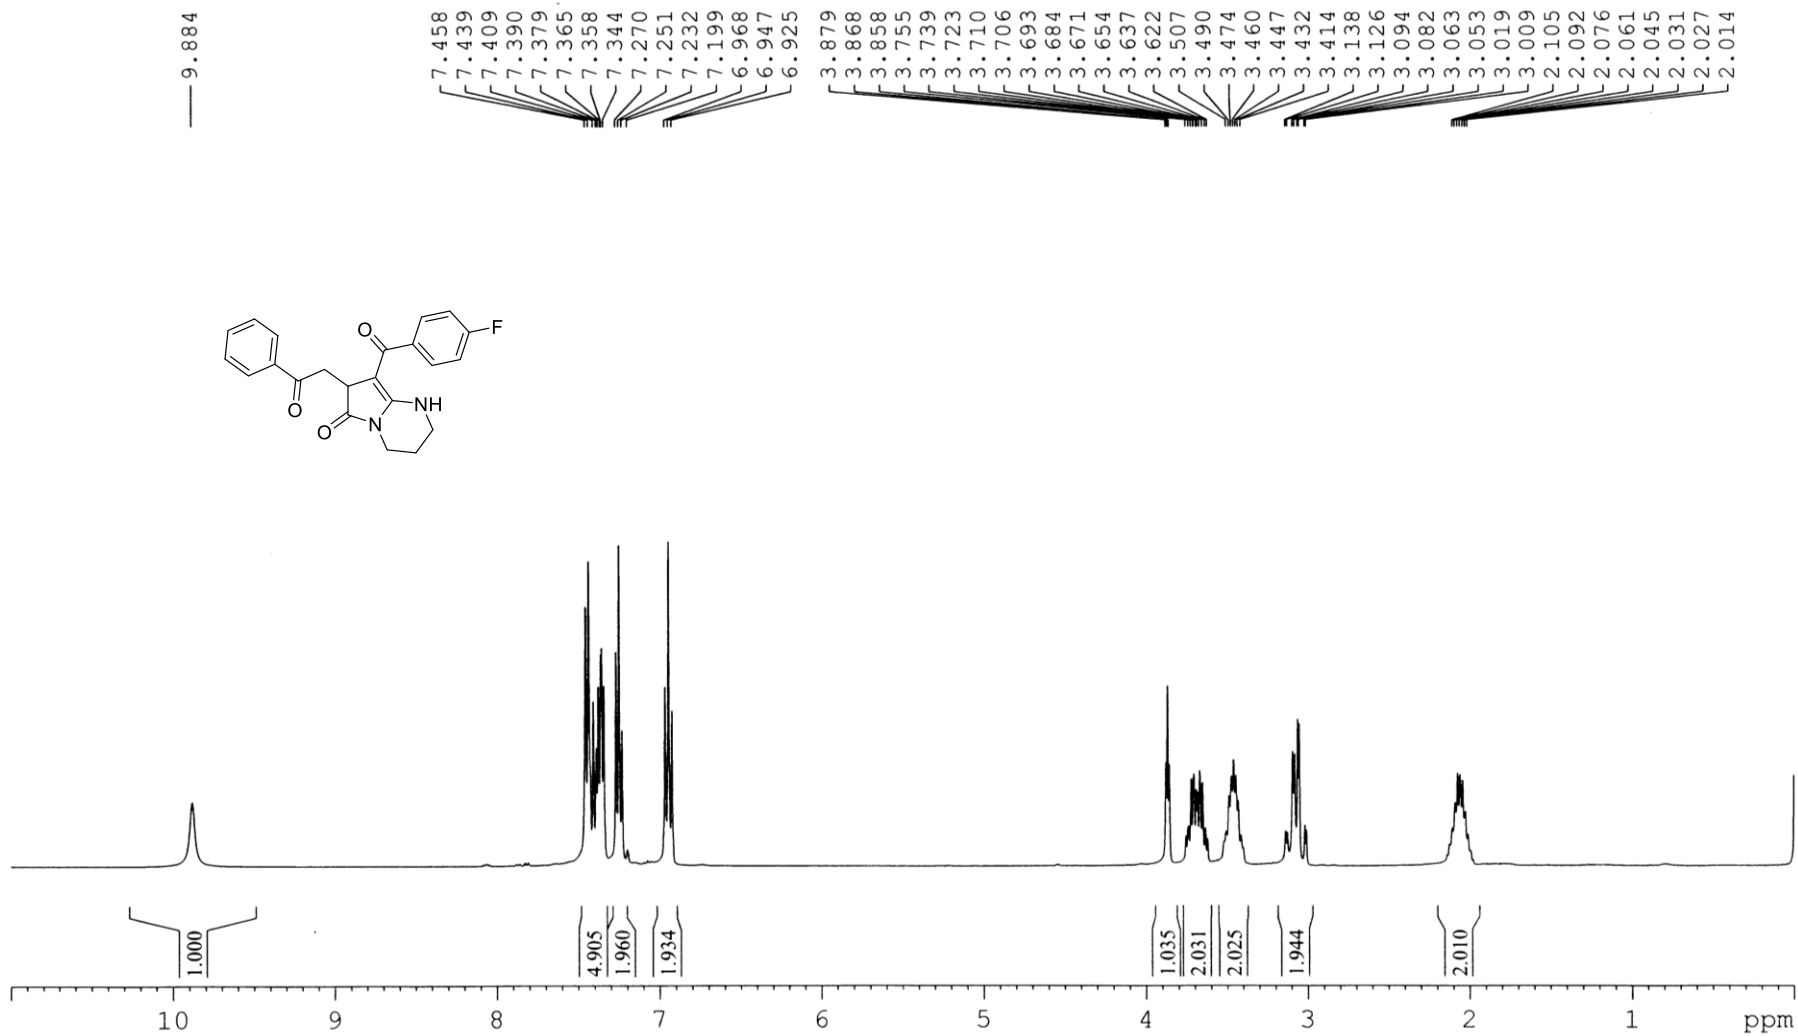

**Figure 9.**  $^1\text{H NMR}$  (400 MHz,  $\text{CDCl}_3$ ) spectra of compound **5e**

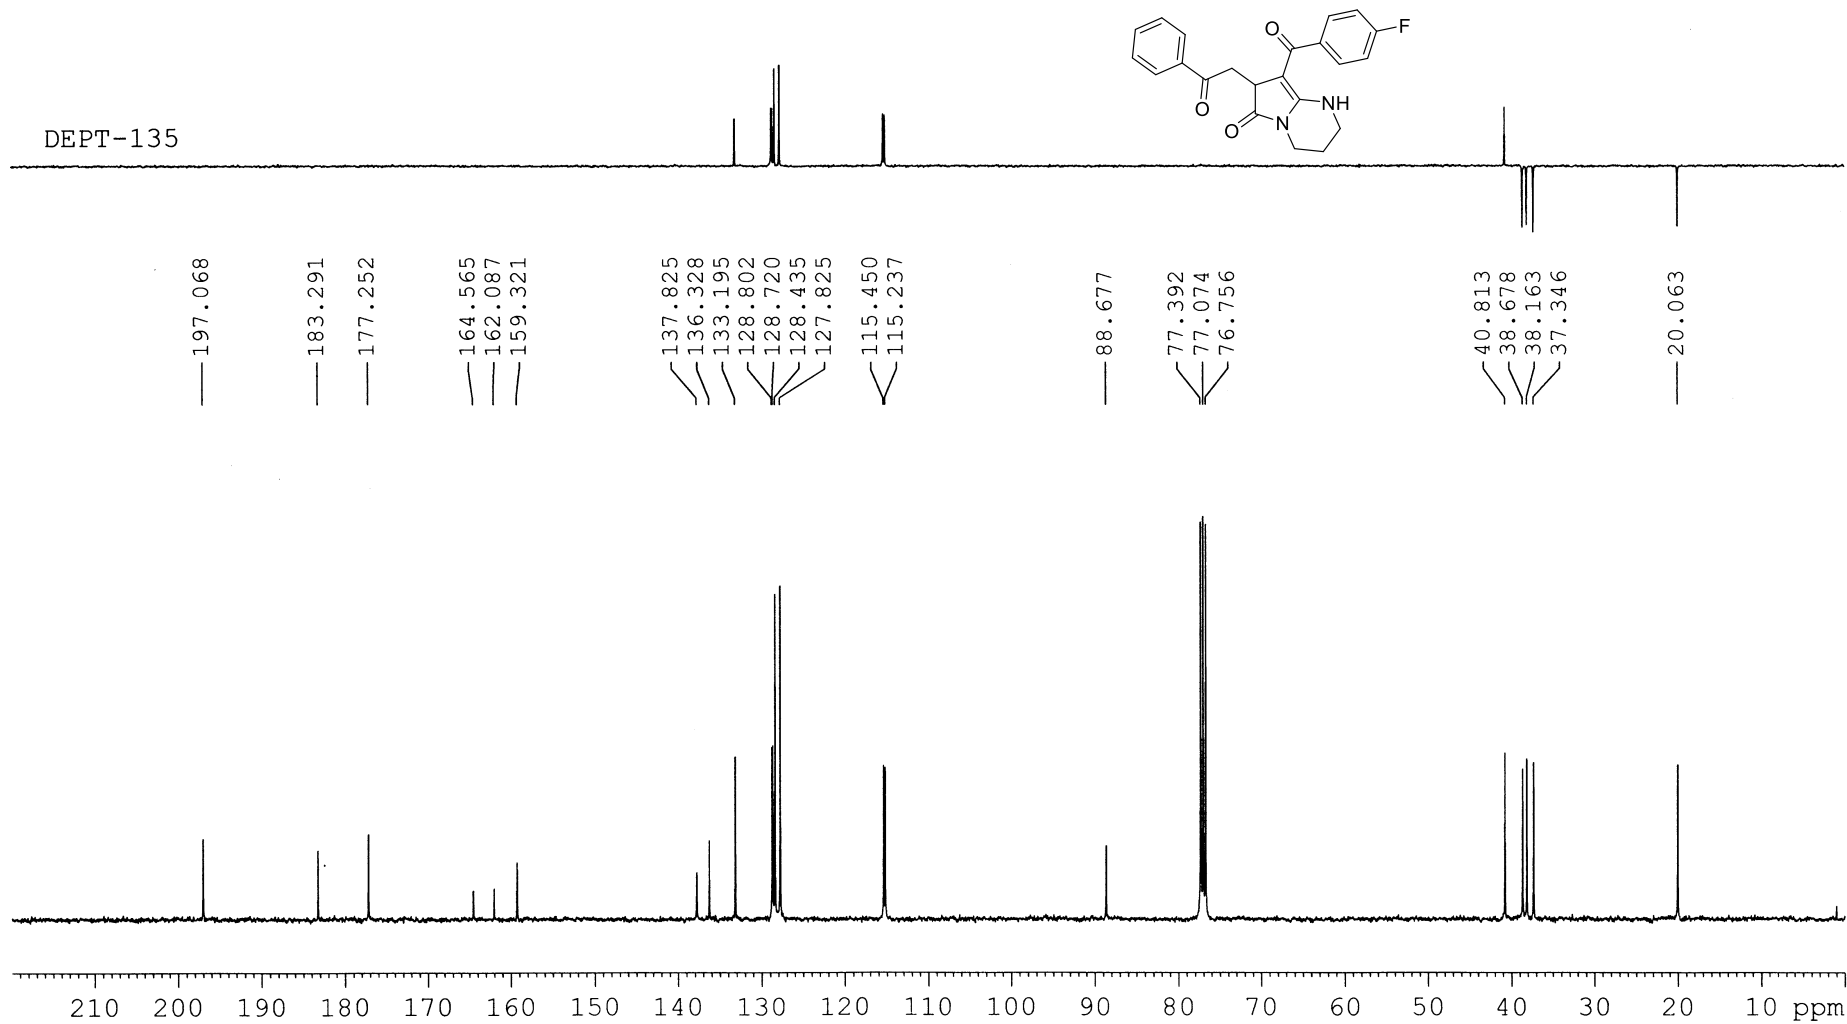

**Figure 10.**  $^{13}\text{C}$  NMR (100 MHz,  $\text{CDCl}_3$ ) spectra of compound **5e**

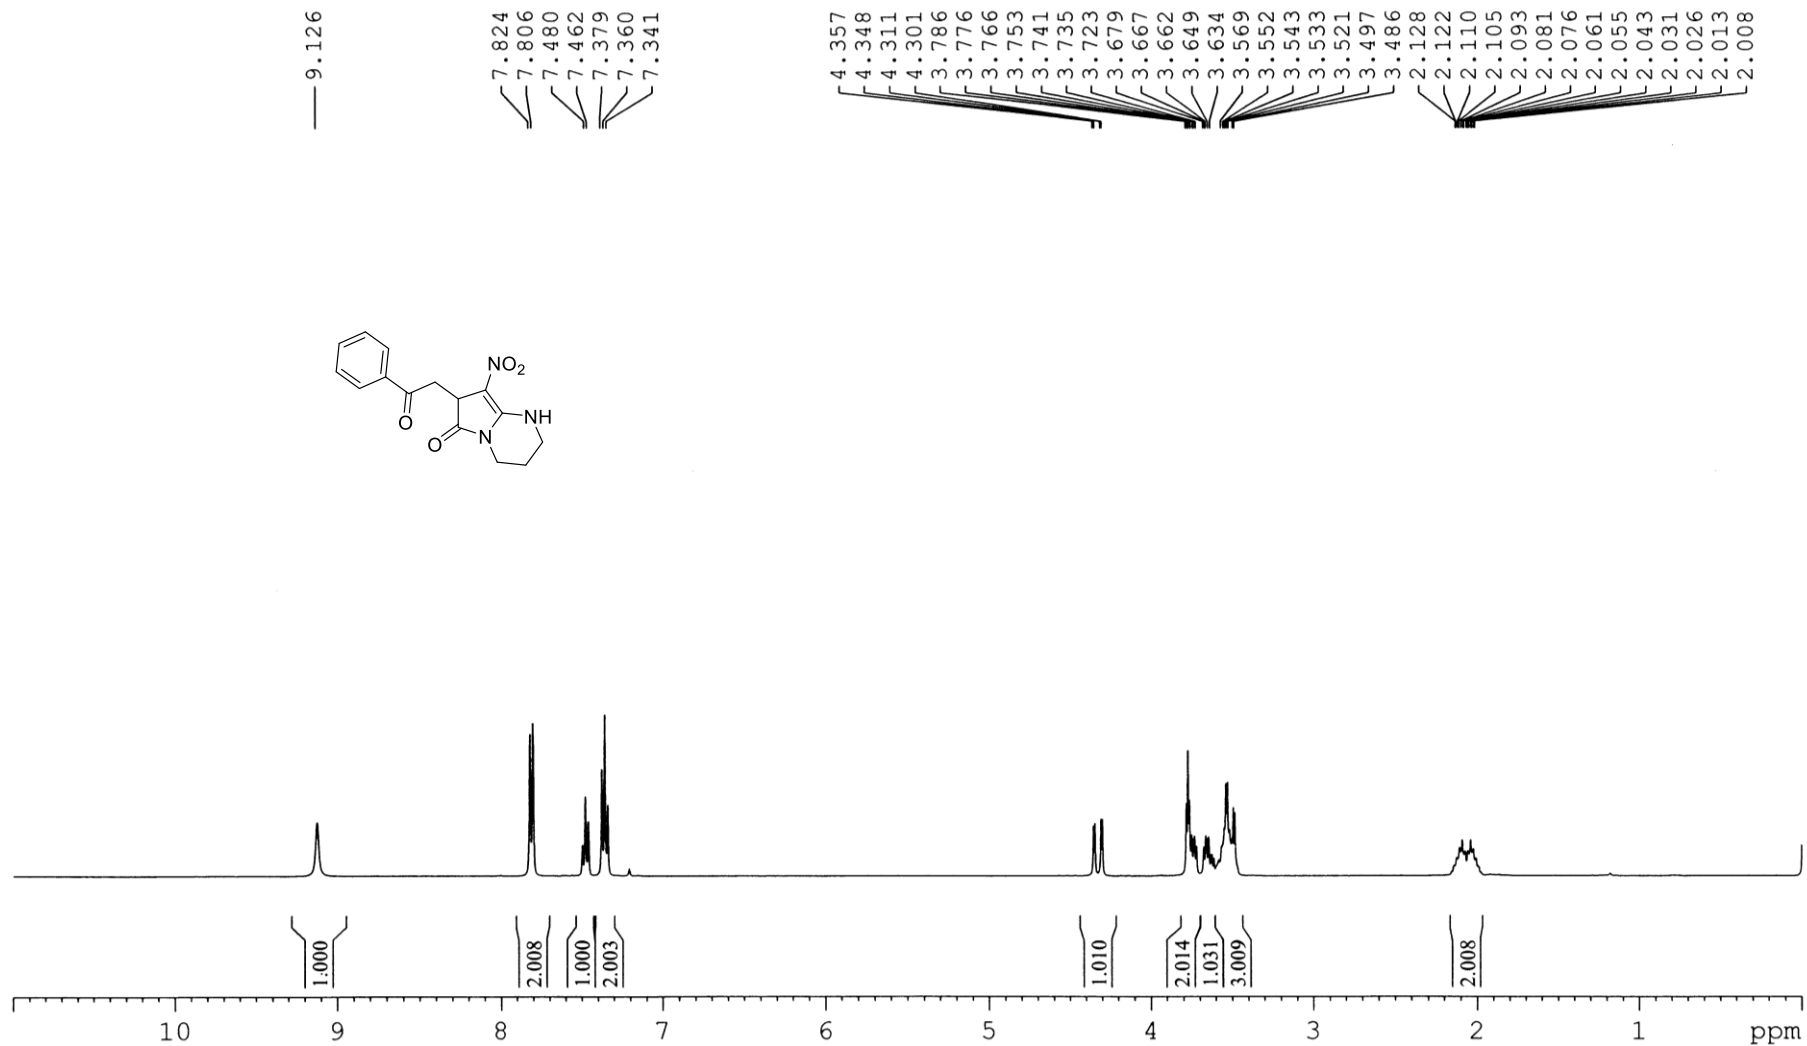

**Figure 11.** <sup>1</sup>H NMR (400 MHz, CDCl<sub>3</sub>) spectra of compound **5f**



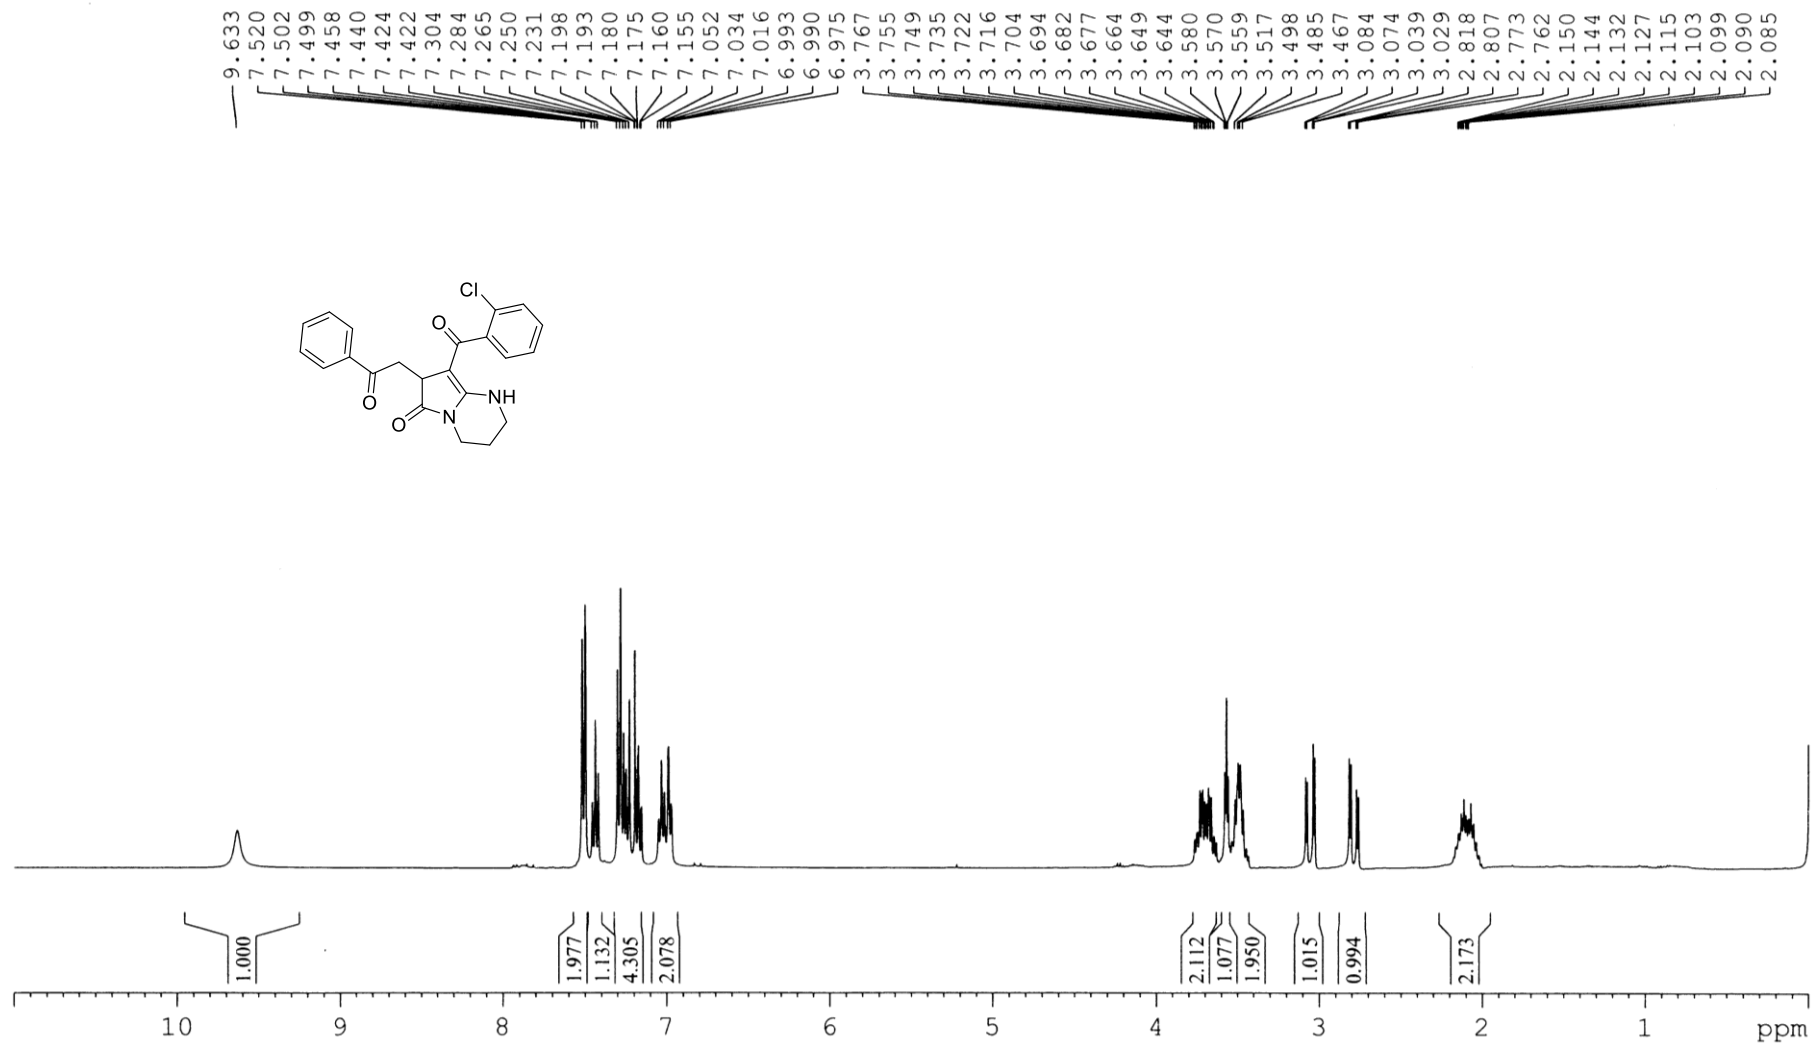

**Figure 13.** <sup>1</sup>H NMR (400 MHz, CDCl<sub>3</sub>) spectra of compound **5g**

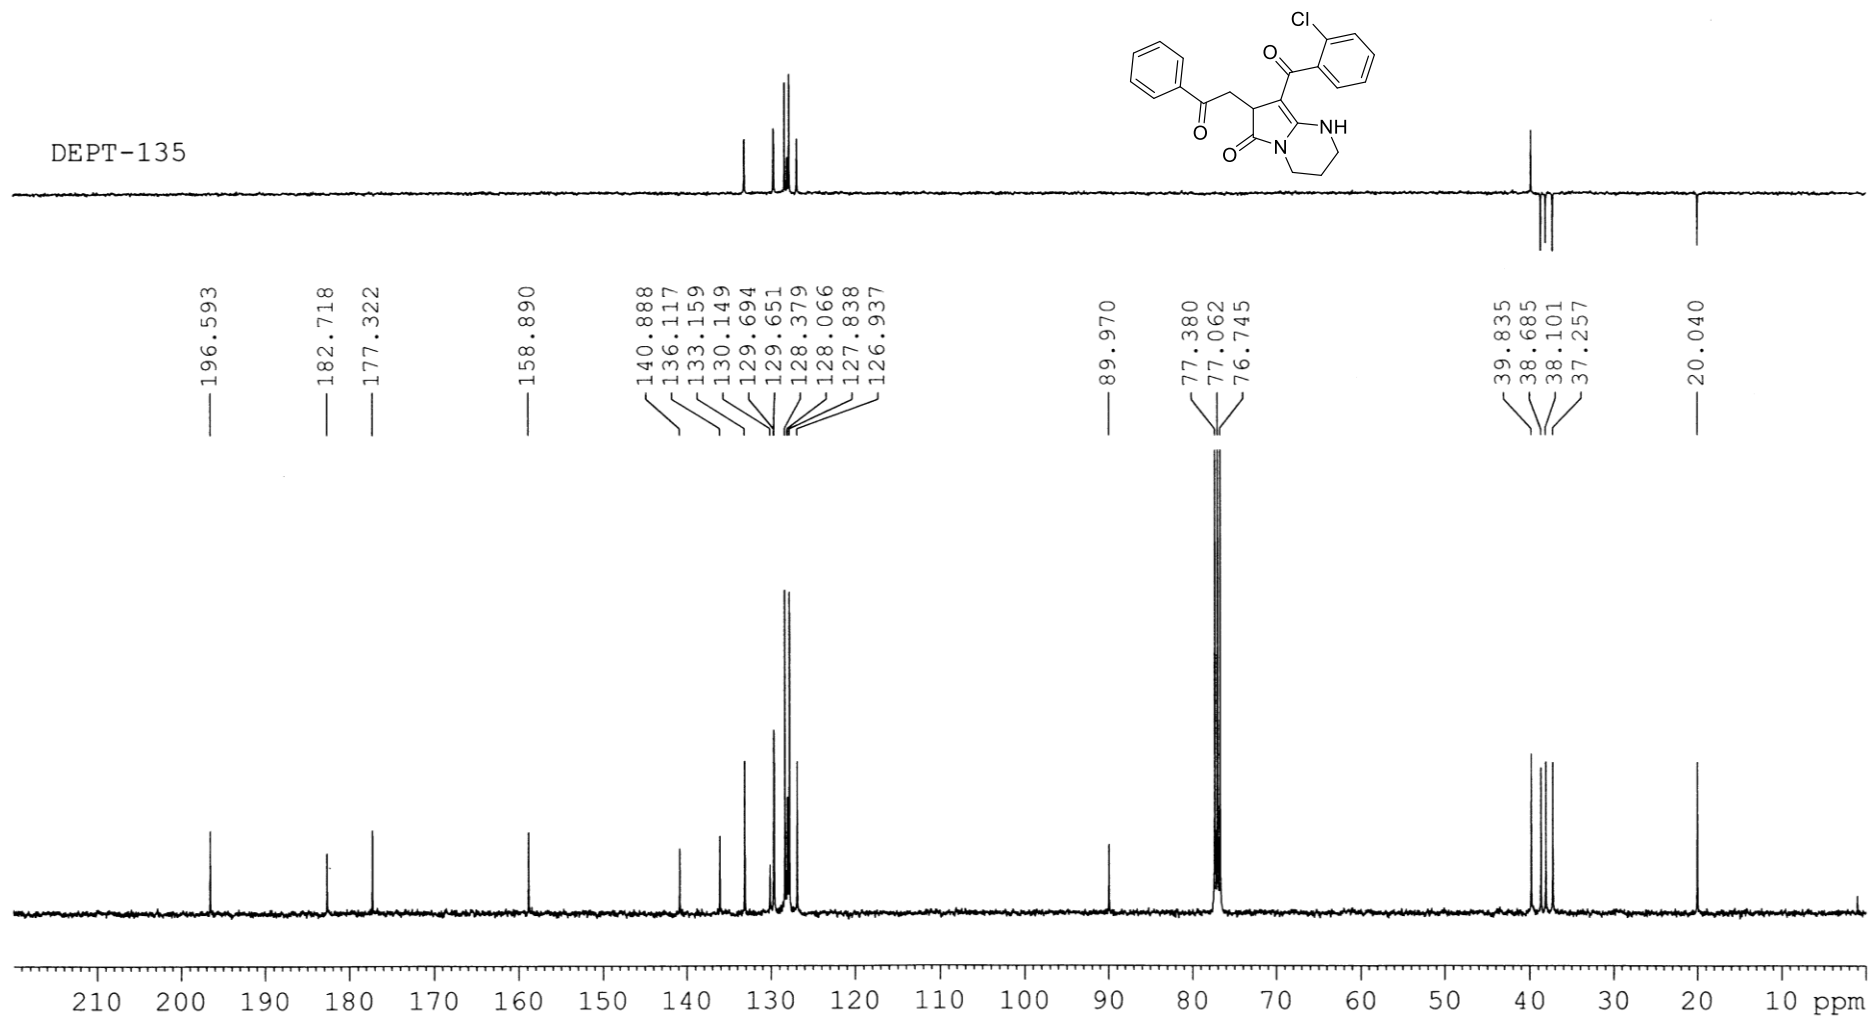

Figure 14.  $^{13}\text{C}$  NMR (100 MHz,  $\text{CDCl}_3$ ) spectra of compound 5g

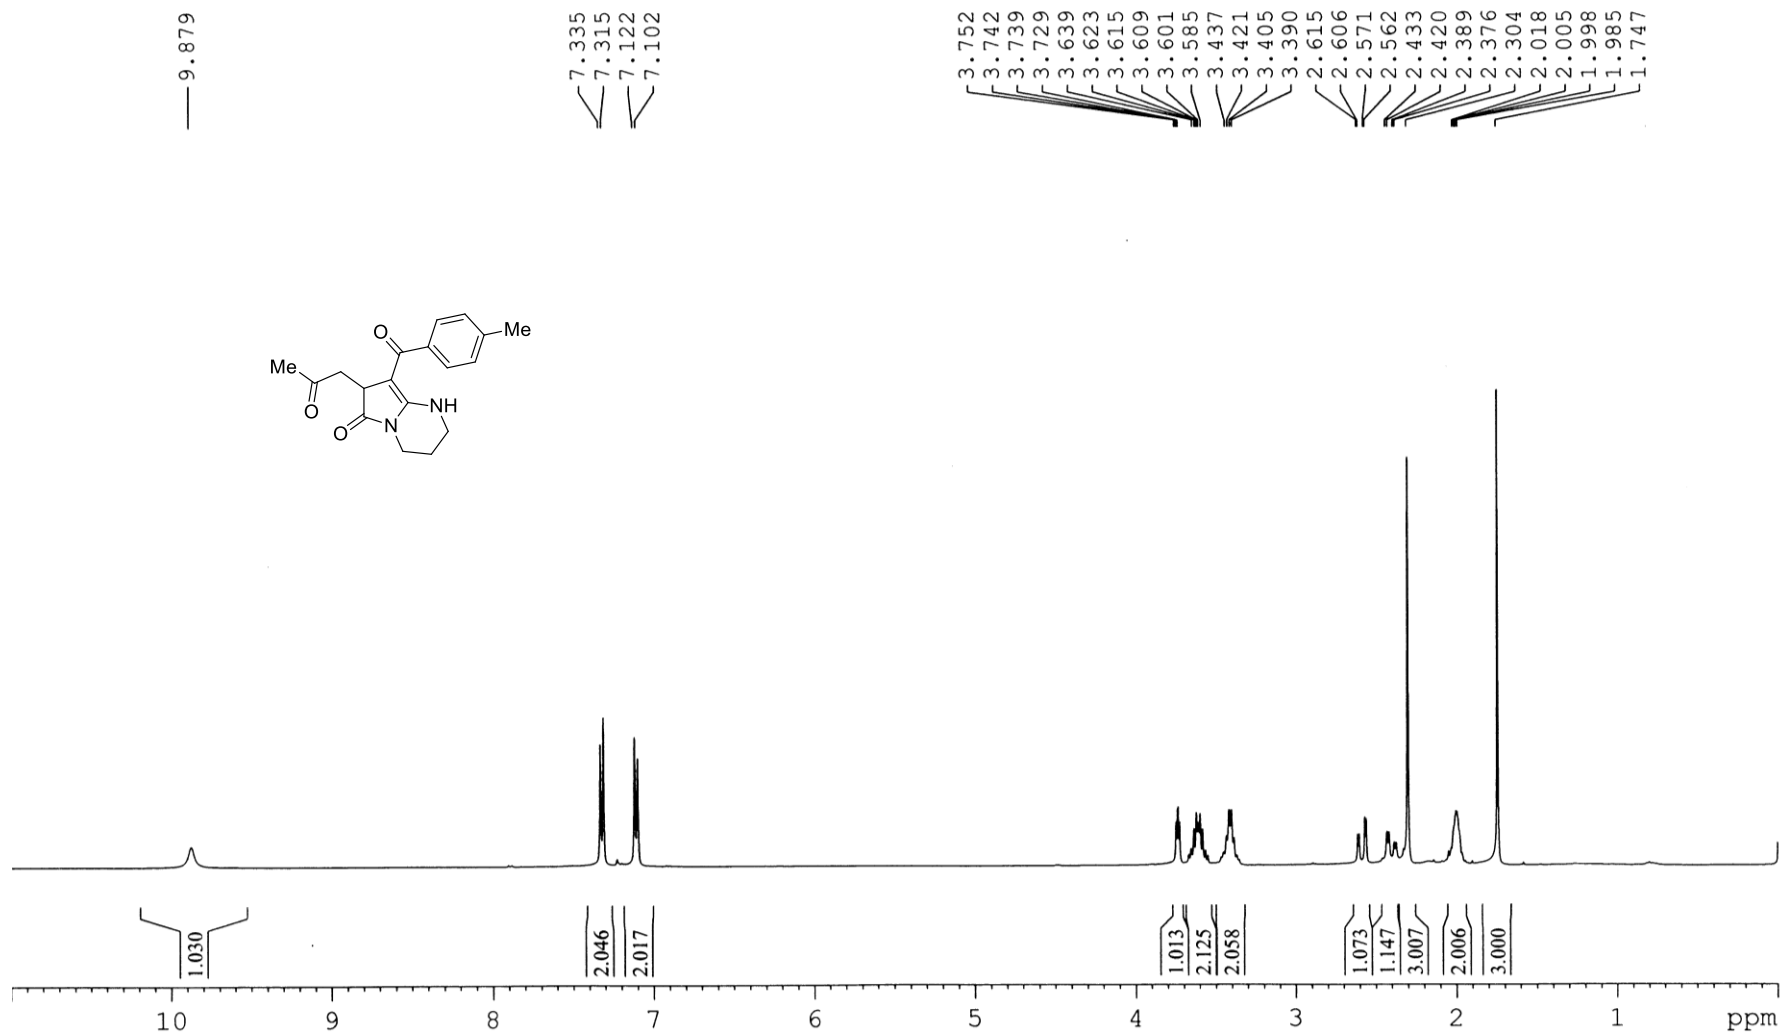

**Figure 15.** <sup>1</sup>H NMR (400 MHz, CDCl<sub>3</sub>) spectra of compound **5h**

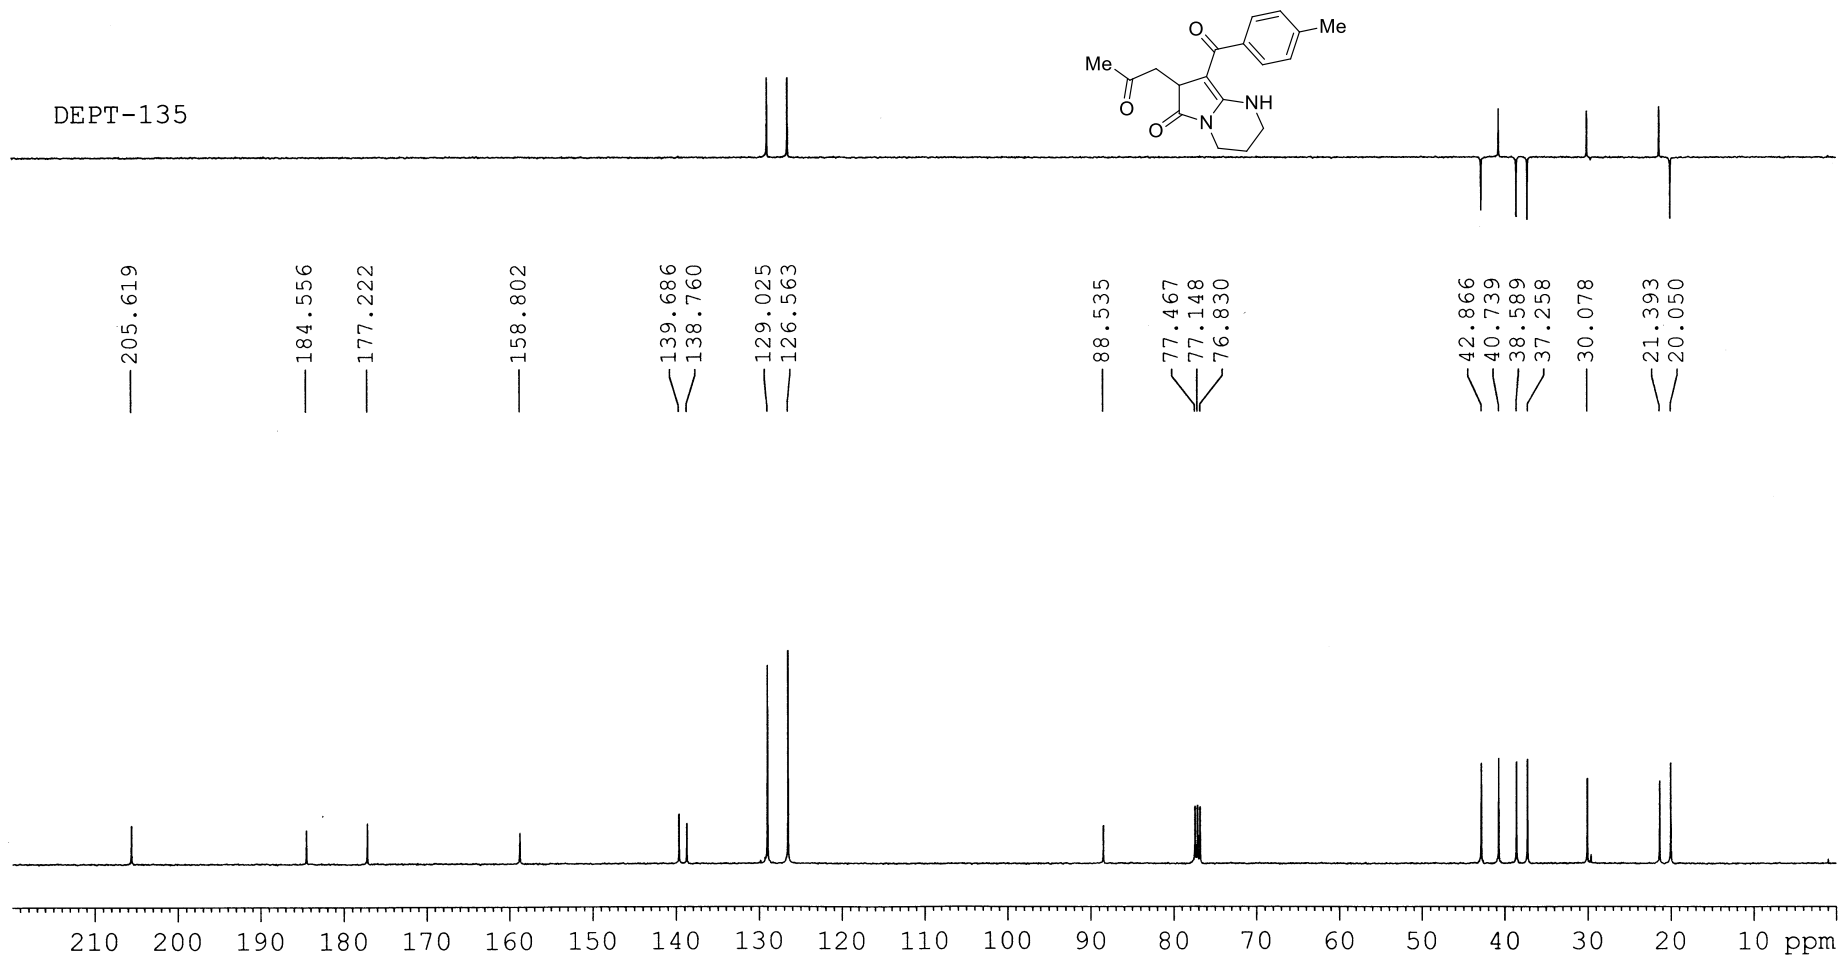

**Figure 16.**  $^{13}\text{C}$  NMR (100 MHz,  $\text{CDCl}_3$ ) spectra of compound **5h**



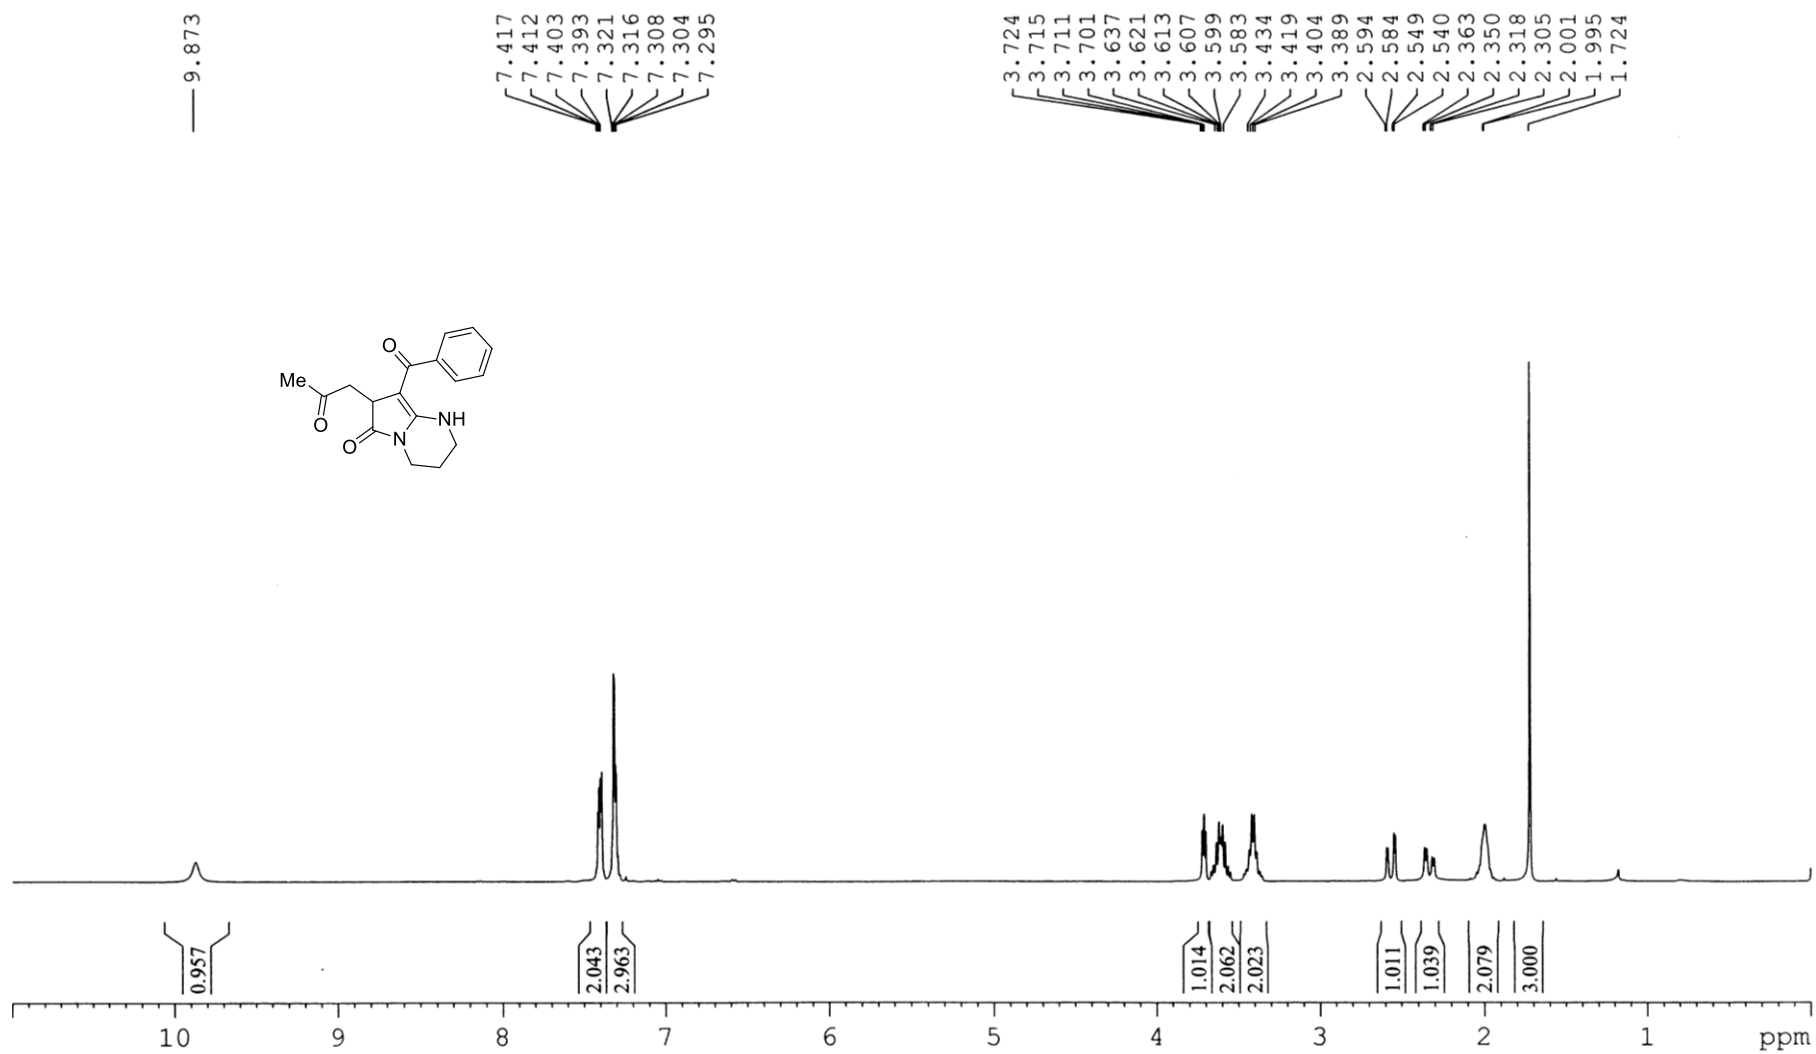

**Figure 17.** <sup>1</sup>H NMR (400 MHz, CDCl<sub>3</sub>) spectra of compound **5i**

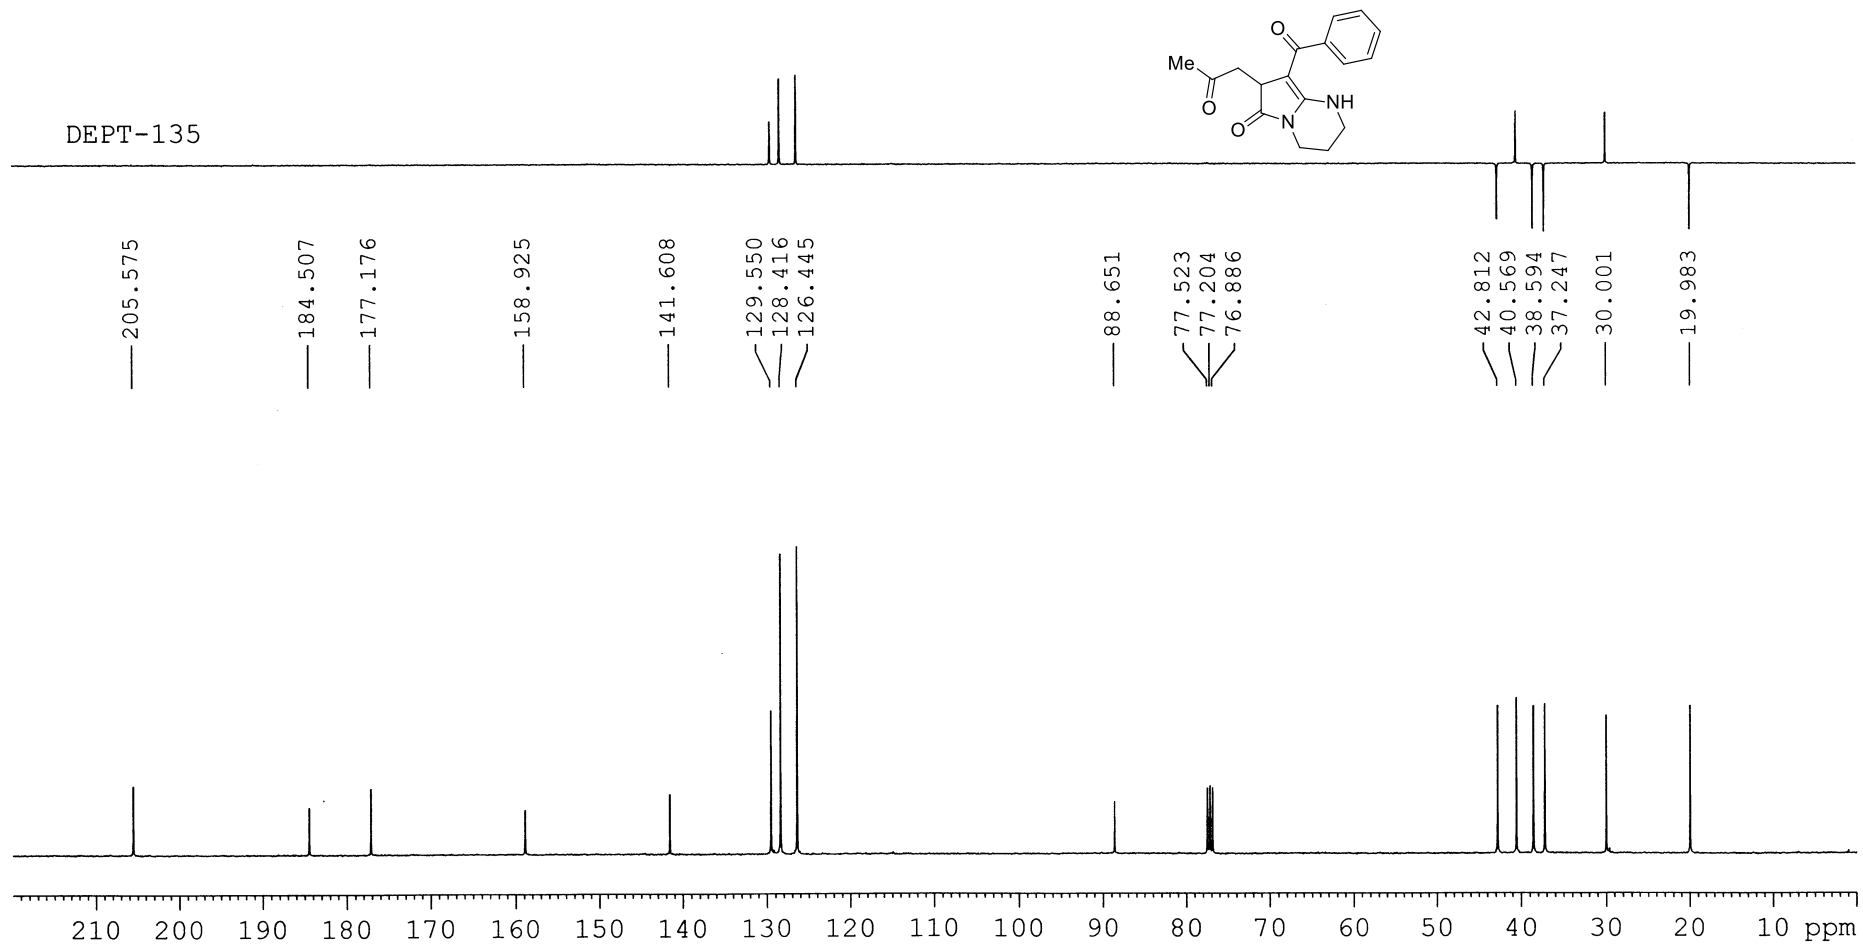

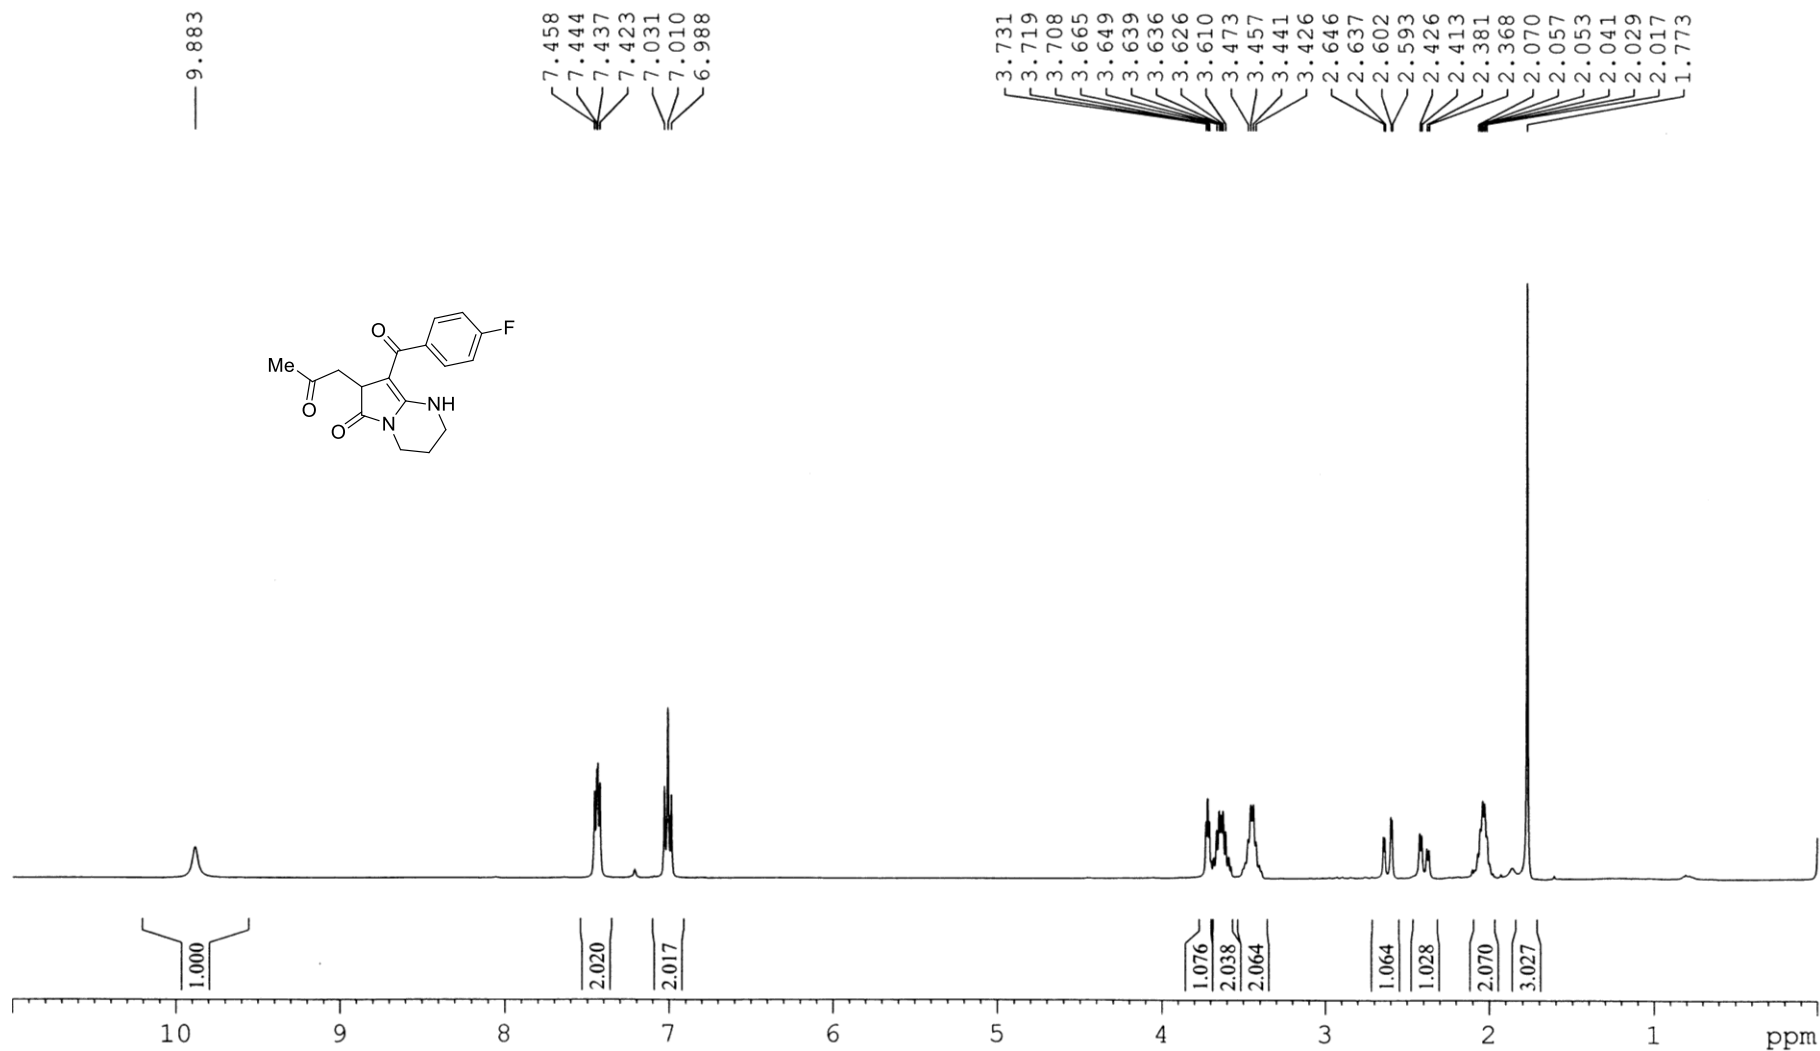

**Figure 19.** <sup>1</sup>H NMR (400 MHz, CDCl<sub>3</sub>) spectra of compound **5j**

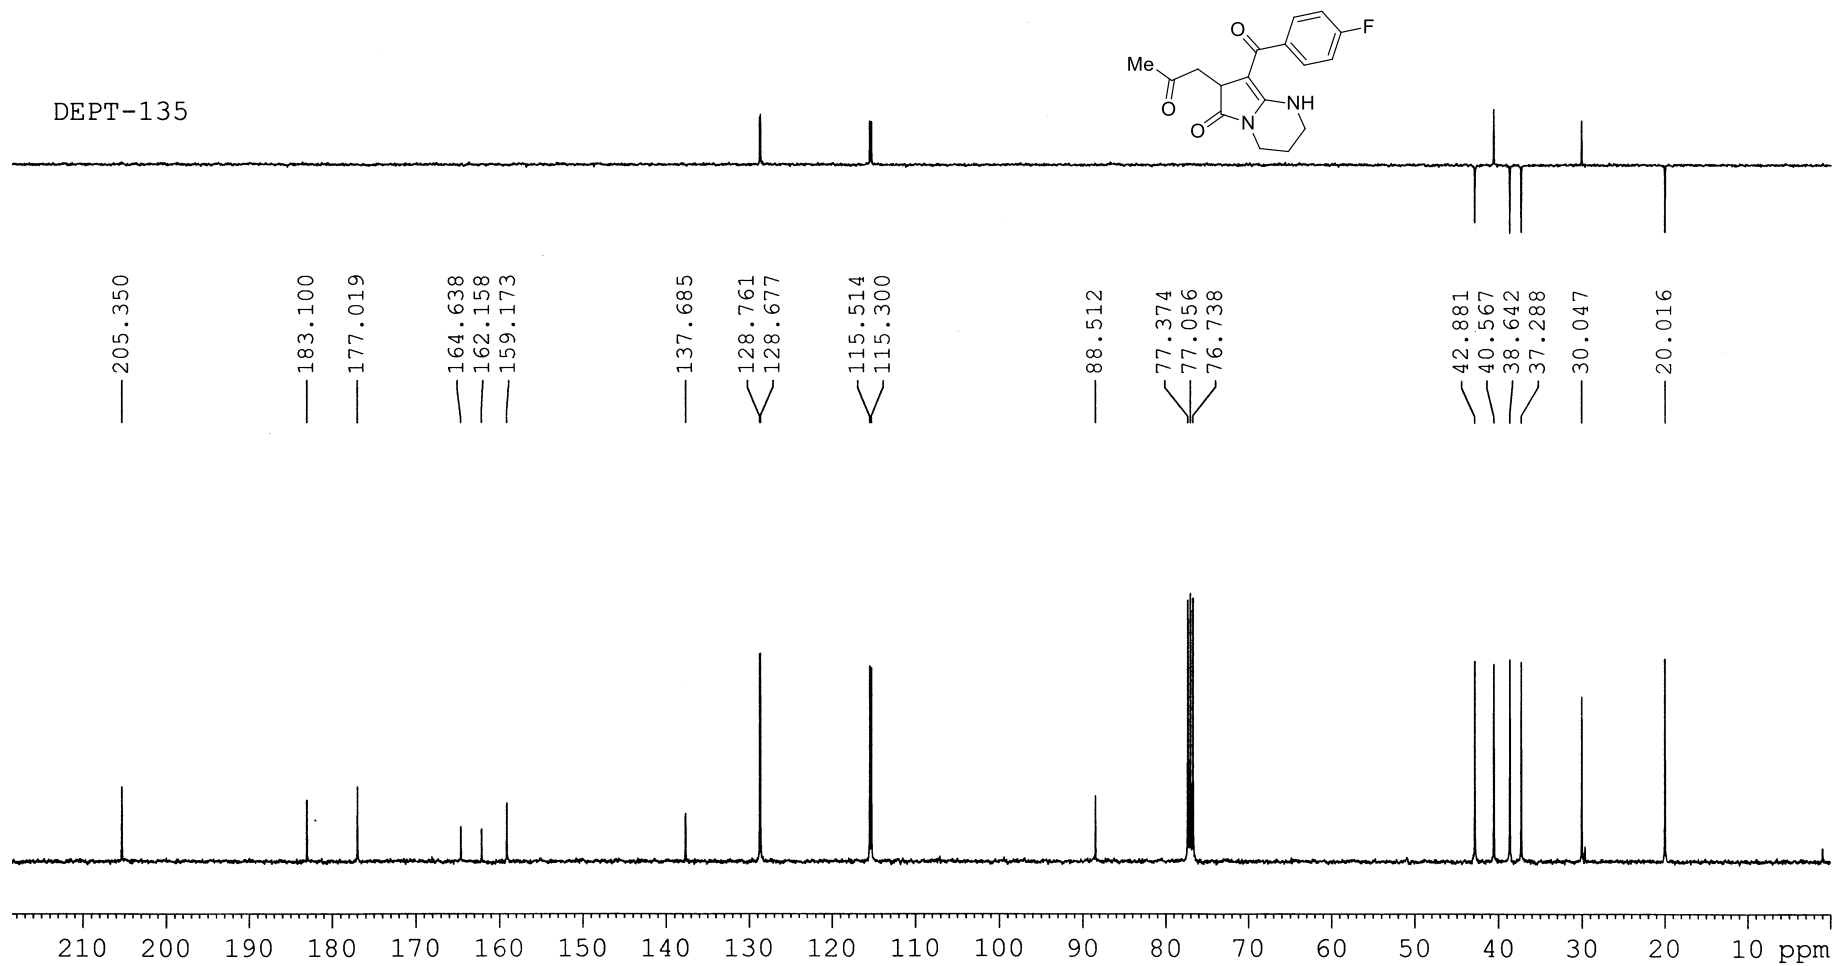

Figure 20.  $^{13}\text{C}$  NMR (100 MHz,  $\text{CDCl}_3$ ) spectra of compound 5j

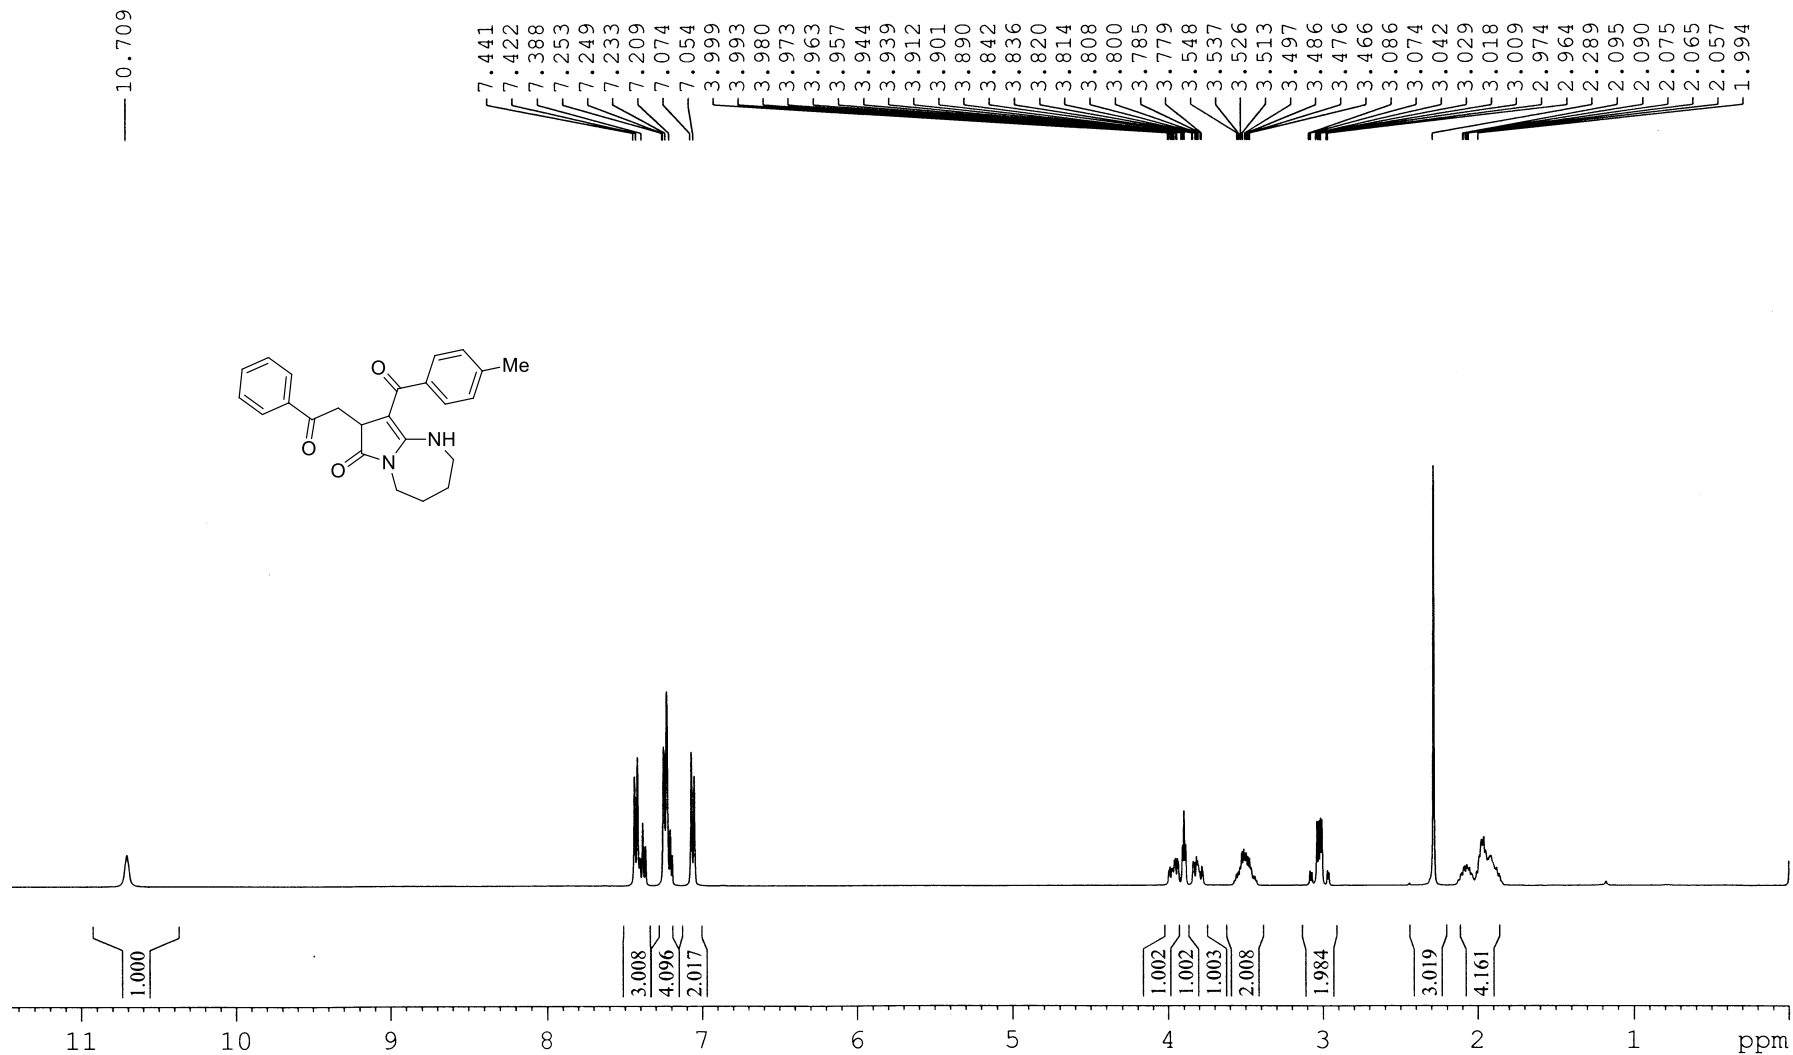

**Figure 21.**  $^1\text{H NMR}$  (400 MHz,  $\text{CDCl}_3$ ) spectra of compound 6a

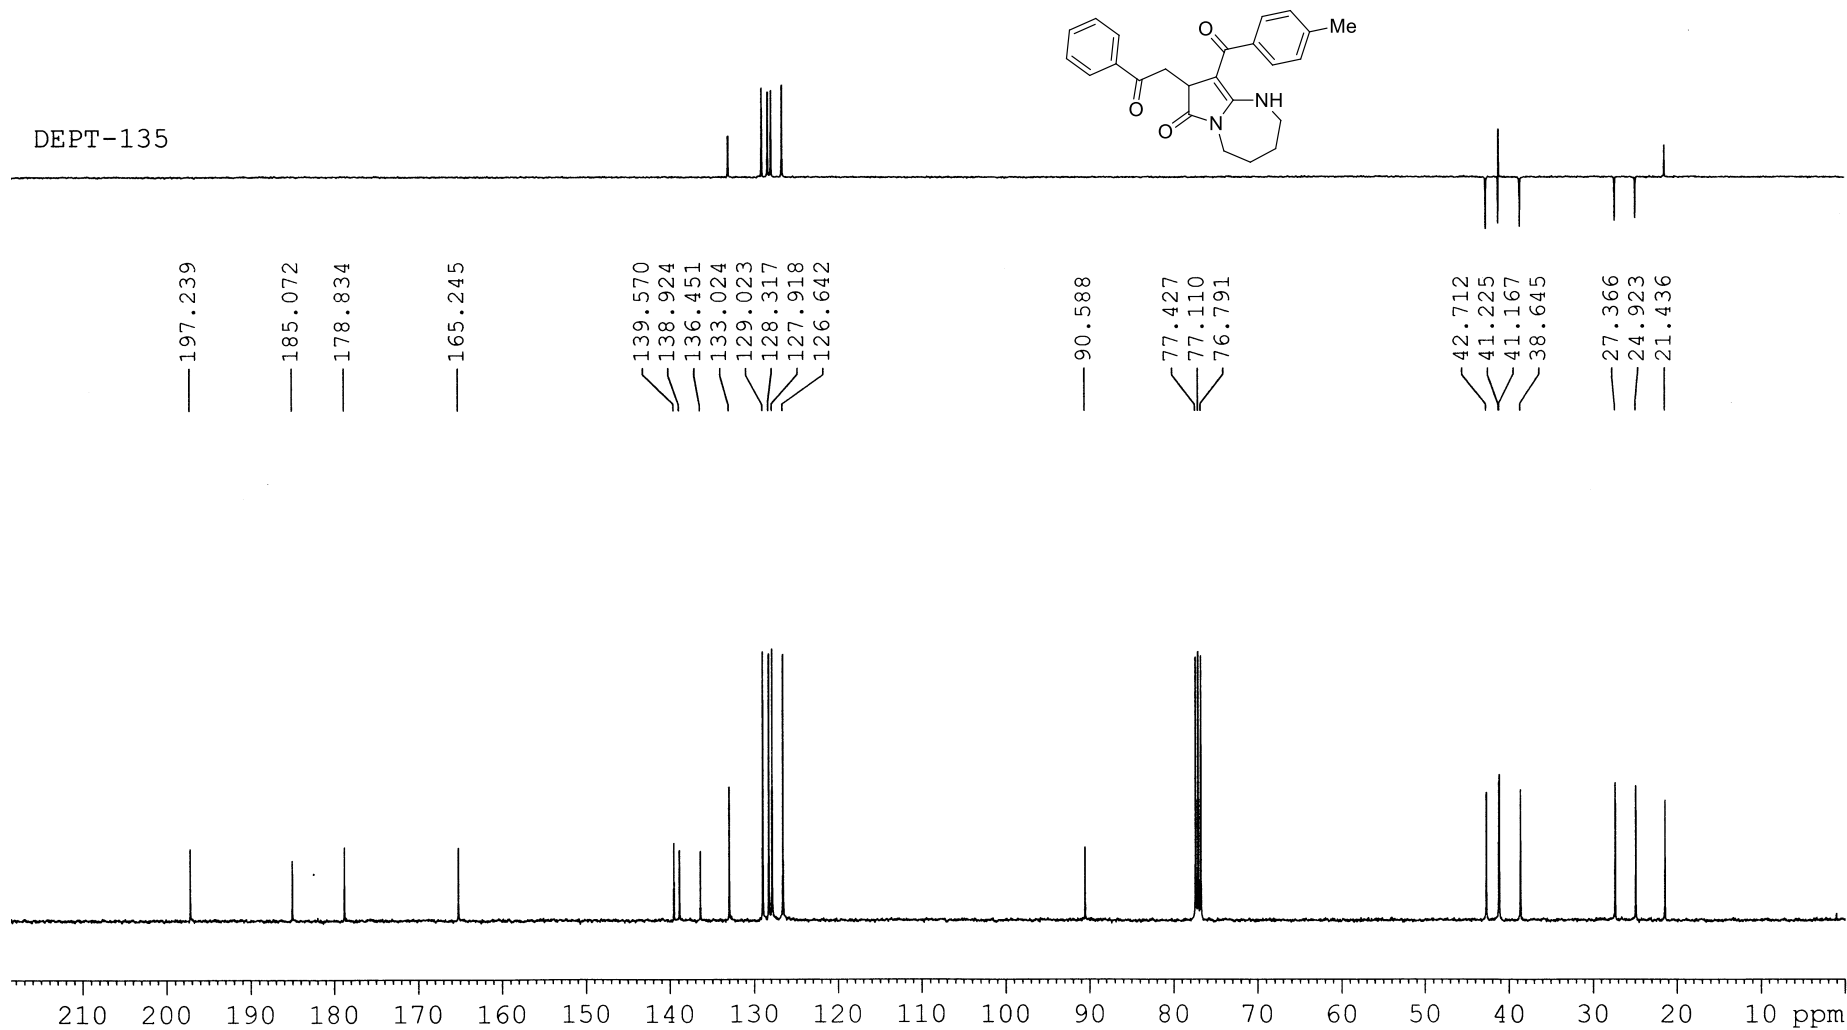

**Figure 22.**  $^{13}\text{C}$  NMR (100 MHz,  $\text{CDCl}_3$ ) spectra of compound **6a**

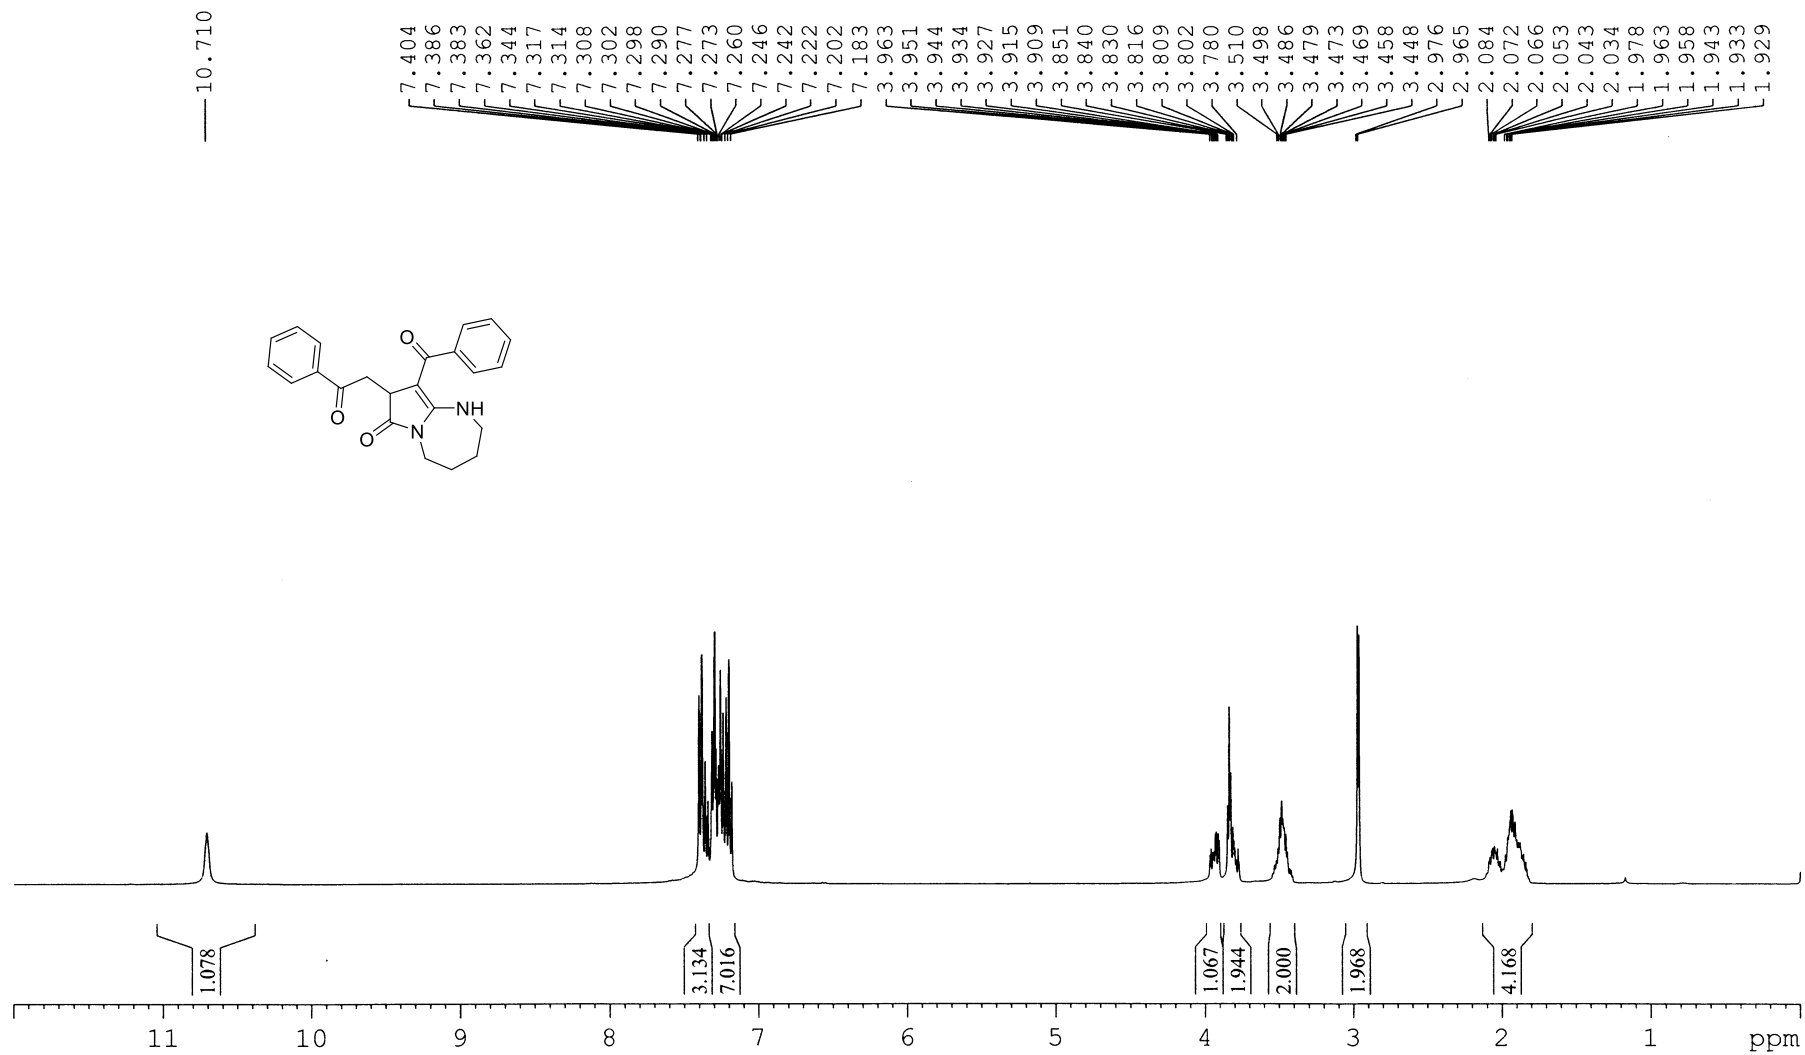

**Figure 23.**  $^1\text{H NMR}$  (400 MHz,  $\text{CDCl}_3$ ) spectra of compound **6b**

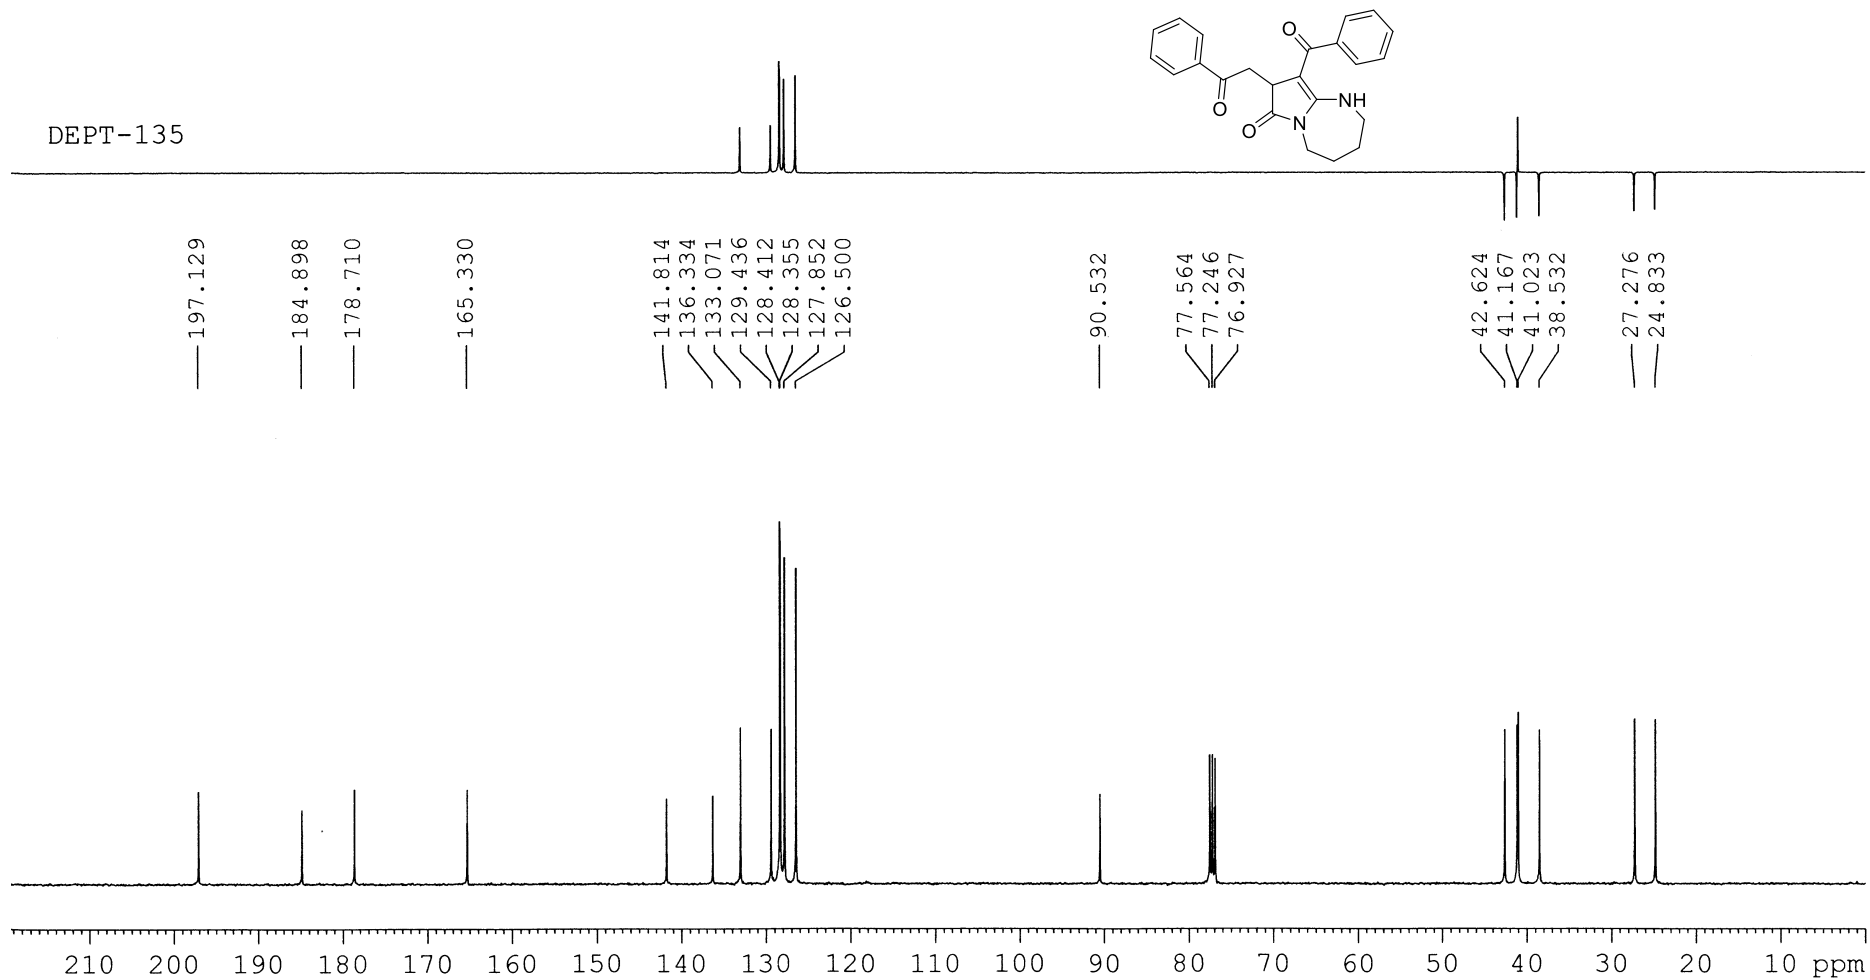

**Figure 24.**  $^{13}\text{C}$  NMR (100 MHz,  $\text{CDCl}_3$ ) spectra of compound **6b**



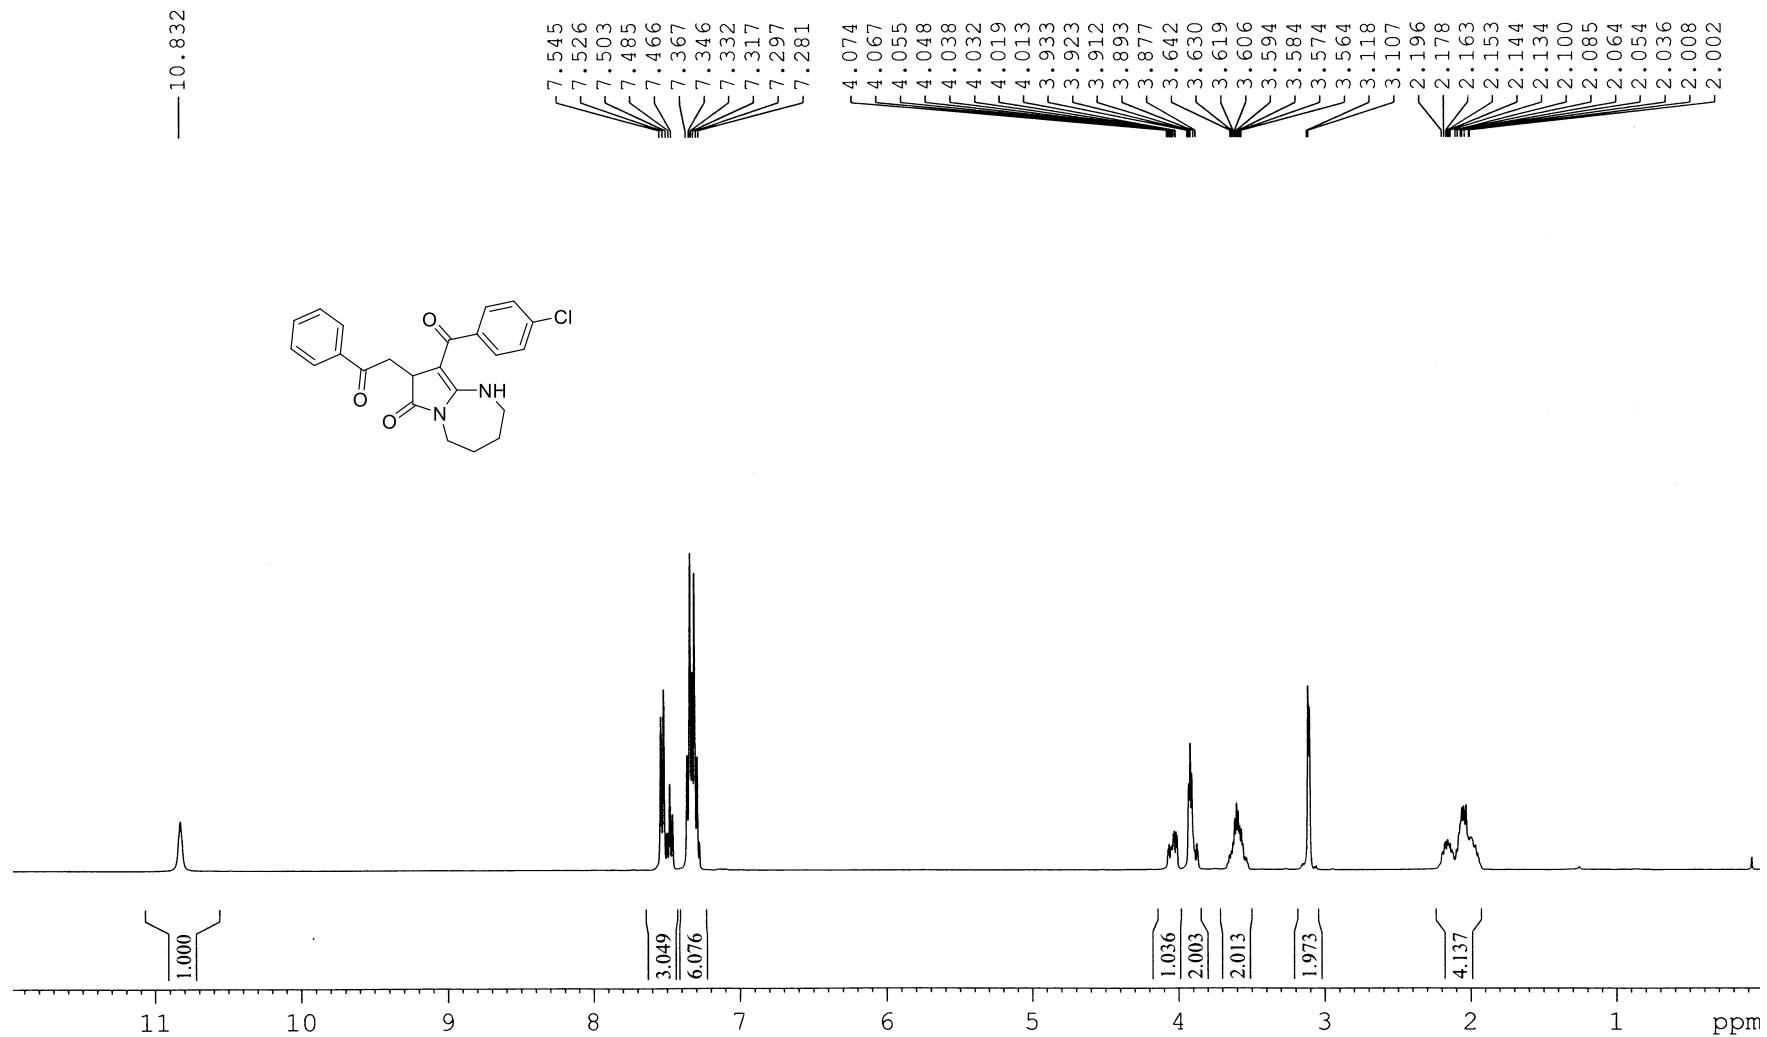

**Figure 25.**  $^1\text{H NMR}$  (400 MHz,  $\text{CDCl}_3$ ) spectra of compound **6c**

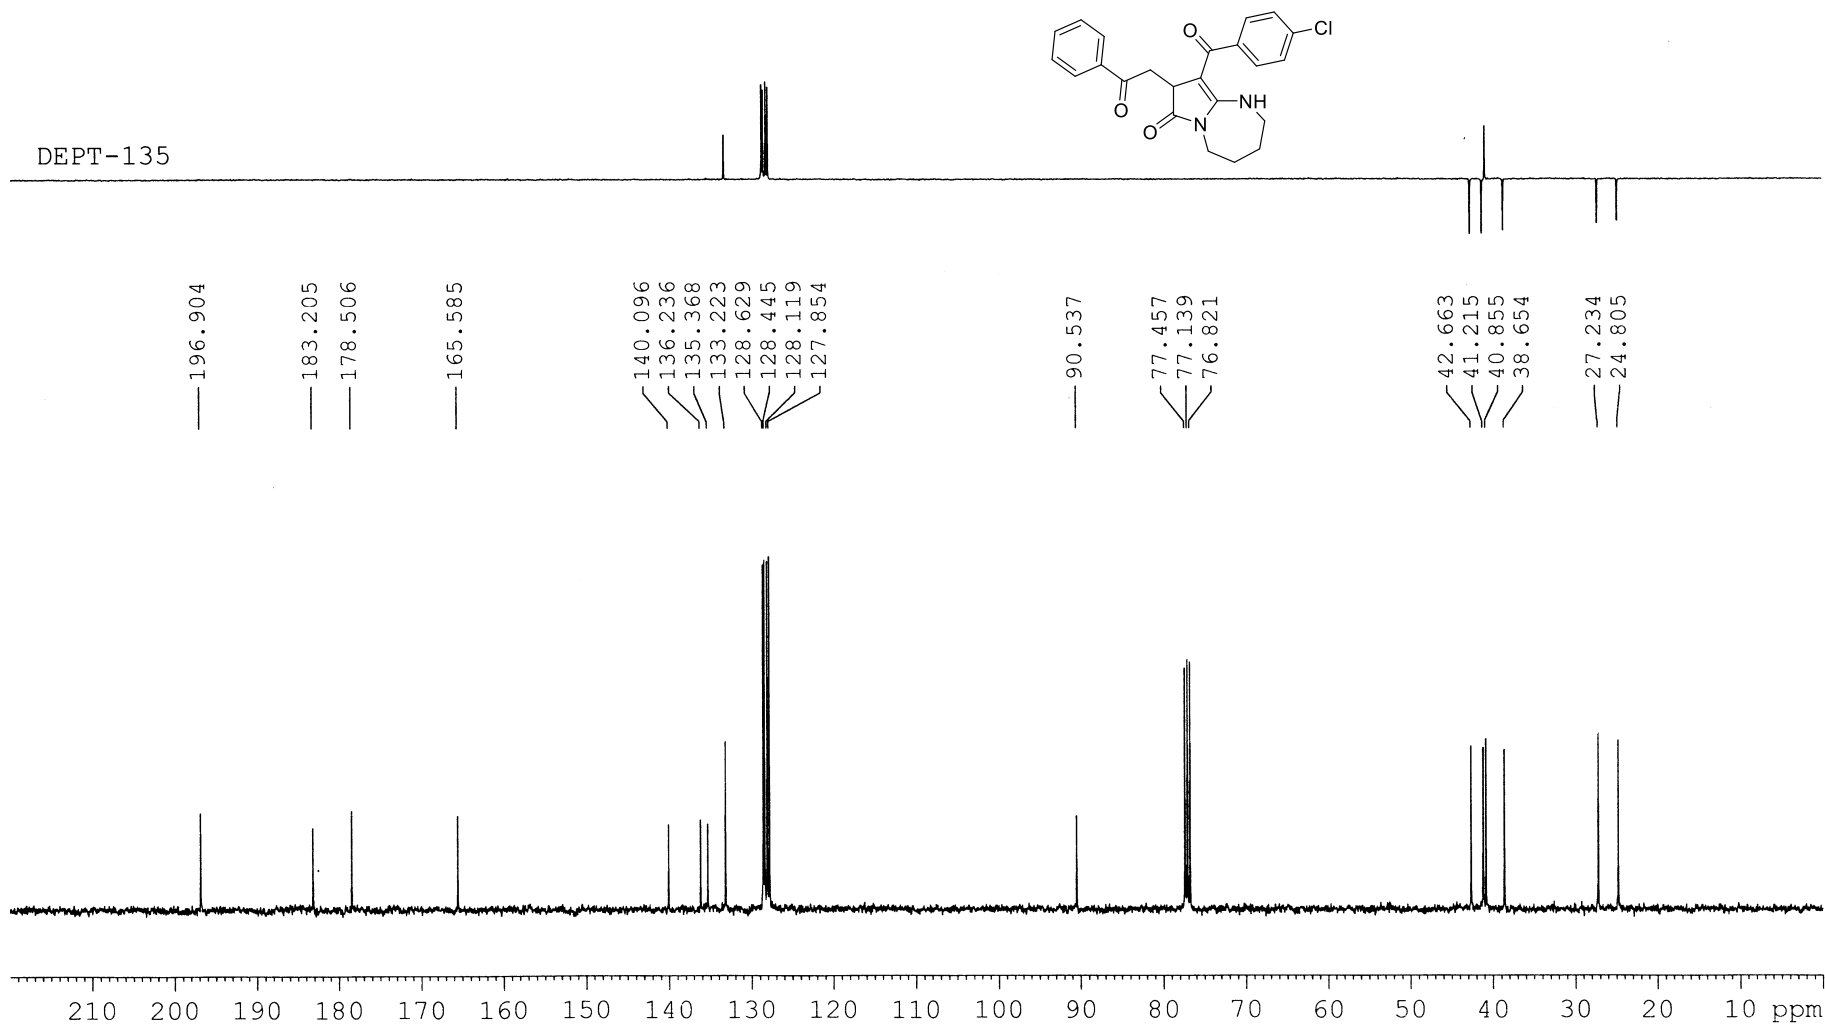

Figure 26.  $^{13}\text{C}$  NMR (100 MHz,  $\text{CDCl}_3$ ) spectra of compound **6c**

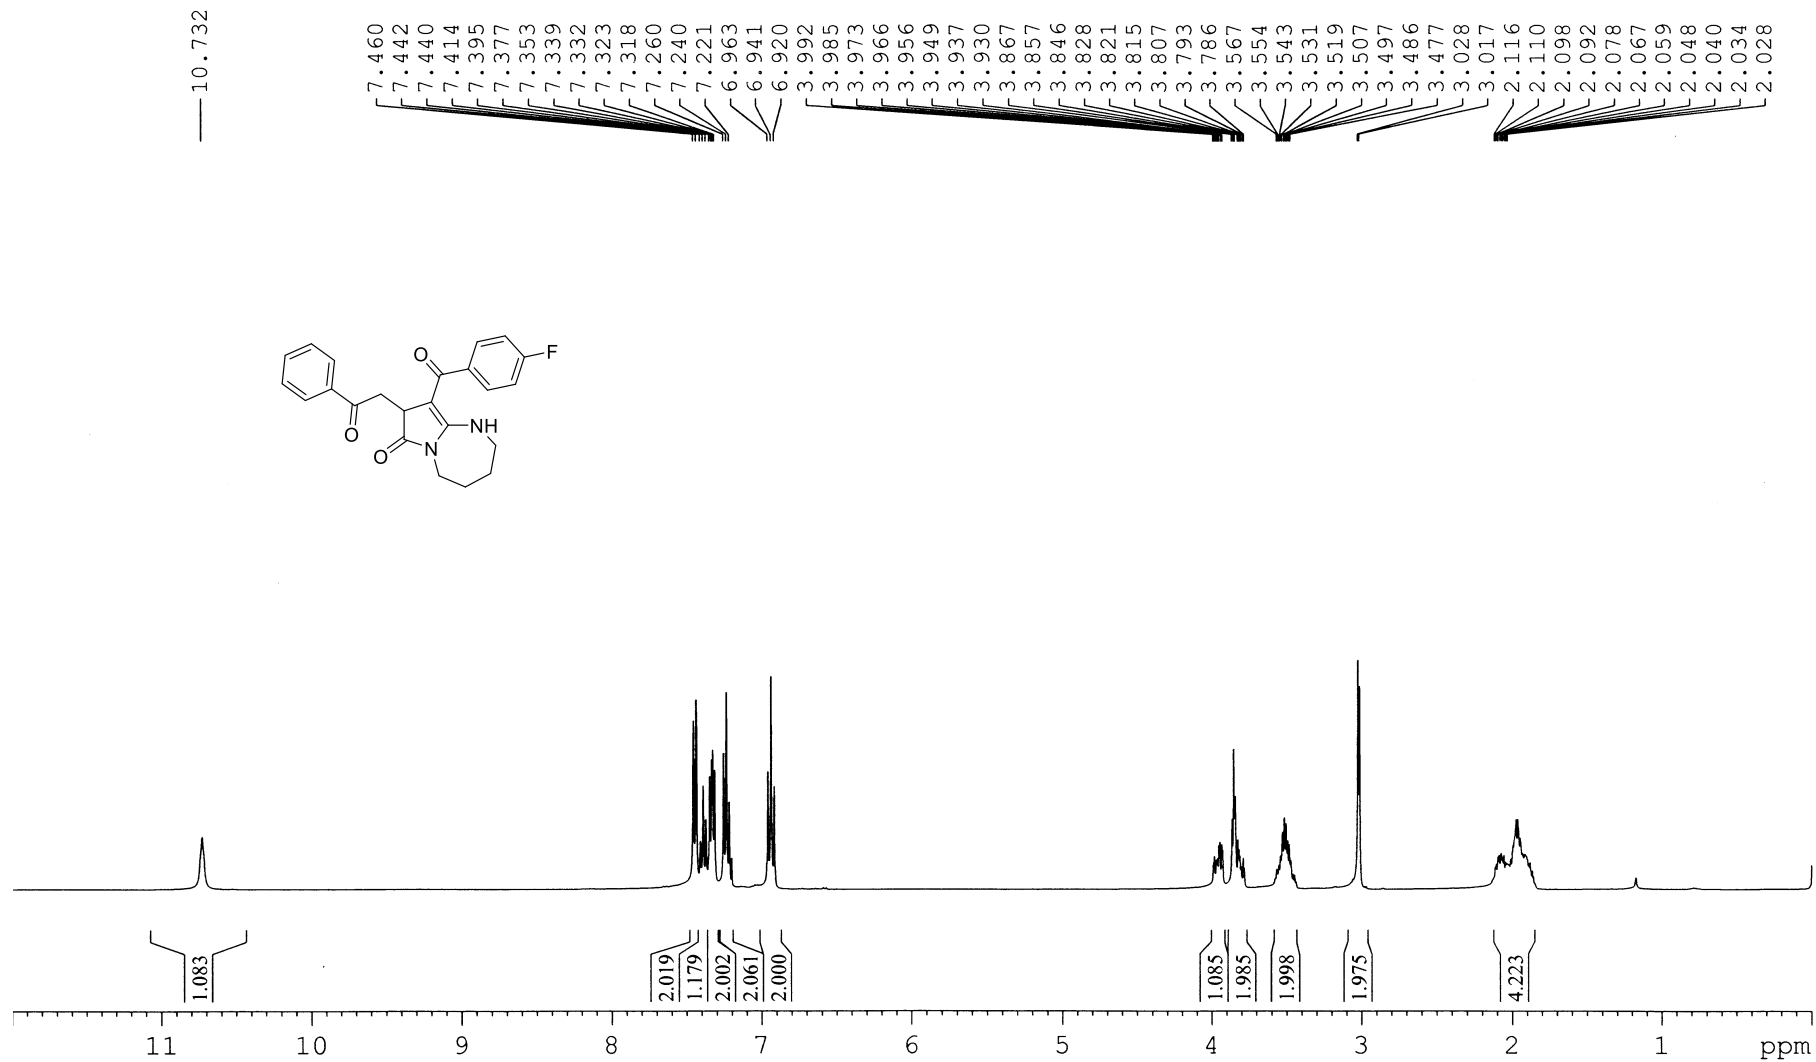

**Figure 27.**  $^1\text{H NMR}$  (400 MHz,  $\text{CDCl}_3$ ) spectra of compound **6d**

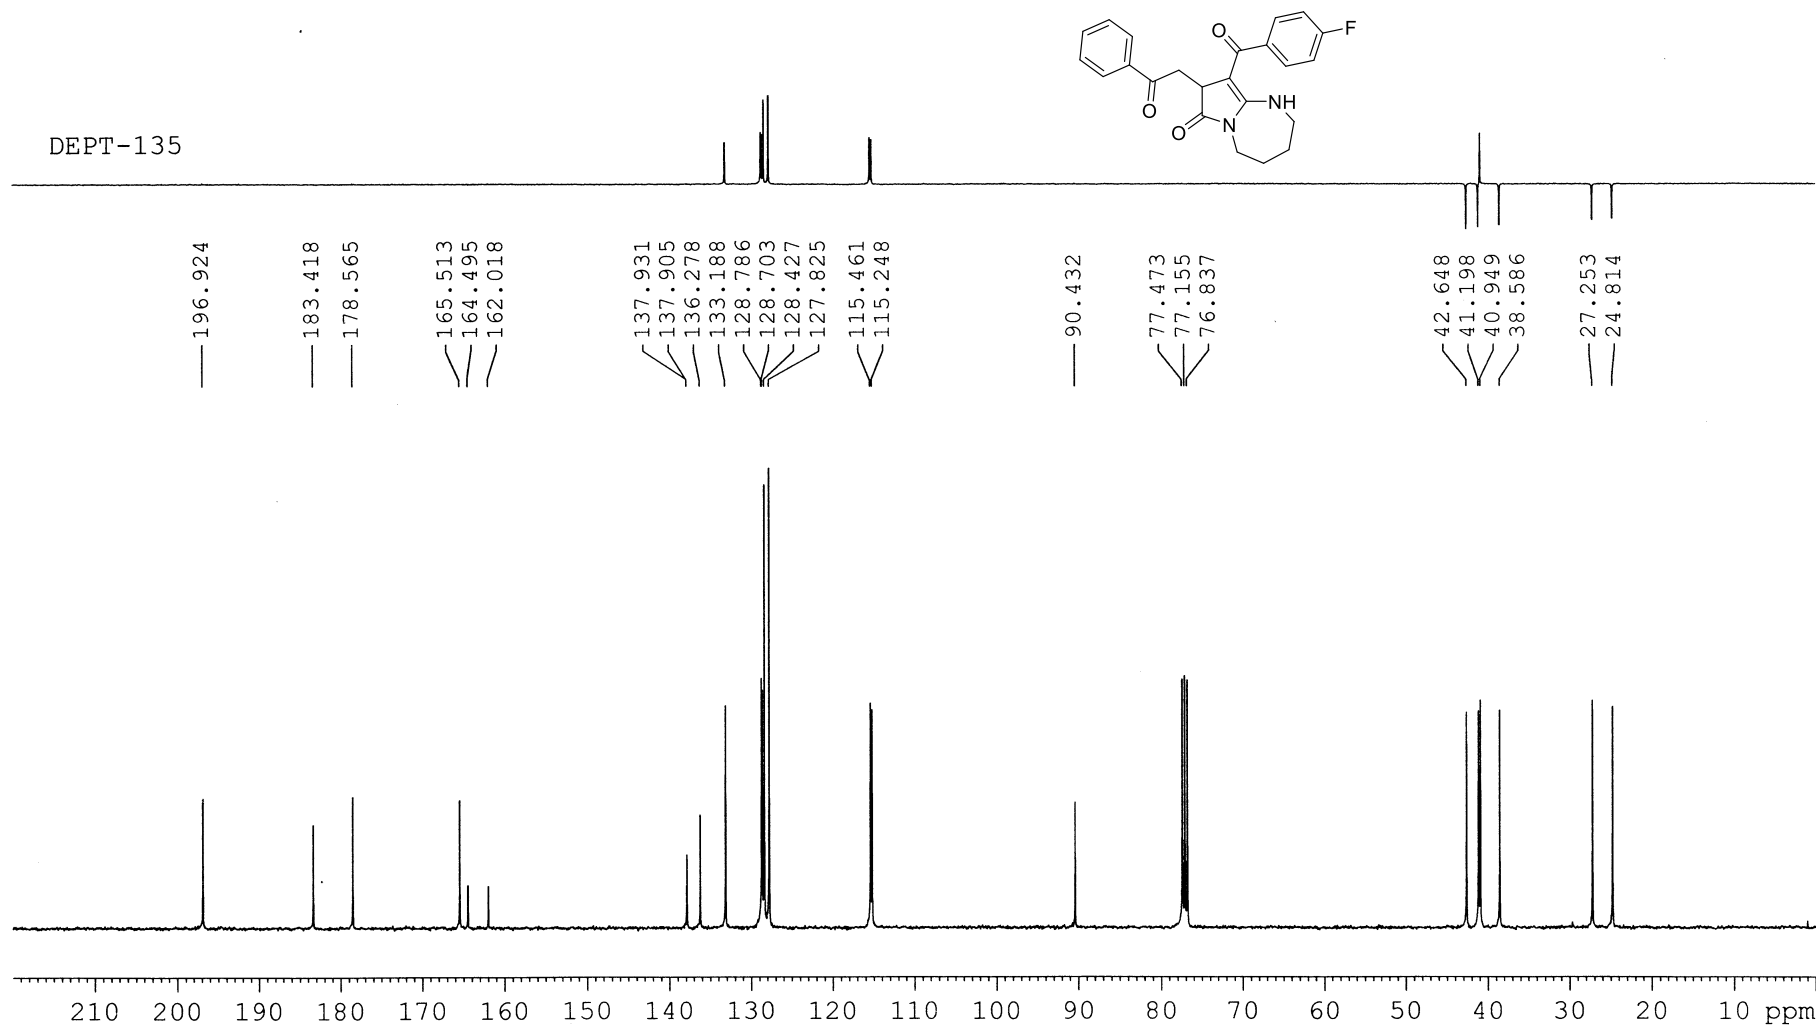

**Figure 28.**  $^{13}\text{C}$  NMR (100 MHz,  $\text{CDCl}_3$ ) spectra of compound **6d**

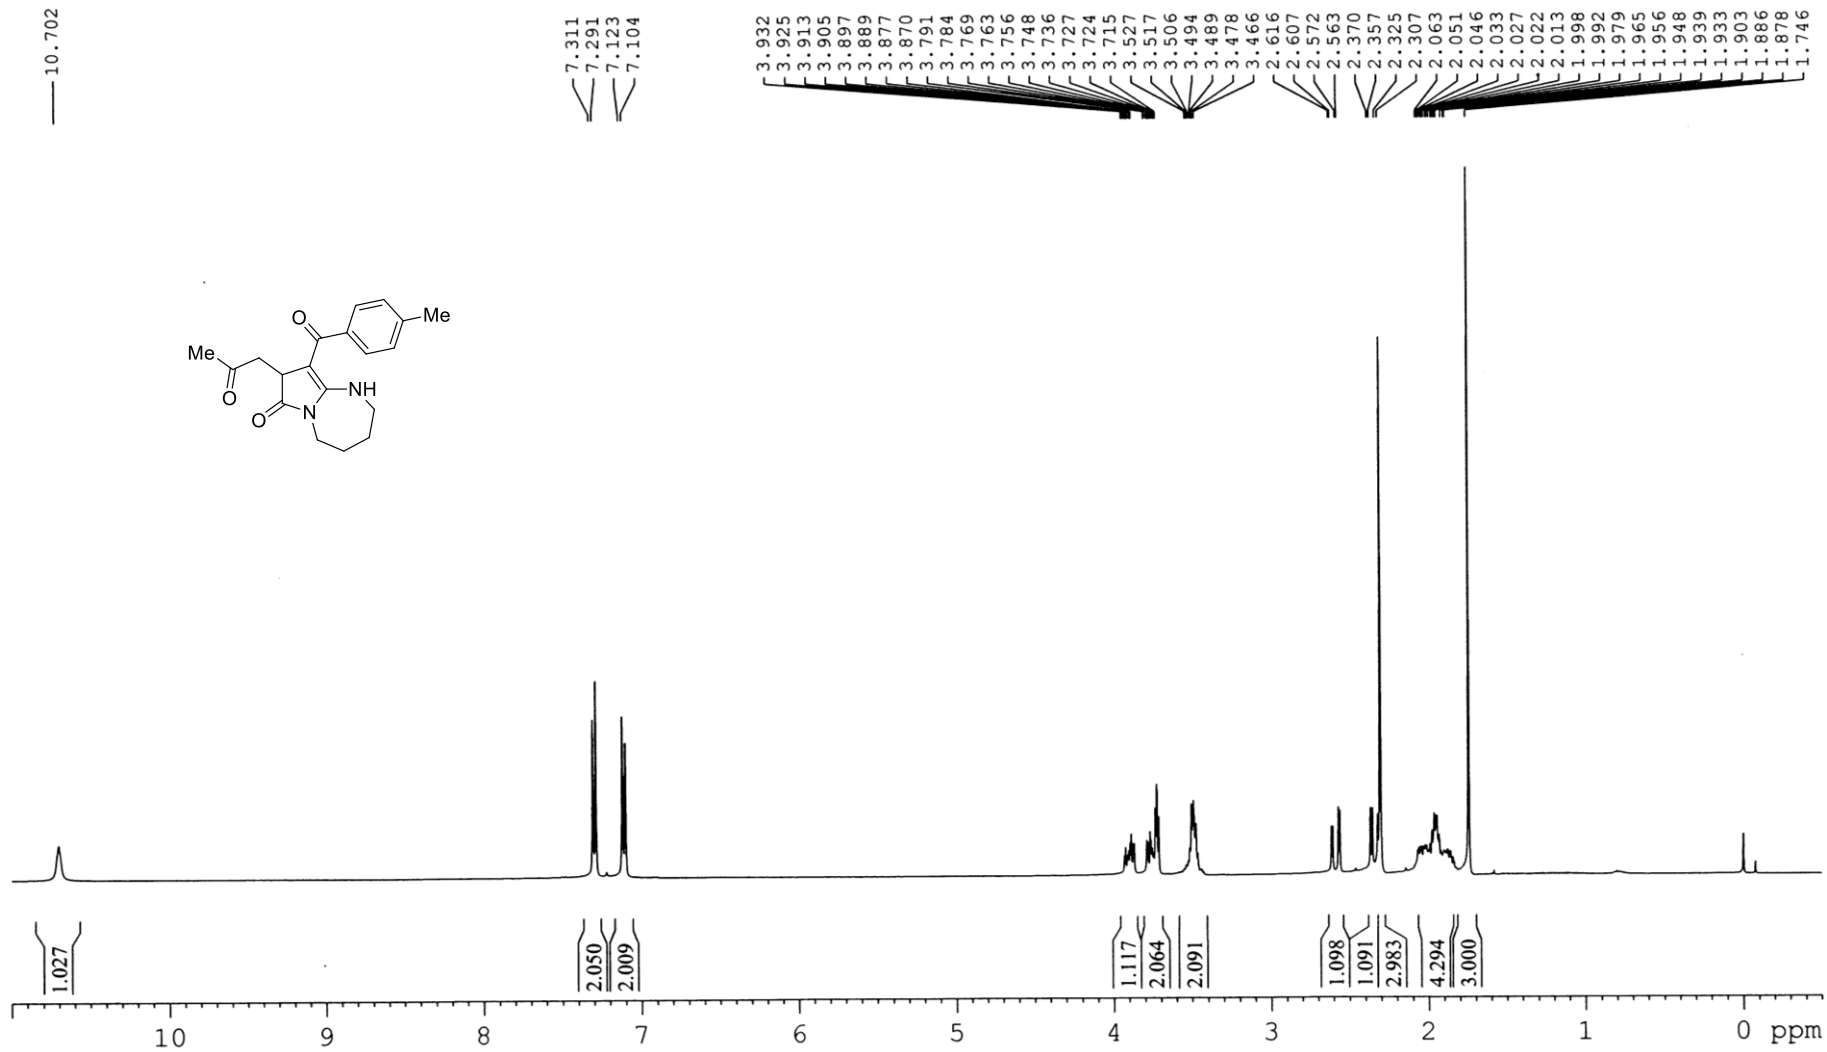

**Figure 29.**  $^1\text{H}$  NMR (400 MHz,  $\text{CDCl}_3$ ) spectra of compound **6e**

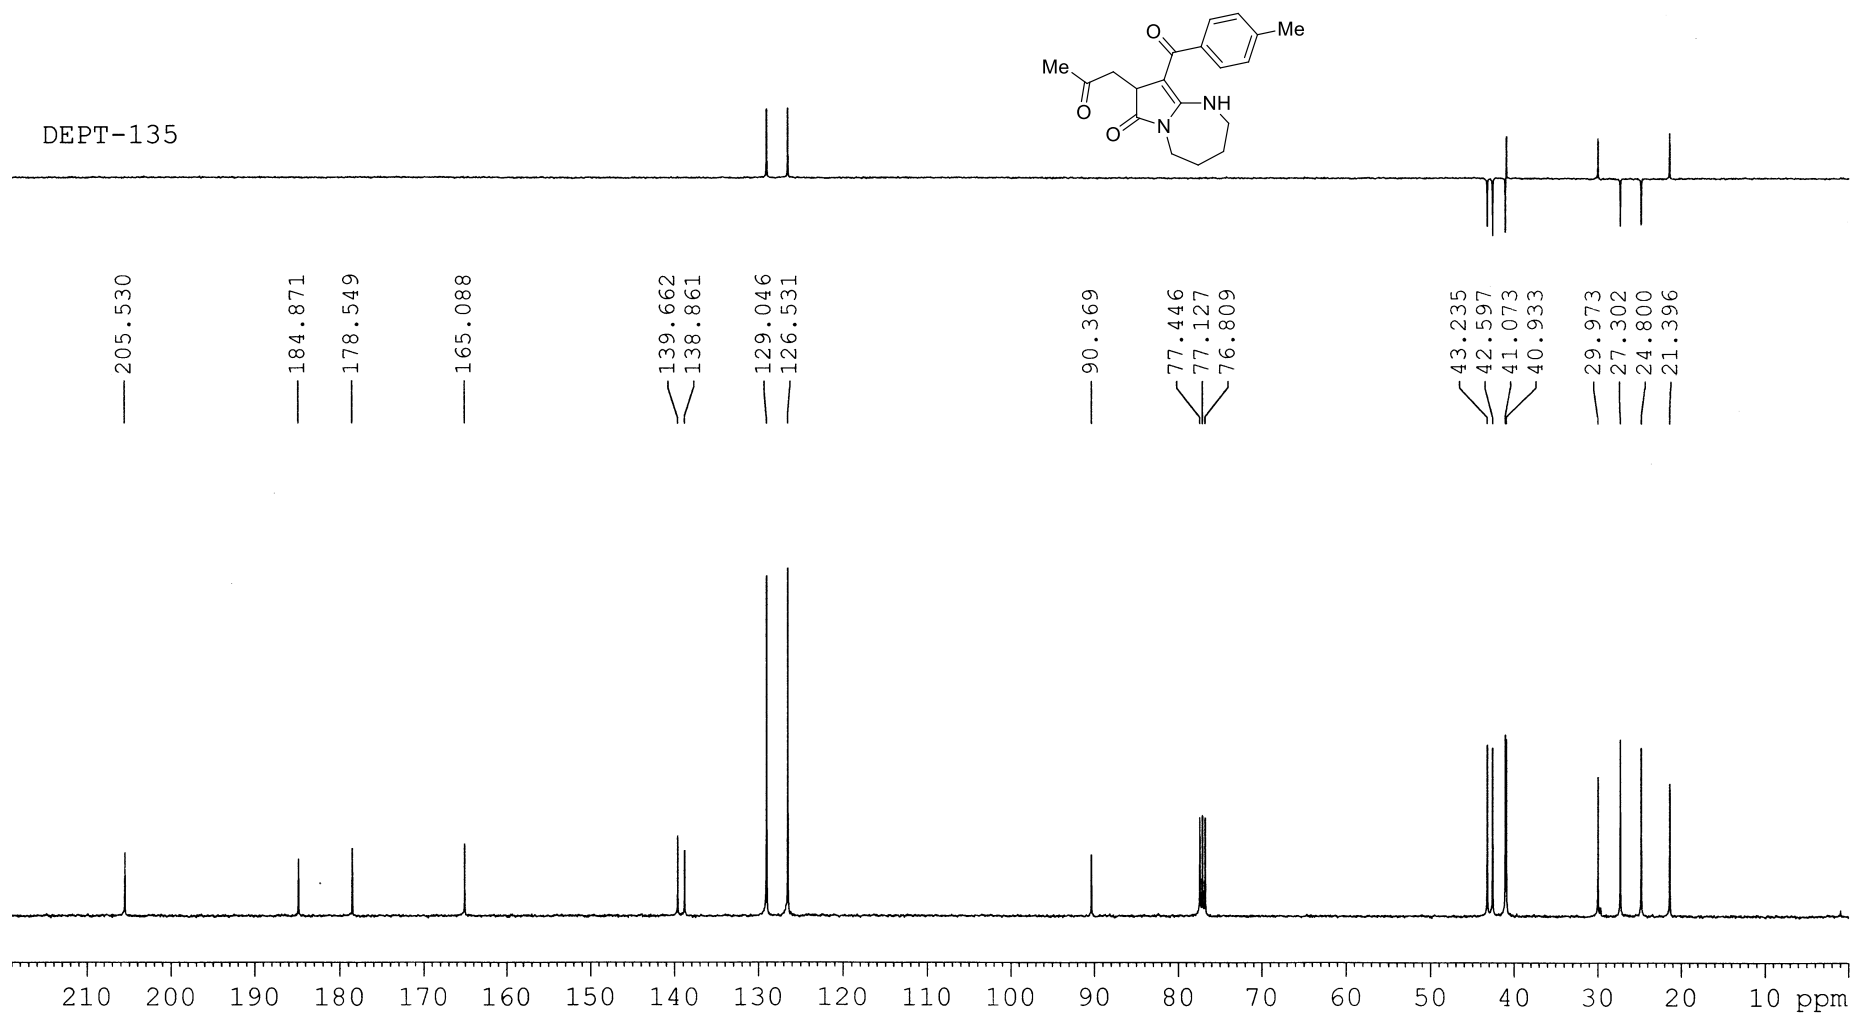

**Figure 30.**  $^{13}\text{C}$  NMR (100 MHz,  $\text{CDCl}_3$ ) spectra of compound **6e**

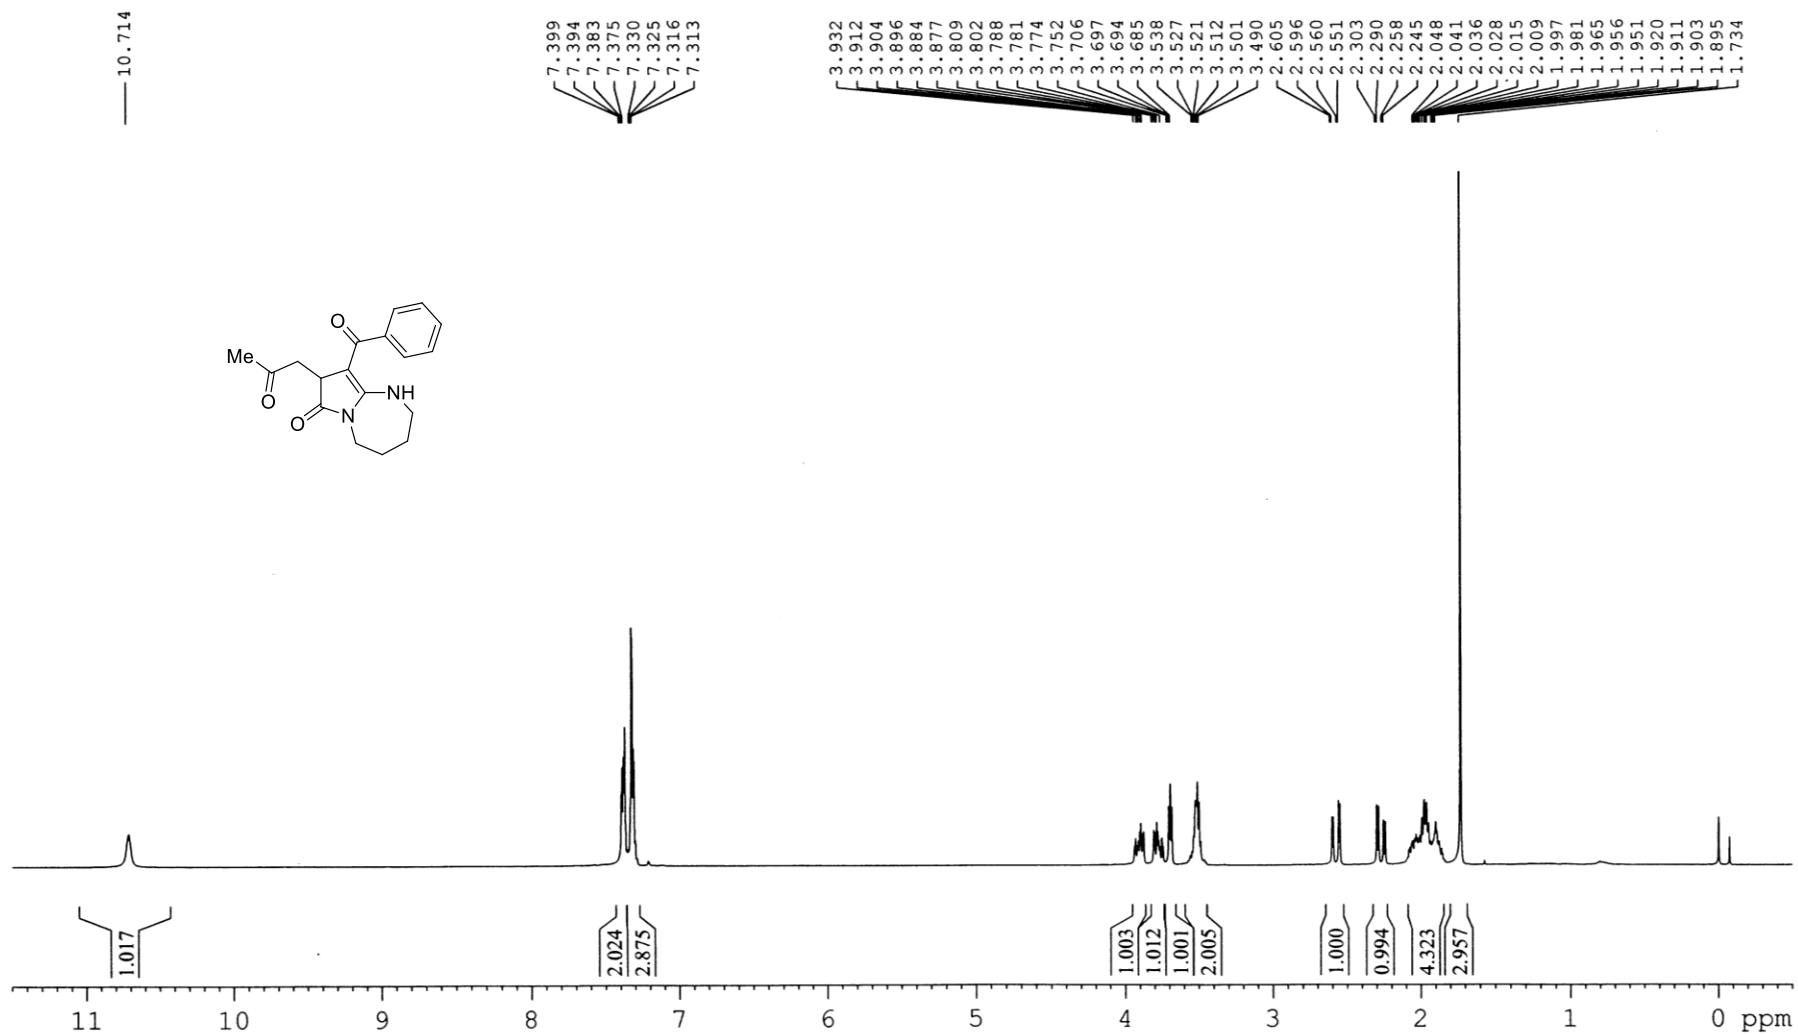

**Figure 31.**  $^1\text{H NMR}$  (400 MHz,  $\text{CDCl}_3$ ) spectra of compound **6f**

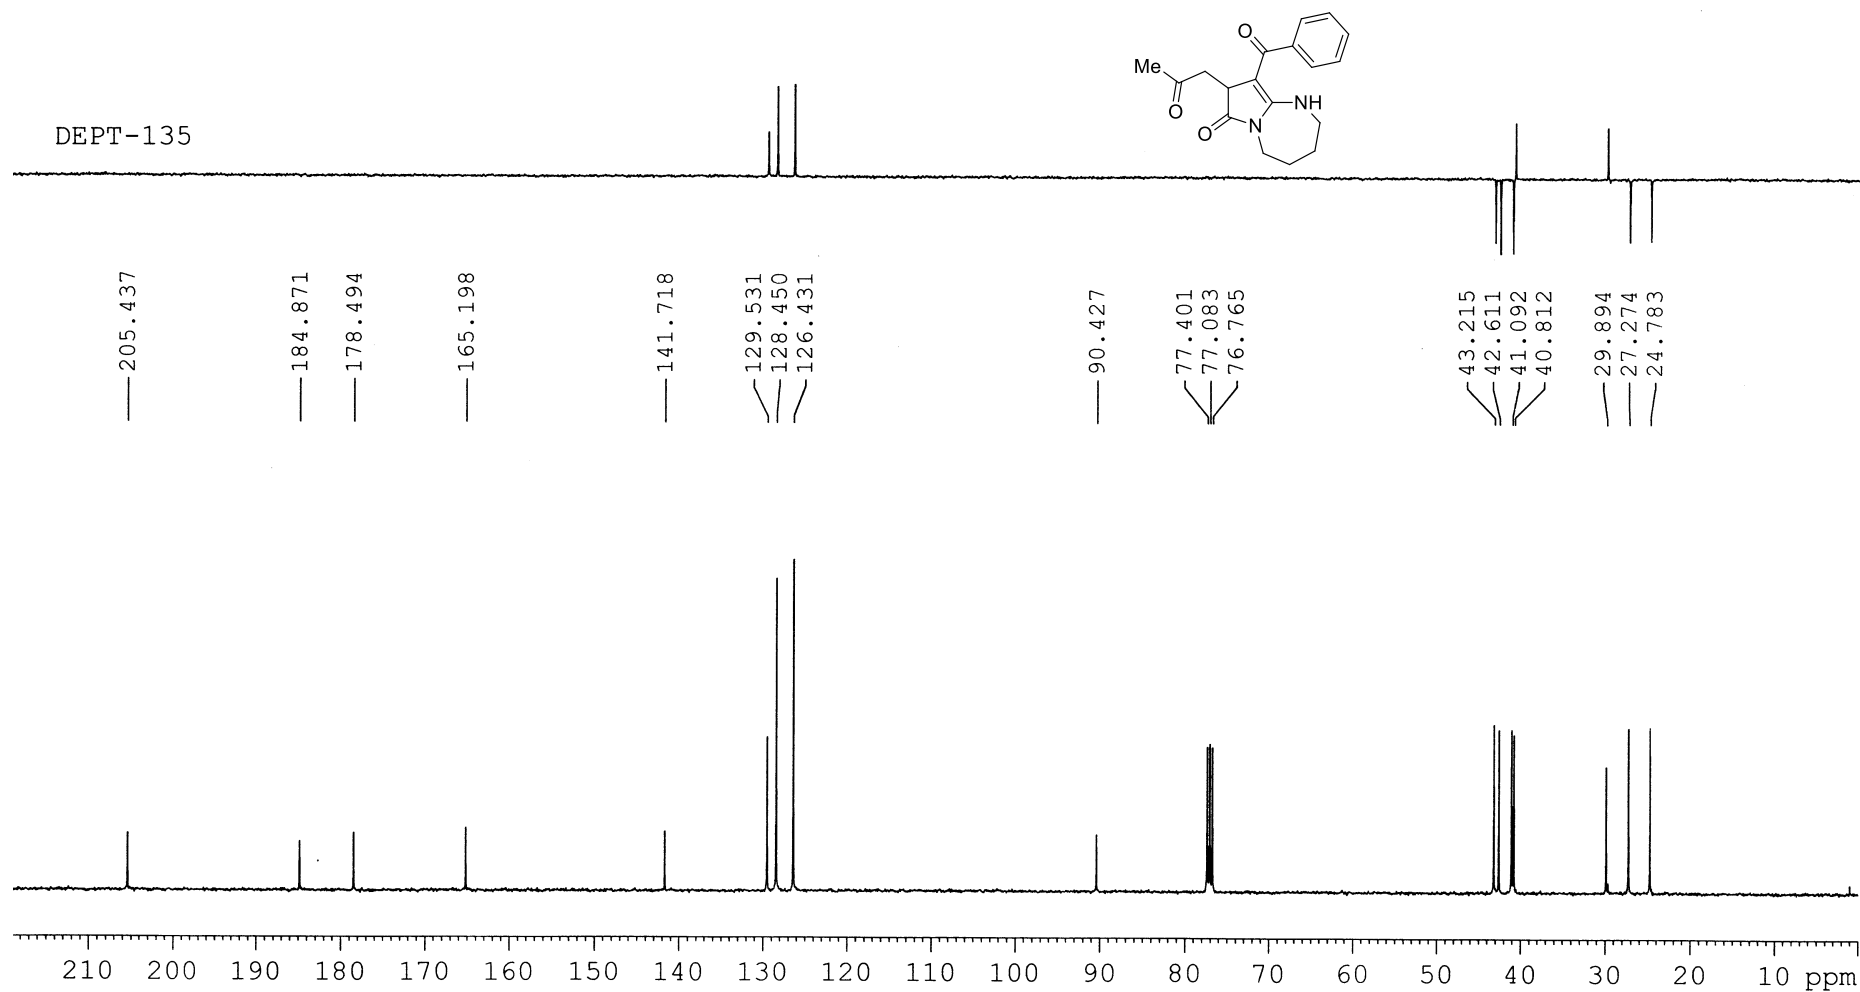

**Figure 32.**  $^{13}\text{C}$  NMR (100 MHz,  $\text{CDCl}_3$ ) spectra of compound **6f**



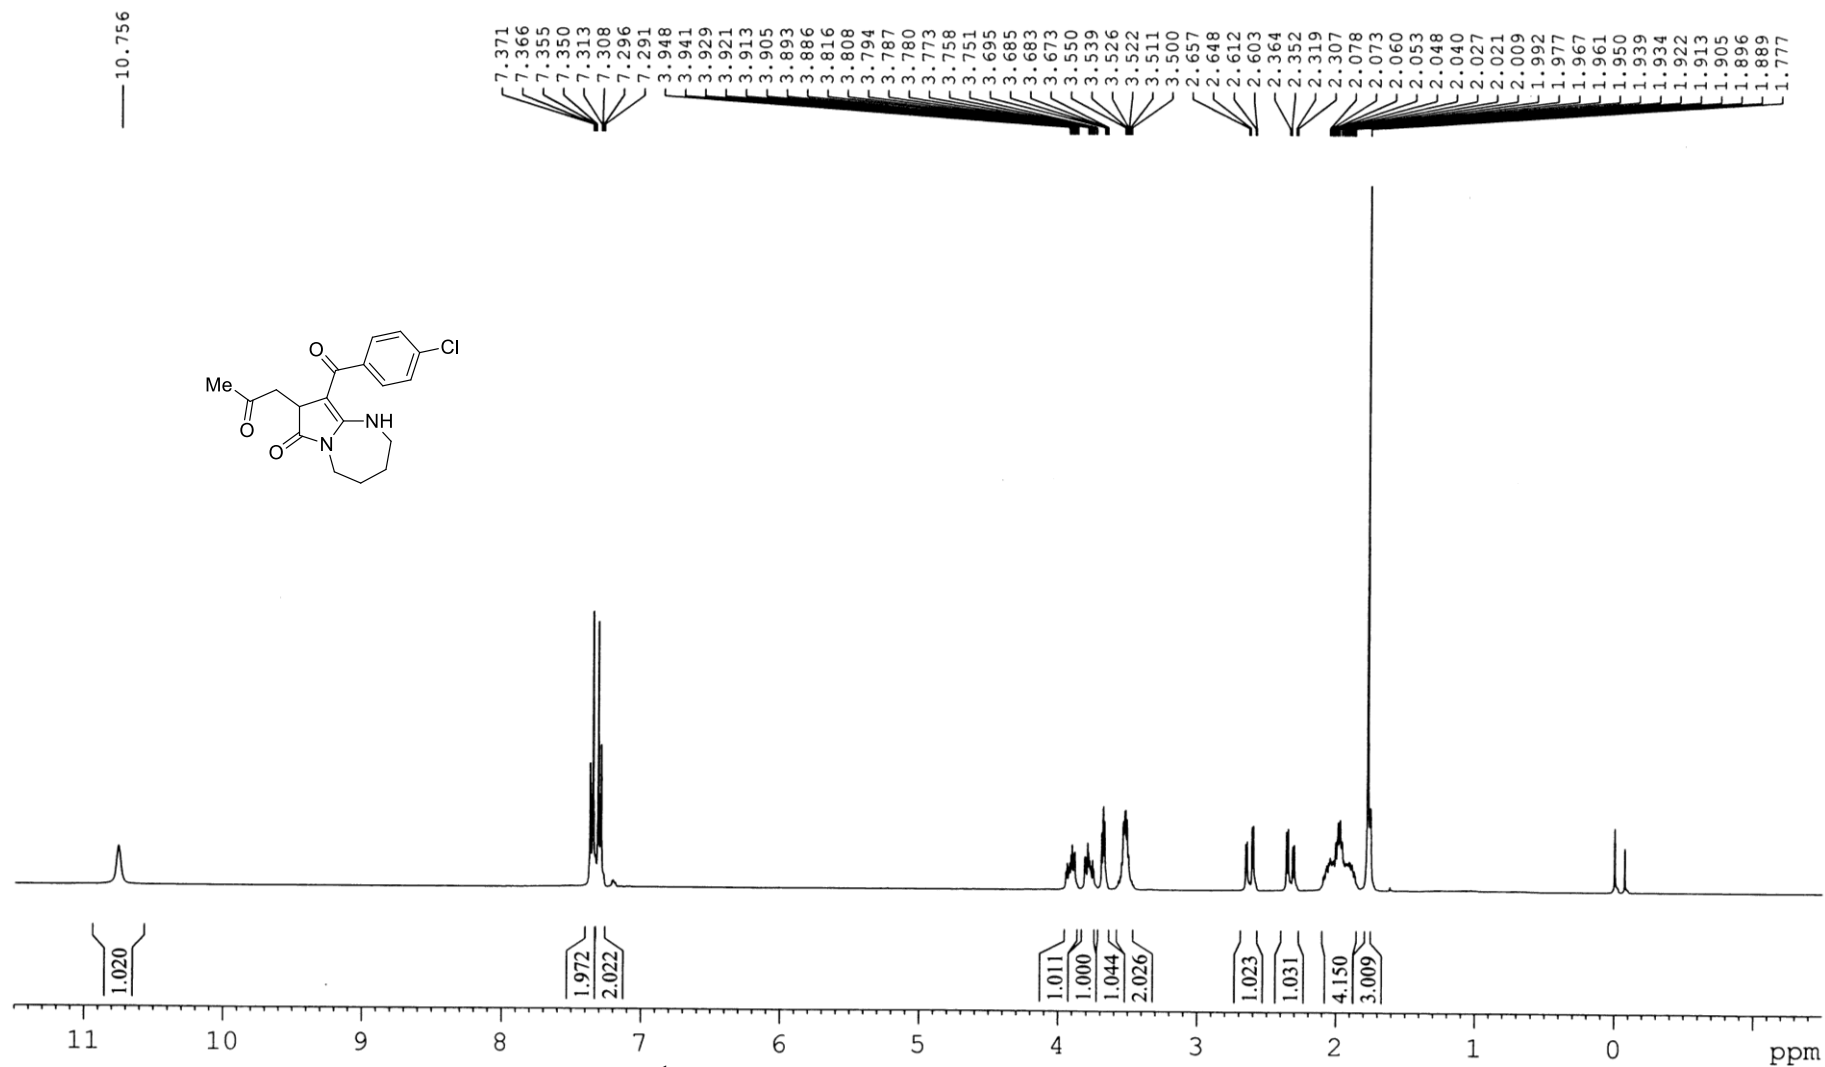

**Figure 33.**  $^1\text{H}$  NMR (400 MHz,  $\text{CDCl}_3$ ) spectra of compound **6g**

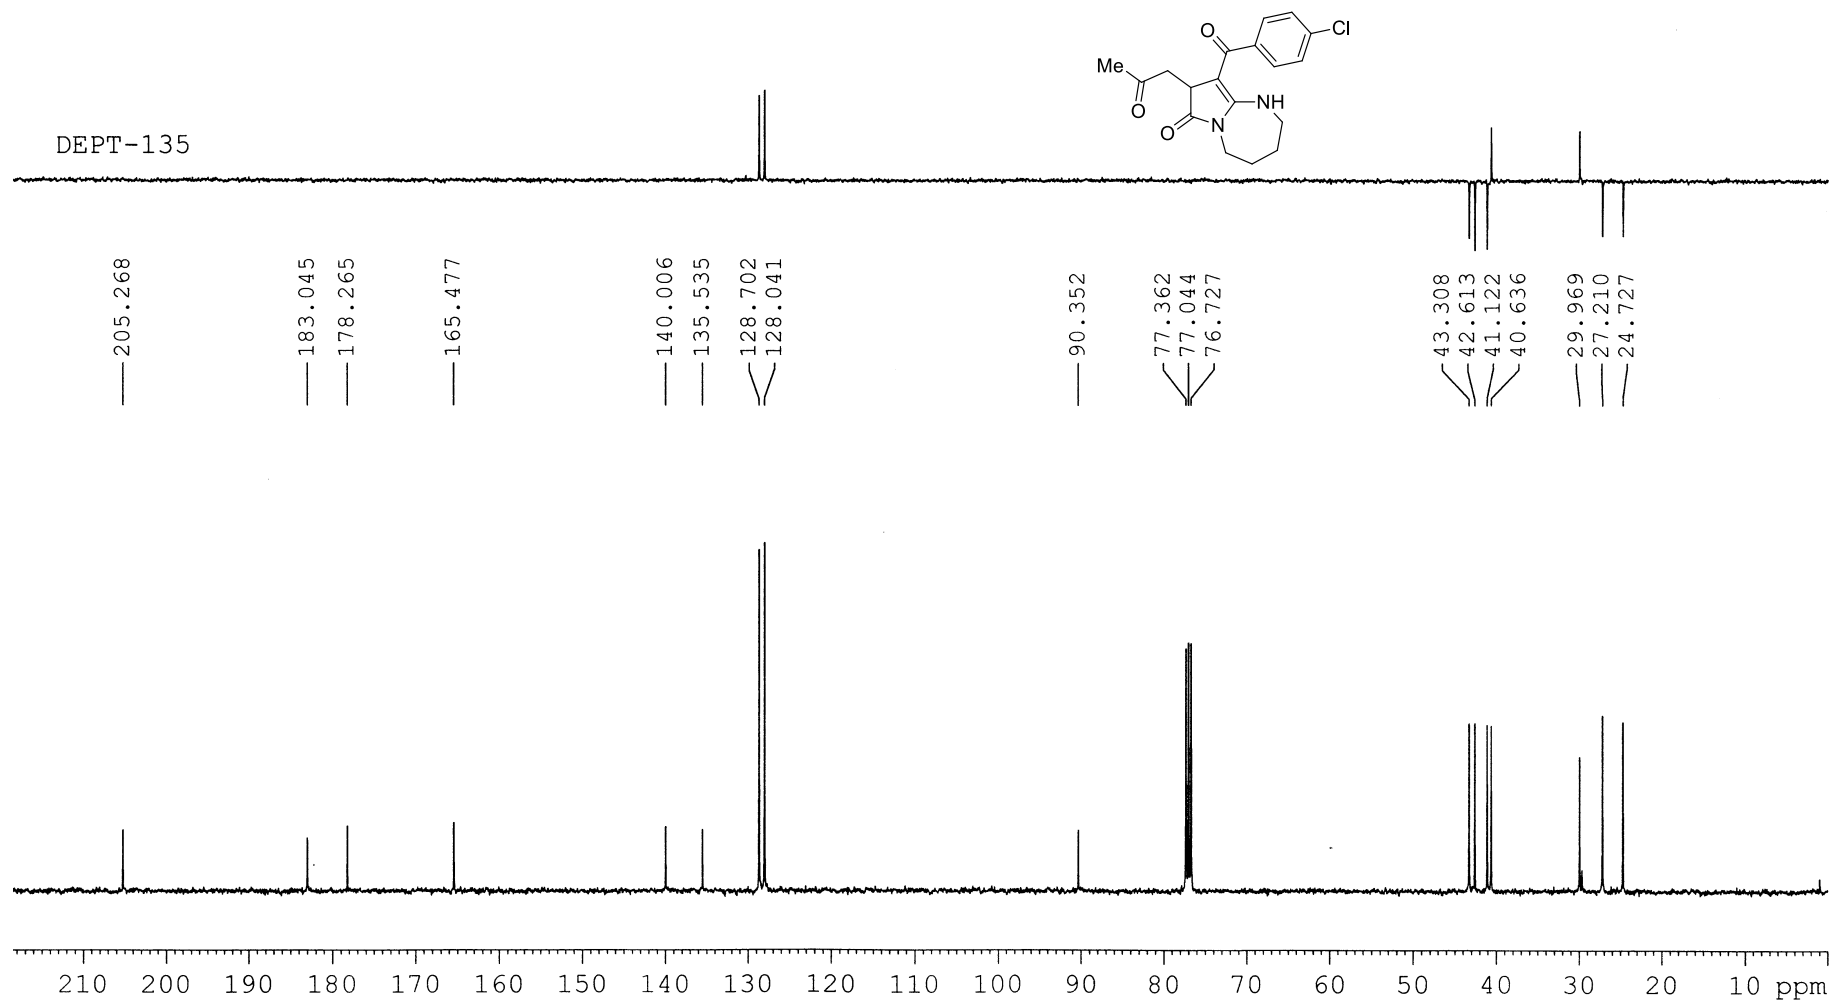

Figure 34.  $^{13}\text{C}$  NMR (100 MHz,  $\text{CDCl}_3$ ) spectra of compound **6g**

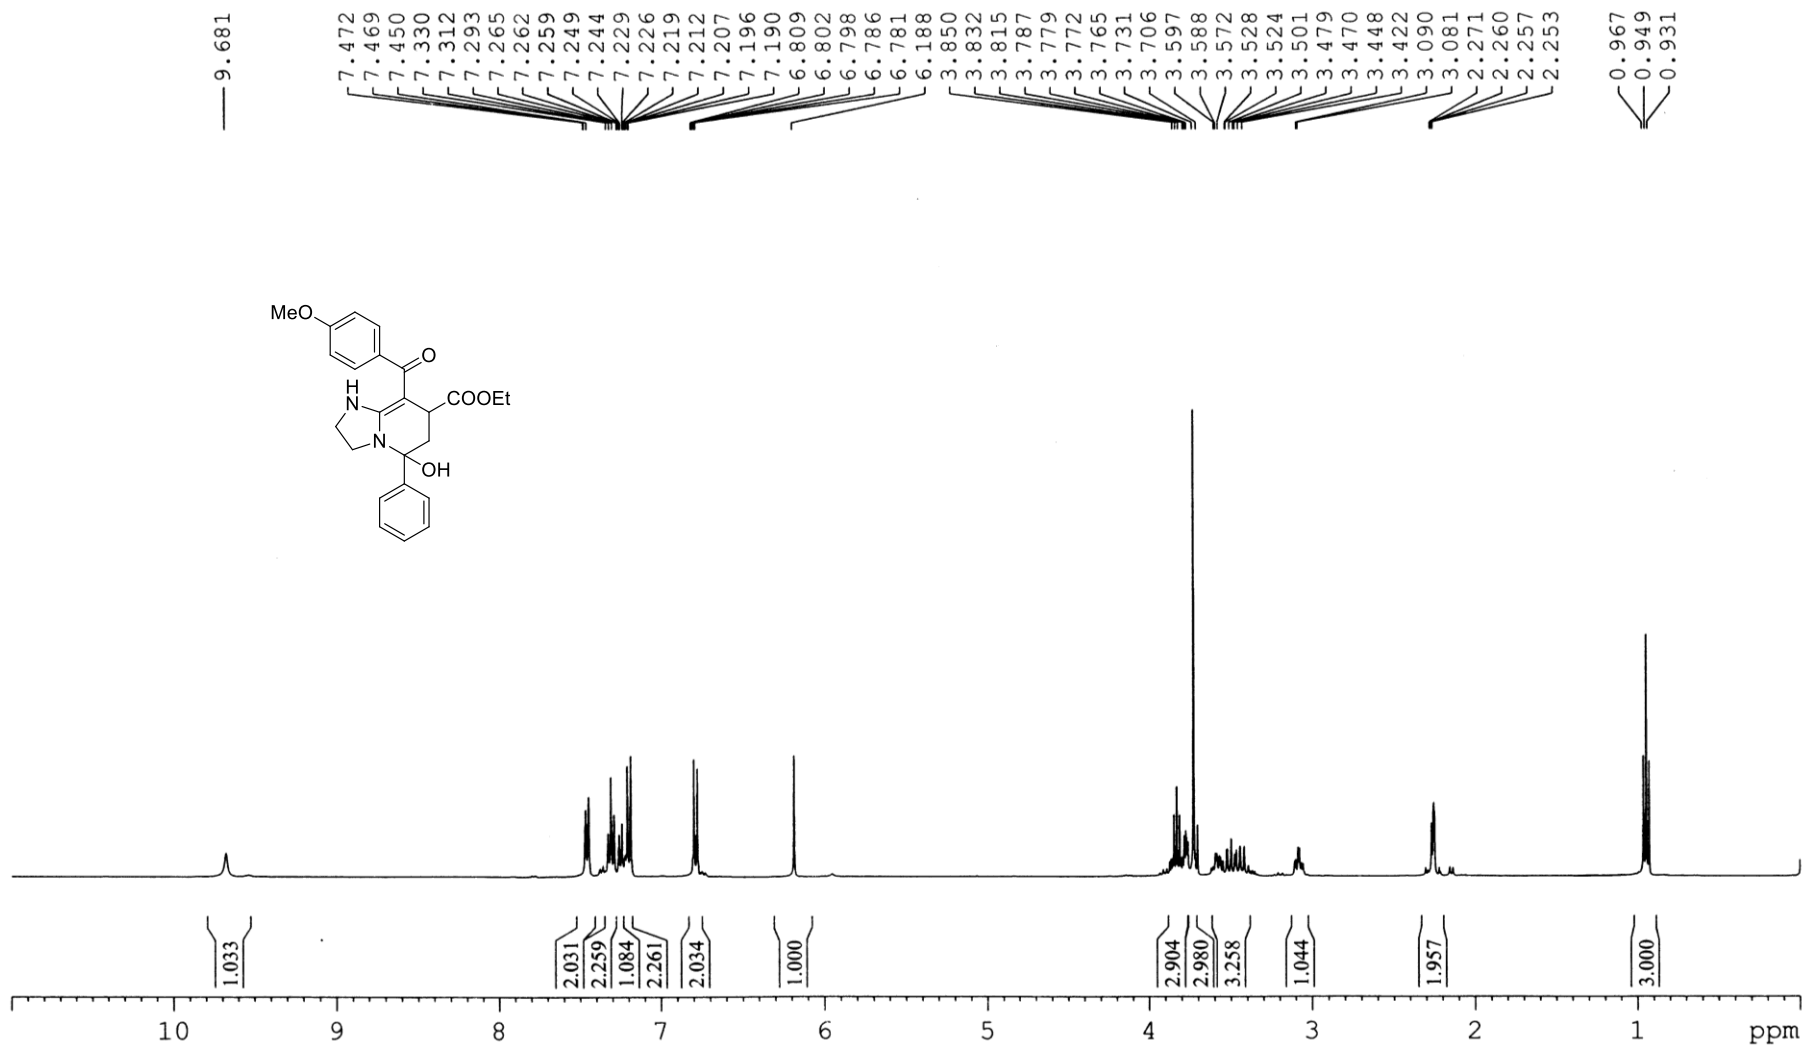

Figure 35. <sup>1</sup>H NMR (400 MHz, CDCl<sub>3</sub>) spectra of compound 7a

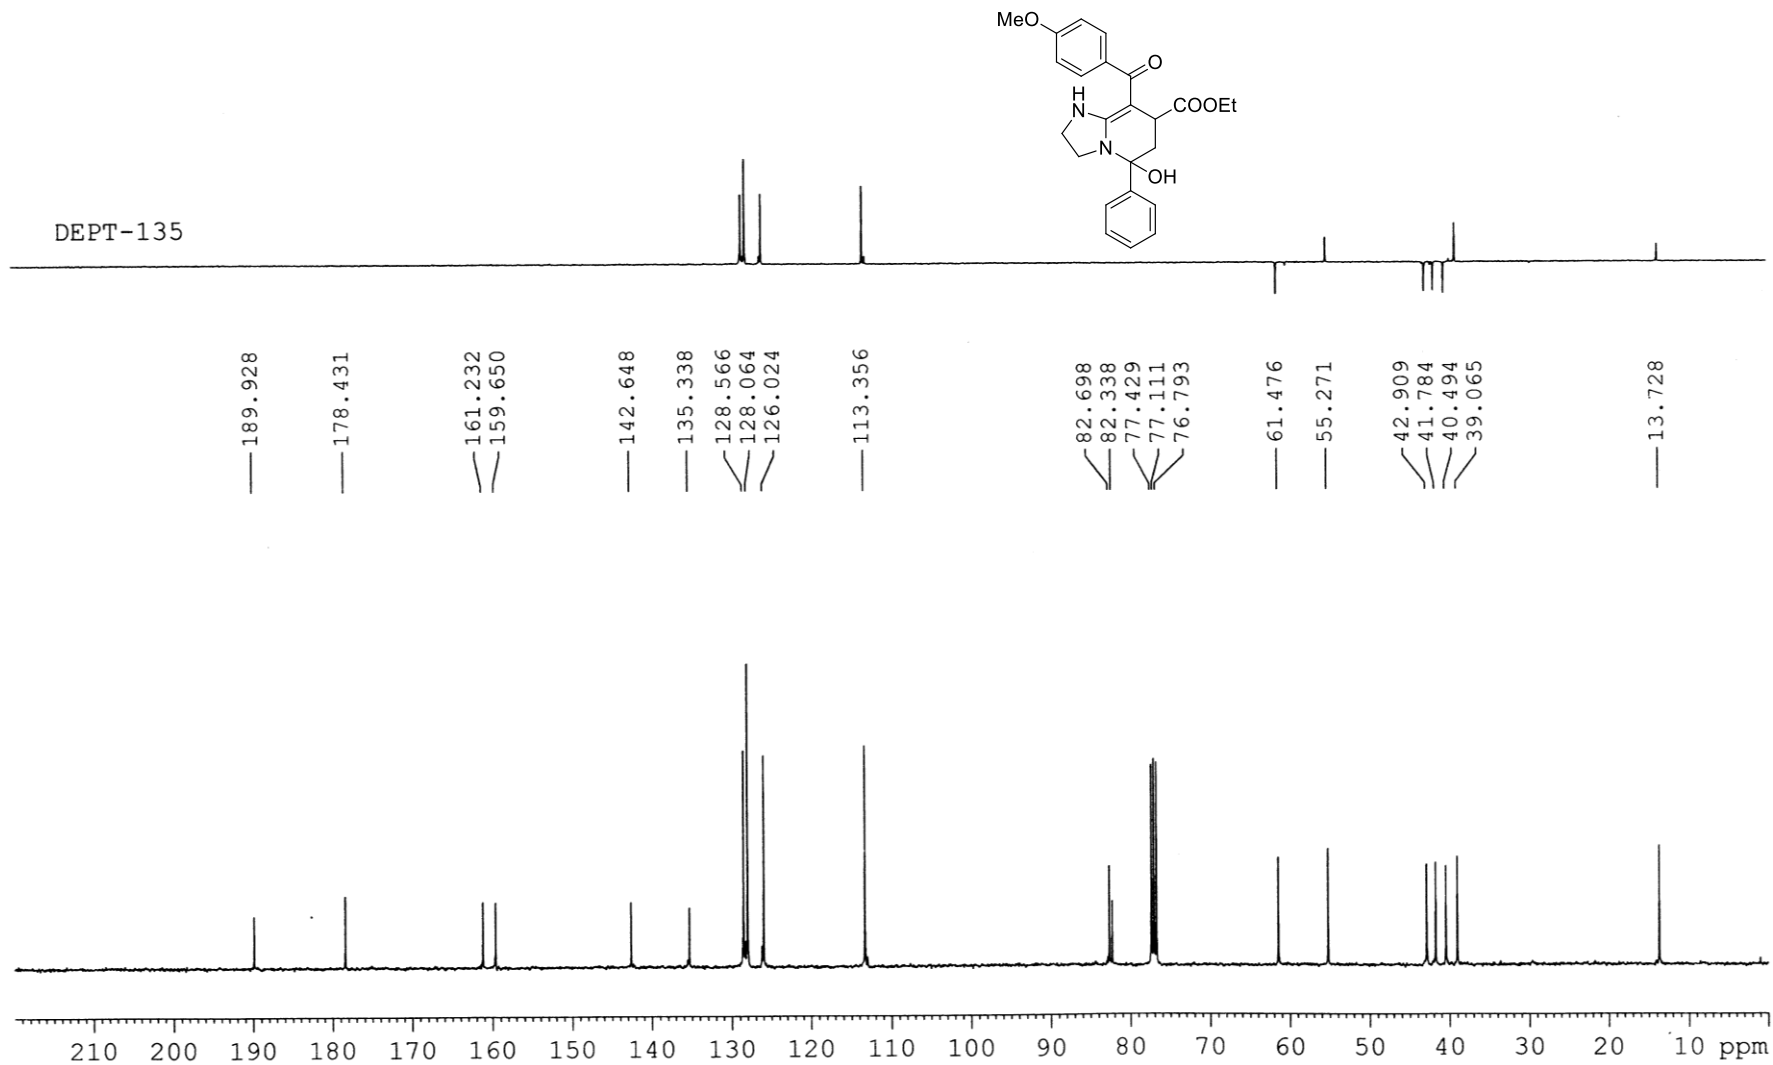

**Figure 36.**  $^{13}\text{C}$  NMR (100 MHz,  $\text{CDCl}_3$ ) spectra of compound **7a**

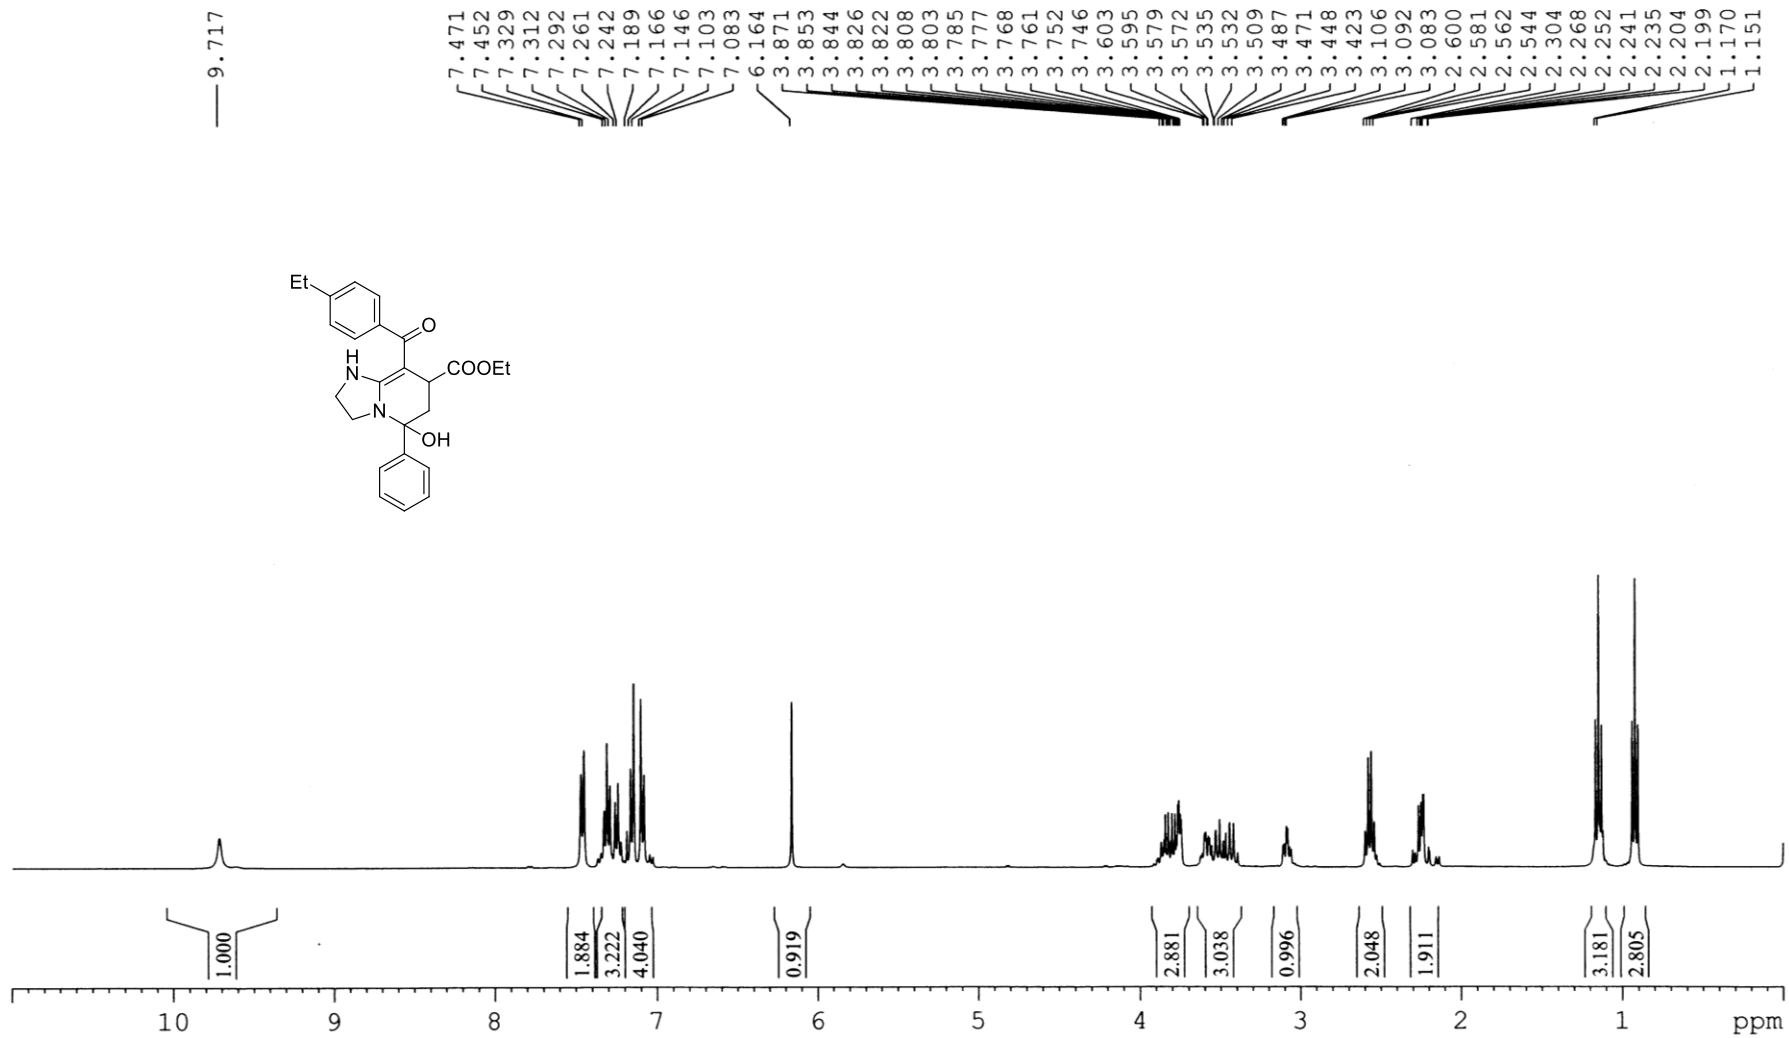

**Figure 37.**  $^1\text{H}$  NMR (400 MHz,  $\text{CDCl}_3$ ) spectra of compound **7b**

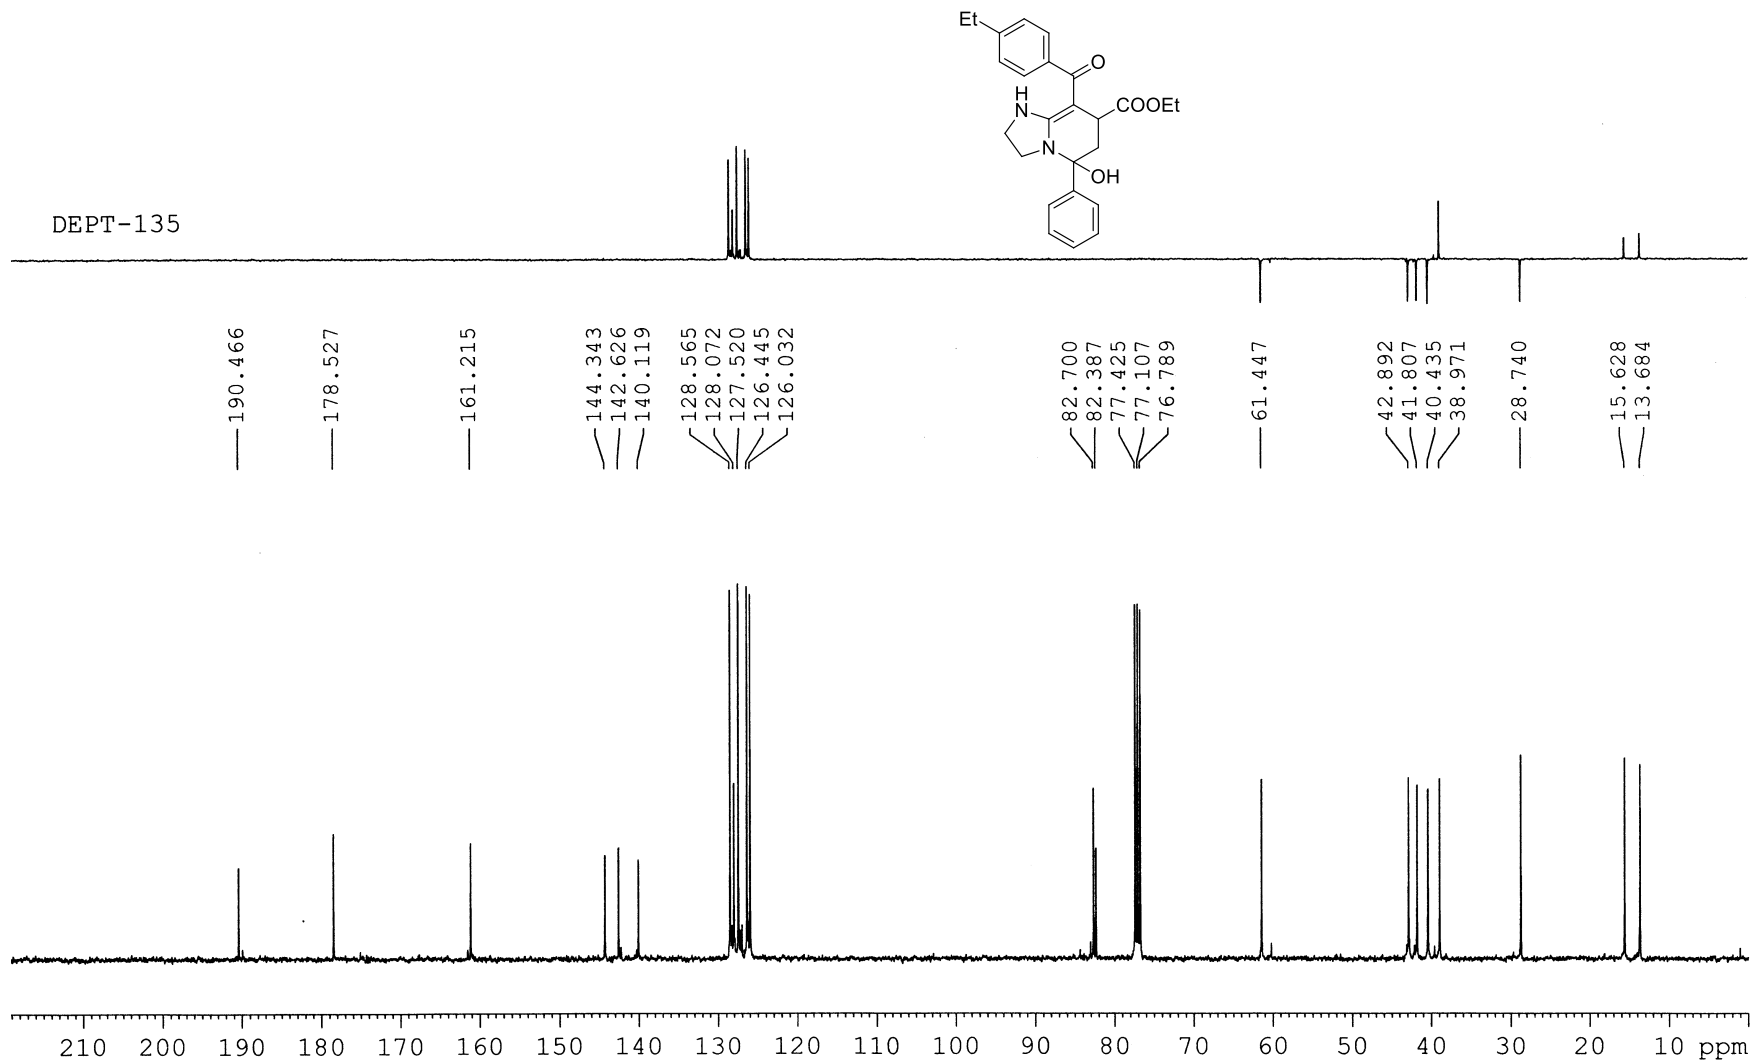

**Figure 38.**  $^{13}\text{C}$  NMR (100 MHz,  $\text{CDCl}_3$ ) spectra of compound **7b**

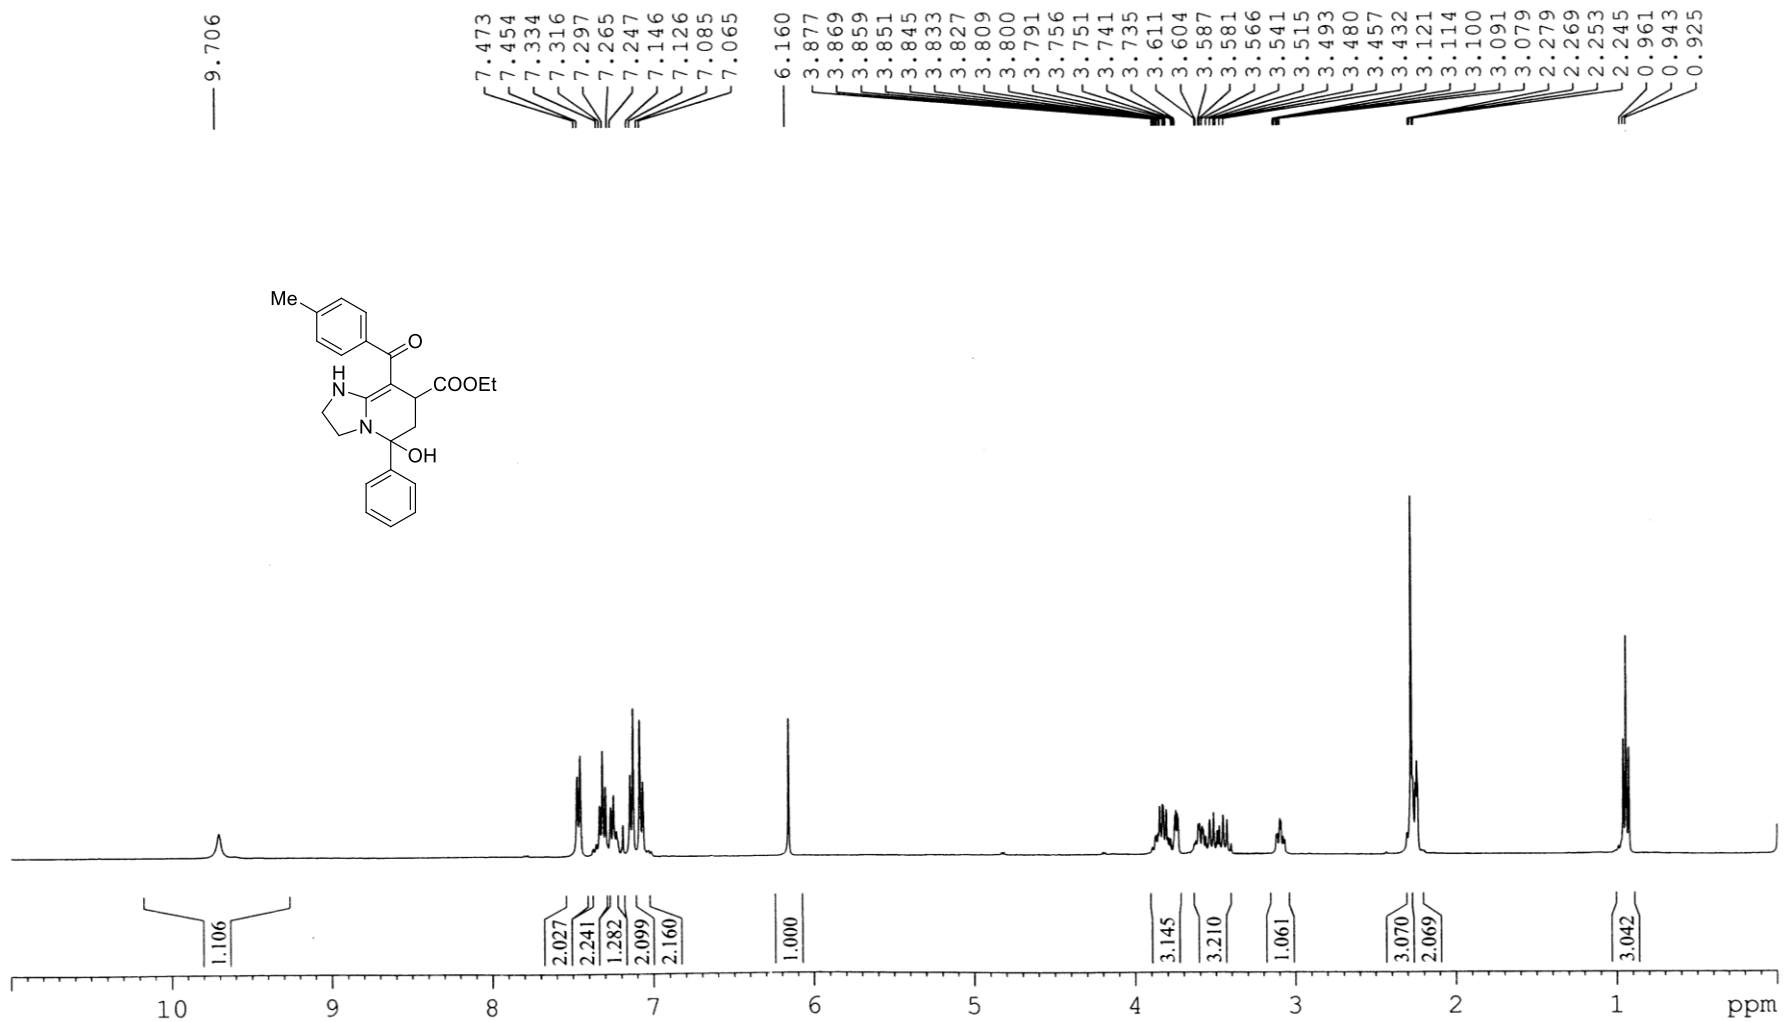

**Figure 39.** <sup>1</sup>H NMR (400 MHz, CDCl<sub>3</sub>) spectra of compound 7c

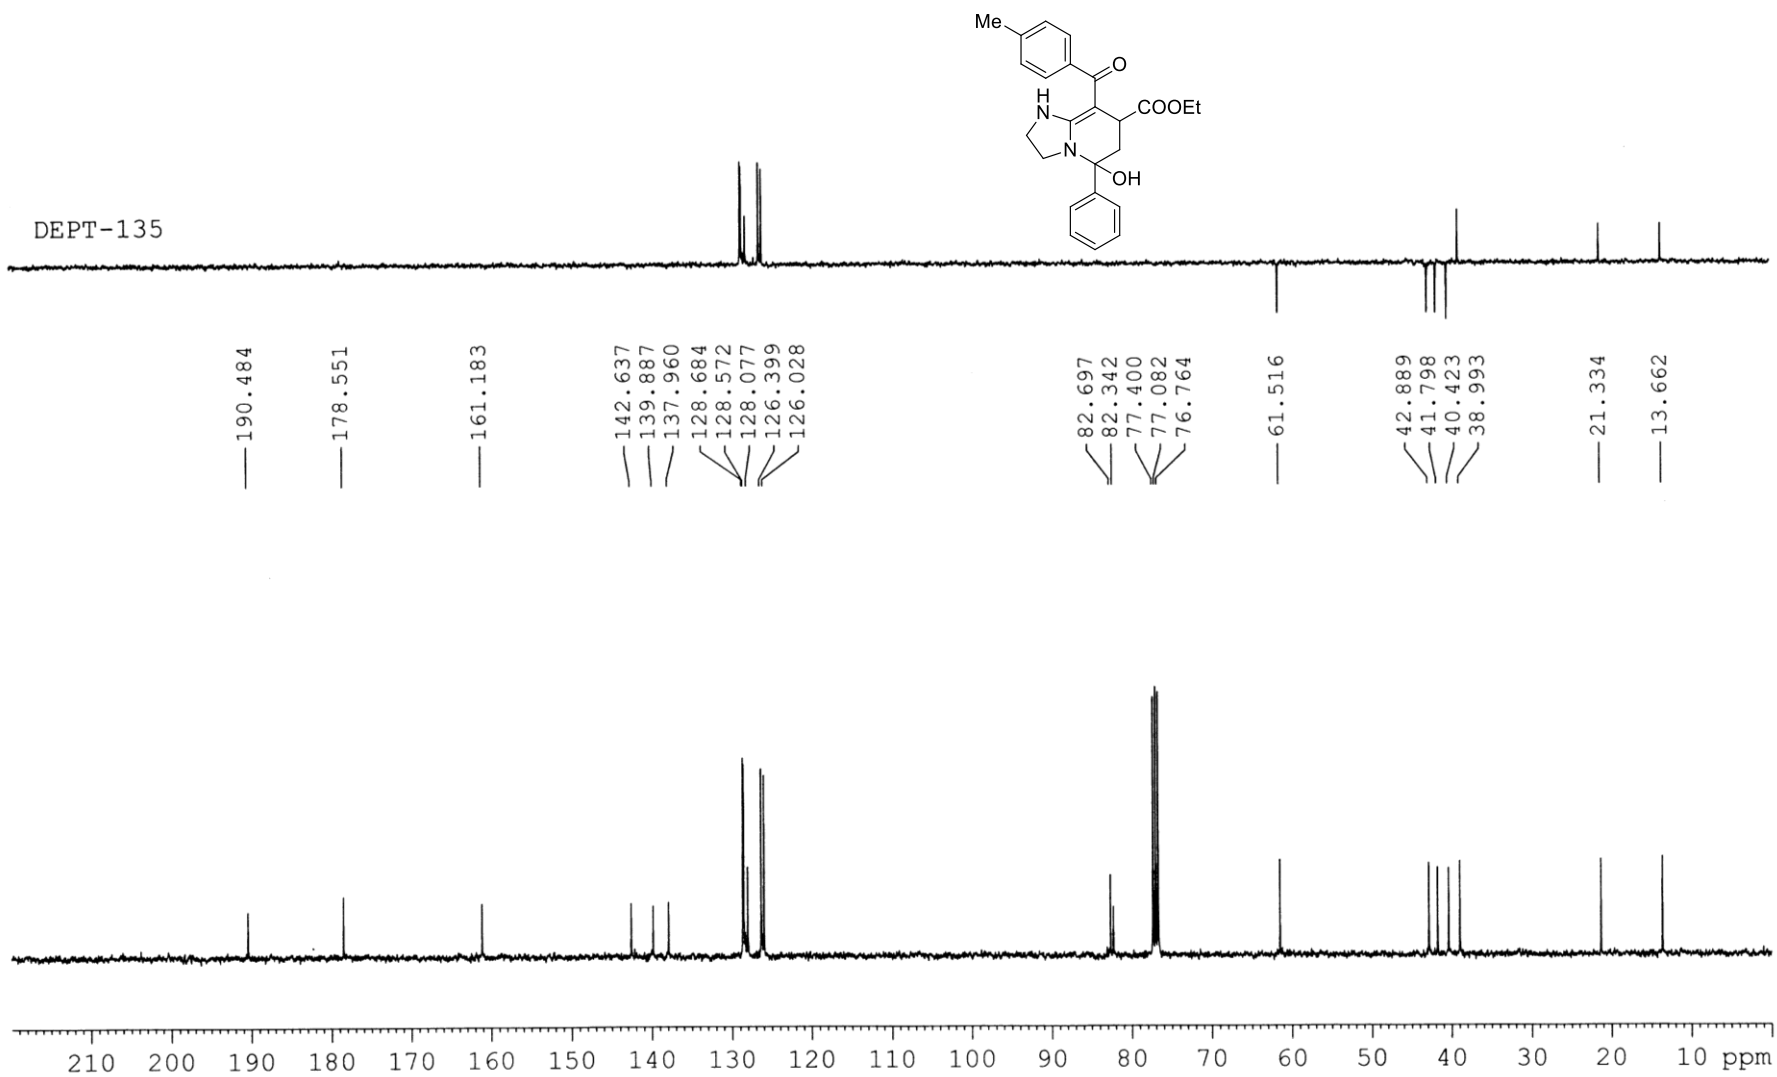

**Figure 40.**  $^{13}\text{C}$  NMR (100 MHz,  $\text{CDCl}_3$ ) spectra of compound **7c**



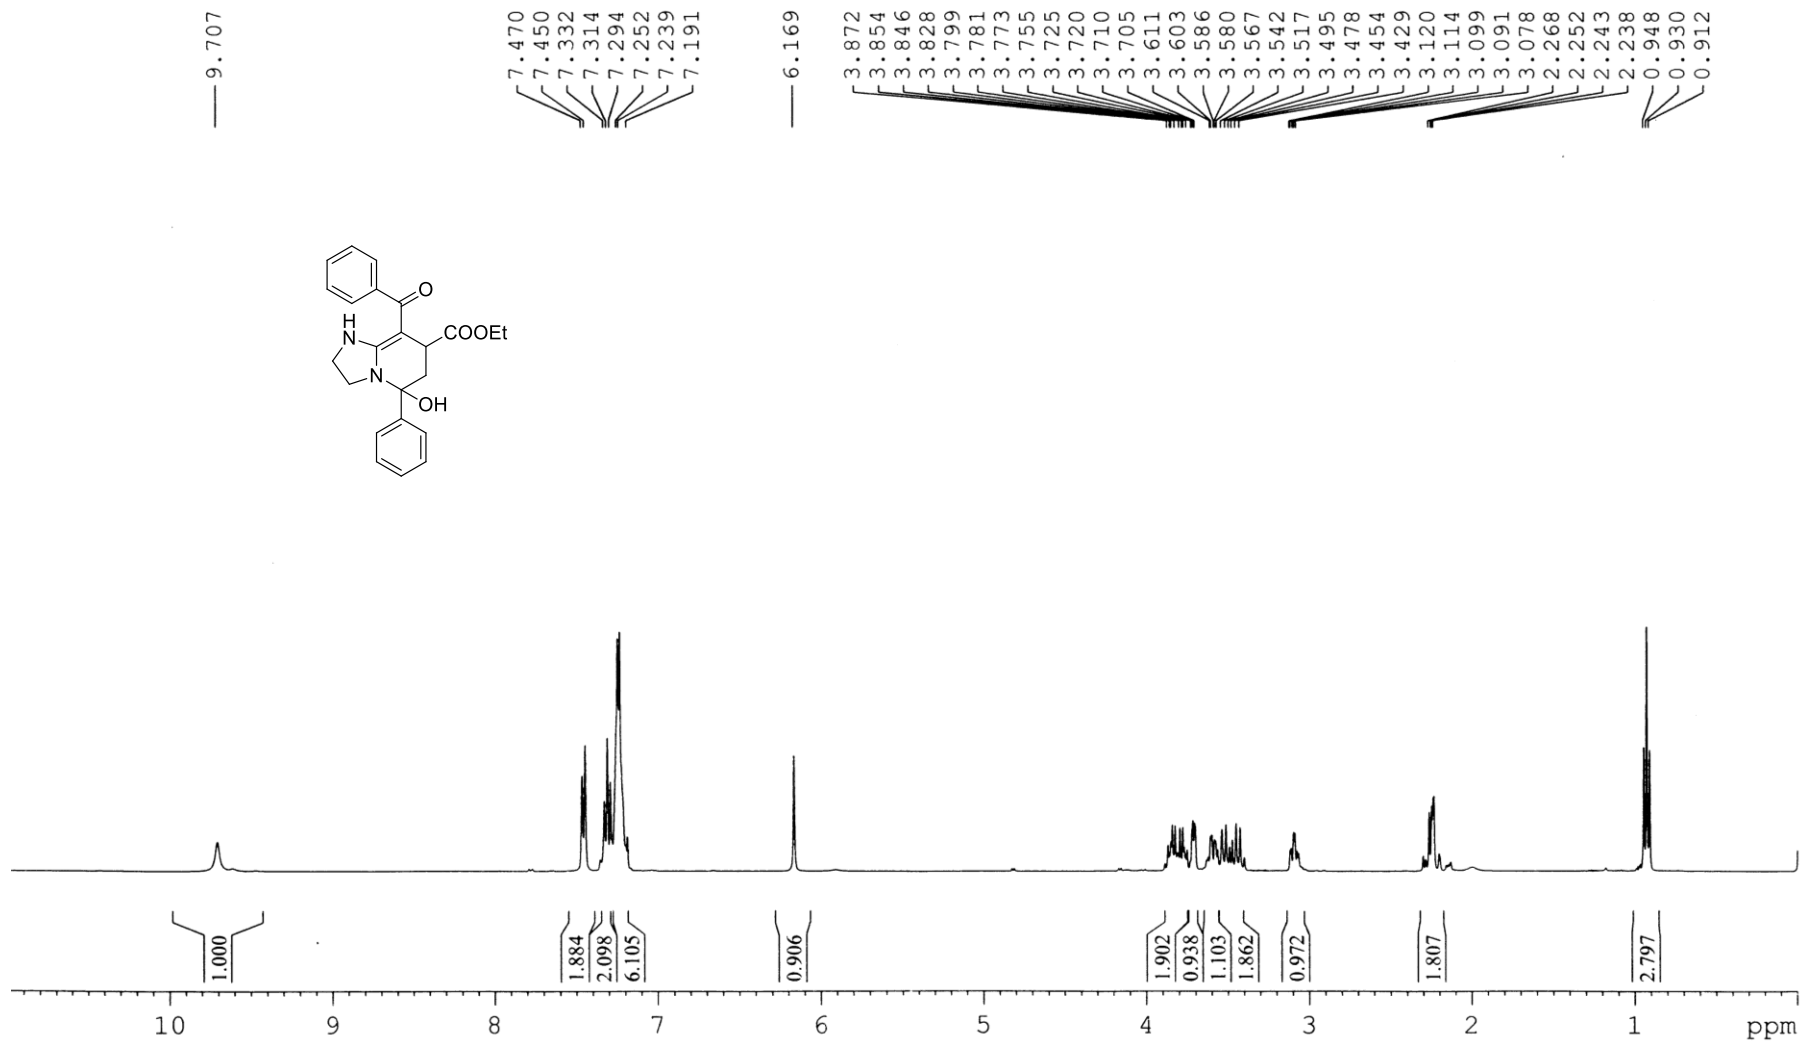

**Figure 41.** <sup>1</sup>H NMR (400 MHz, CDCl<sub>3</sub>) spectra of compound 7d

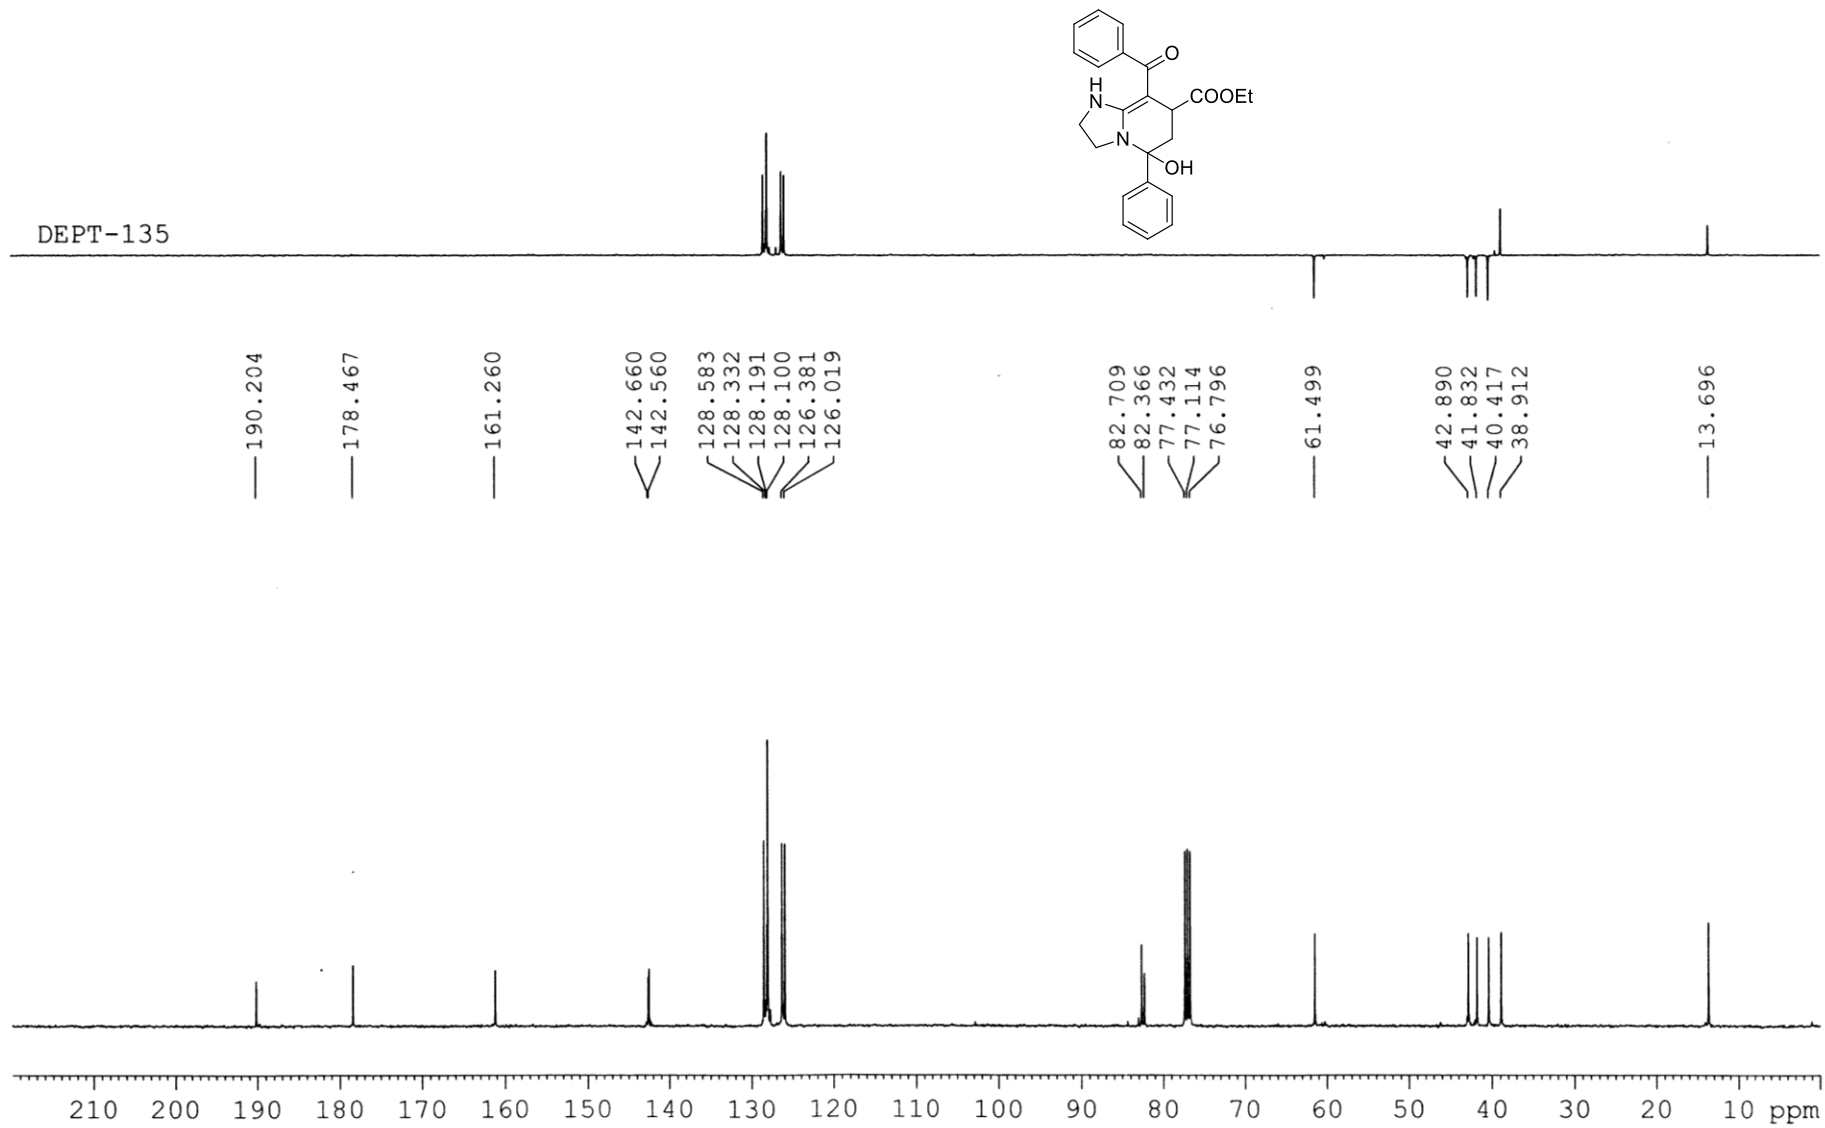

**Figure 42.**  $^{13}\text{C}$  NMR (100 MHz,  $\text{CDCl}_3$ ) spectra of compound **7d**

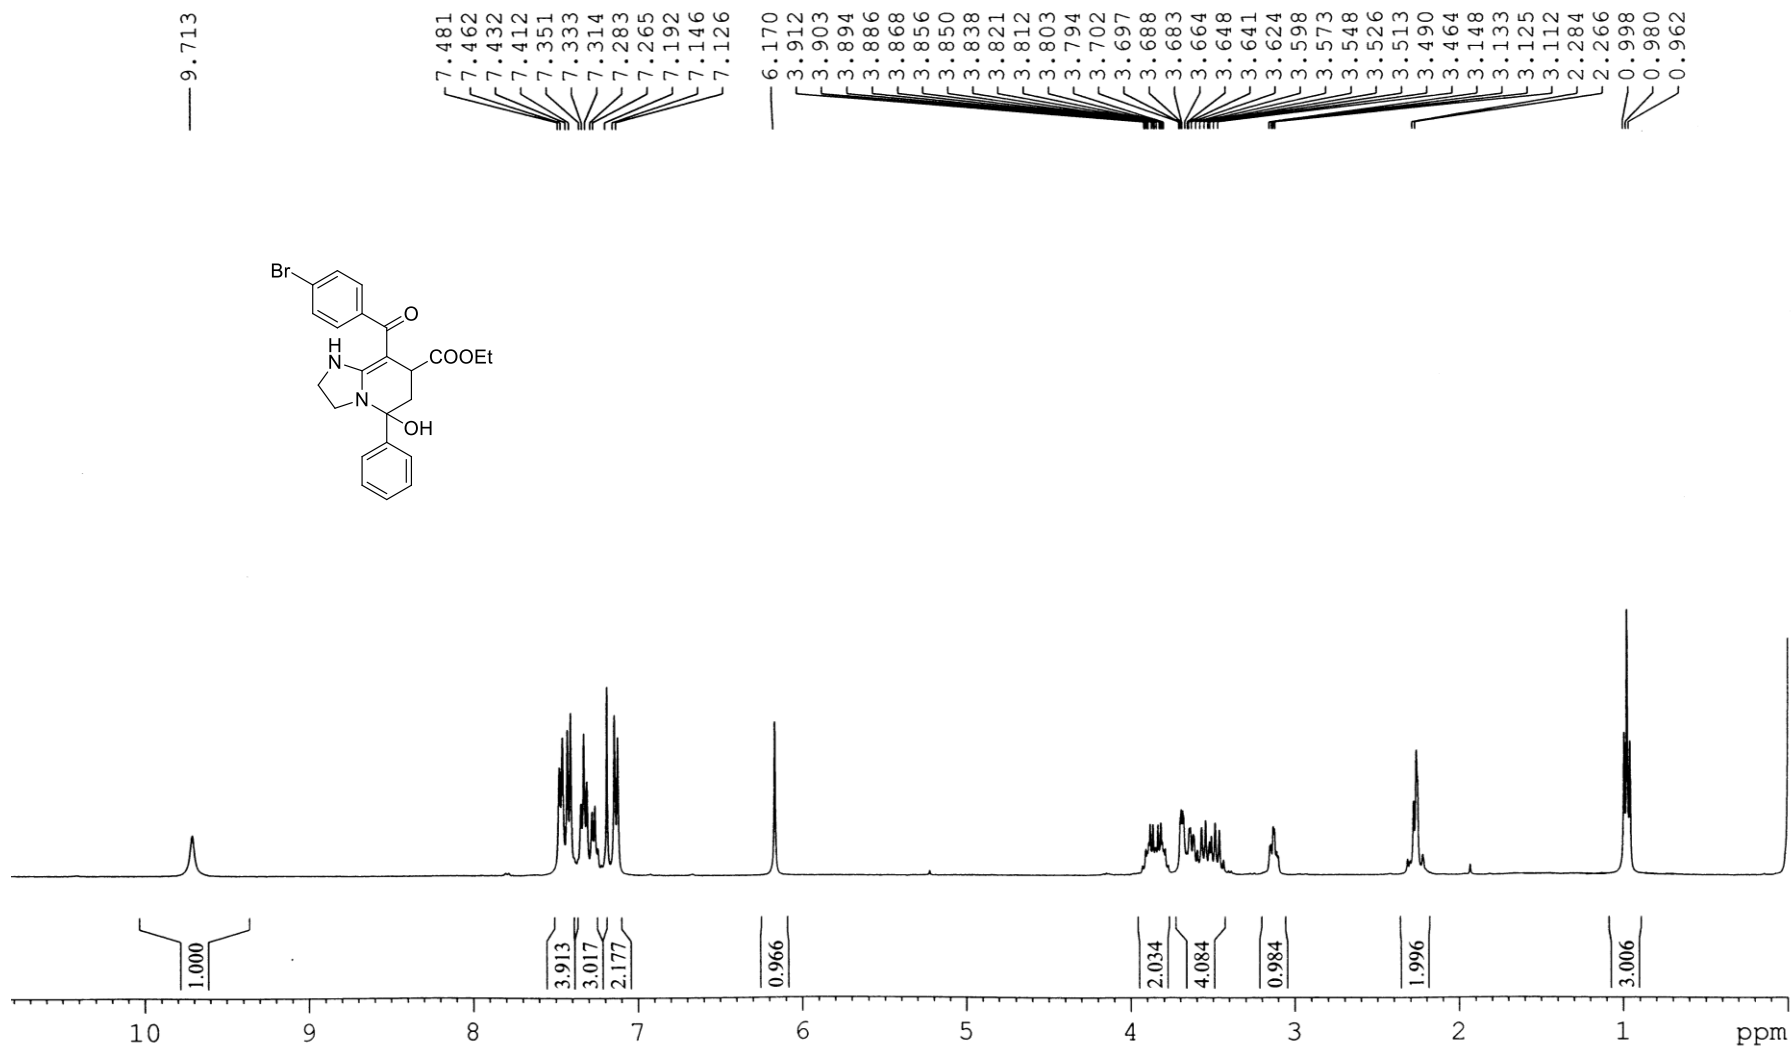

**Figure 43.**  $^1\text{H NMR}$  (400 MHz,  $\text{CDCl}_3$ ) spectra of compound **7e**

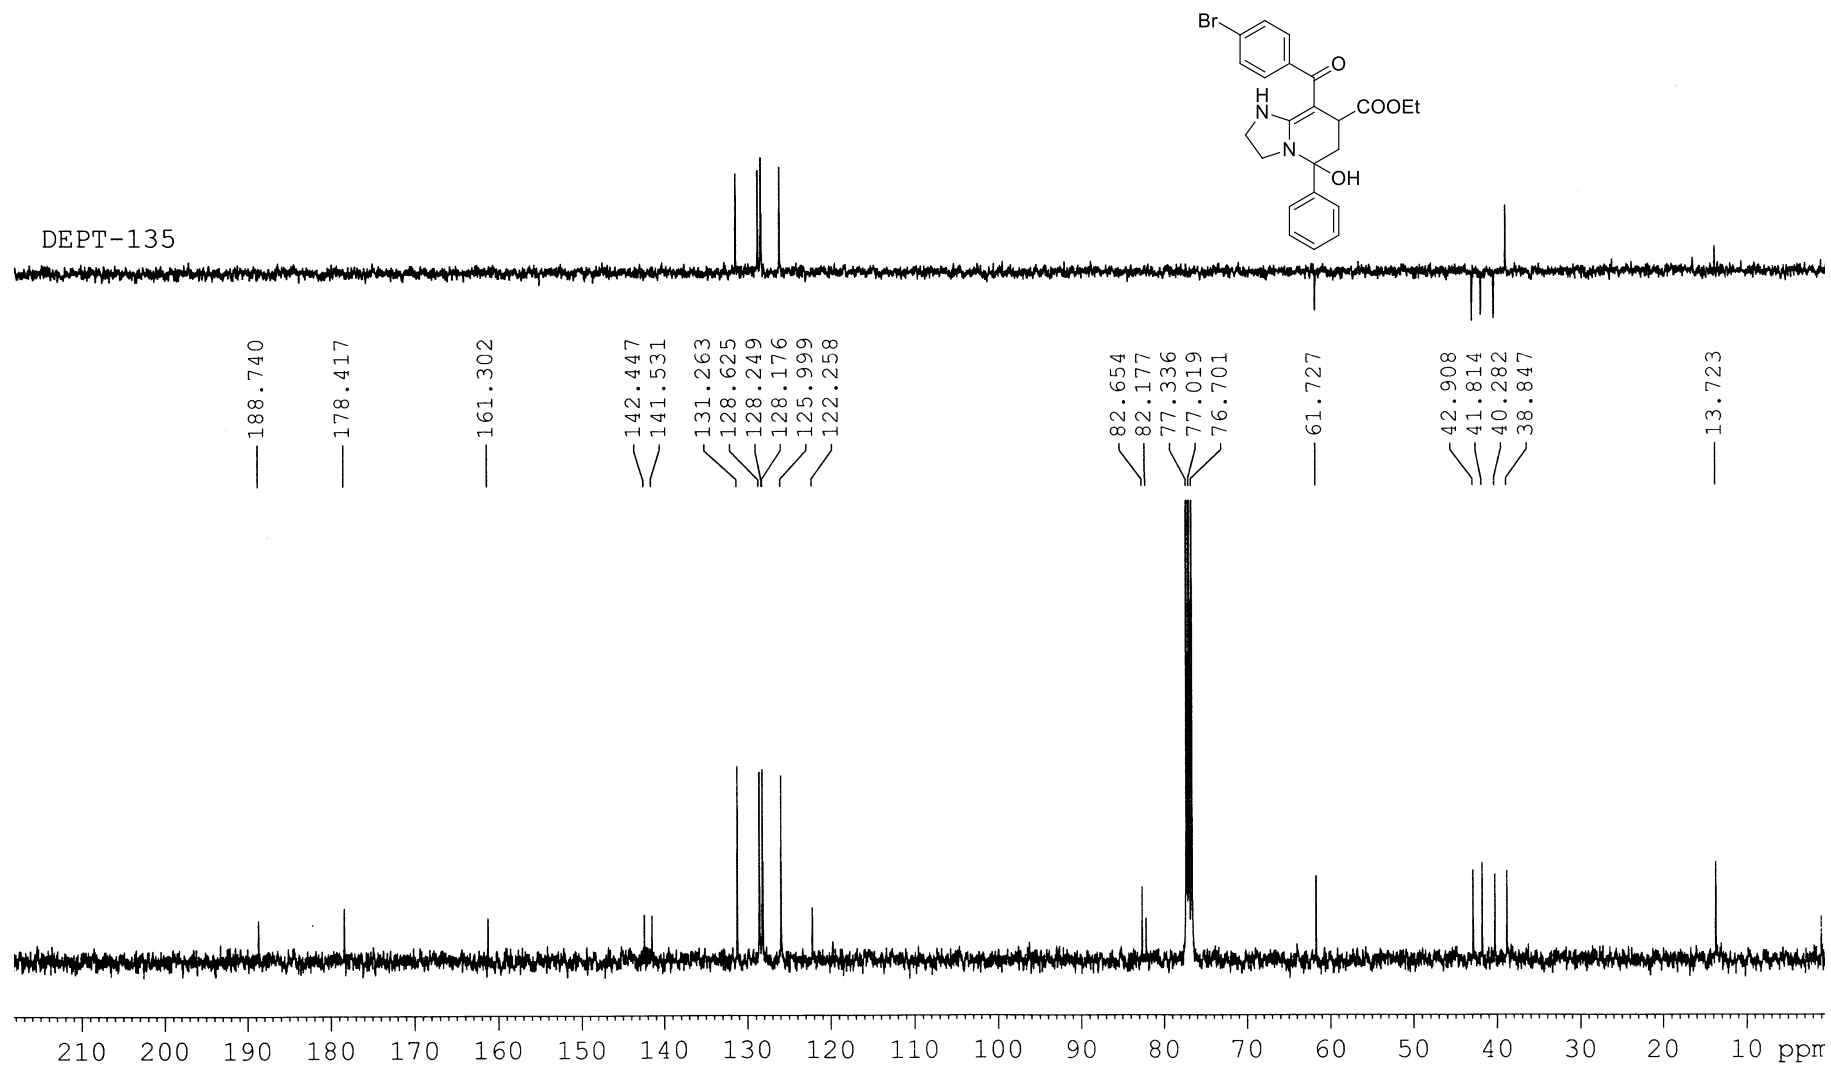

Figure 44.  $^{13}\text{C}$  NMR (100 MHz,  $\text{CDCl}_3$ ) spectra of compound **7e**

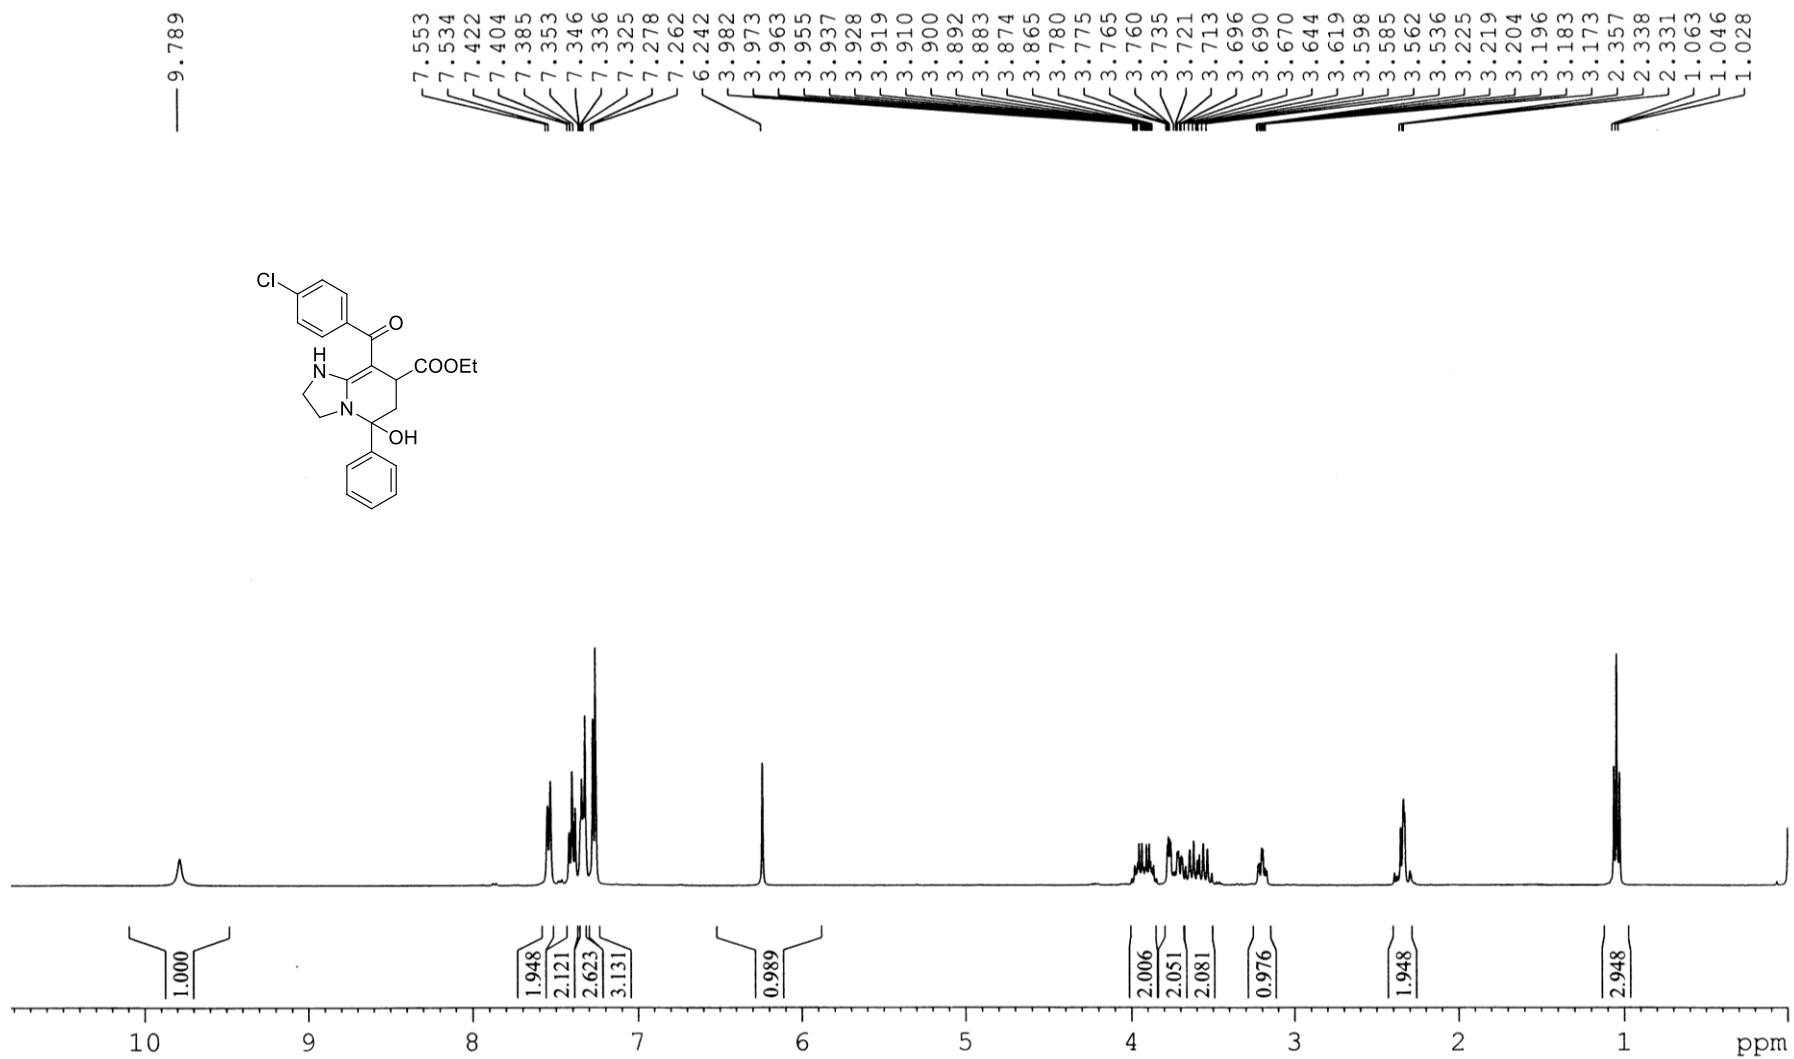

Figure 45.  $^1\text{H NMR}$  (400 MHz,  $\text{CDCl}_3$ ) spectra of compound 7f

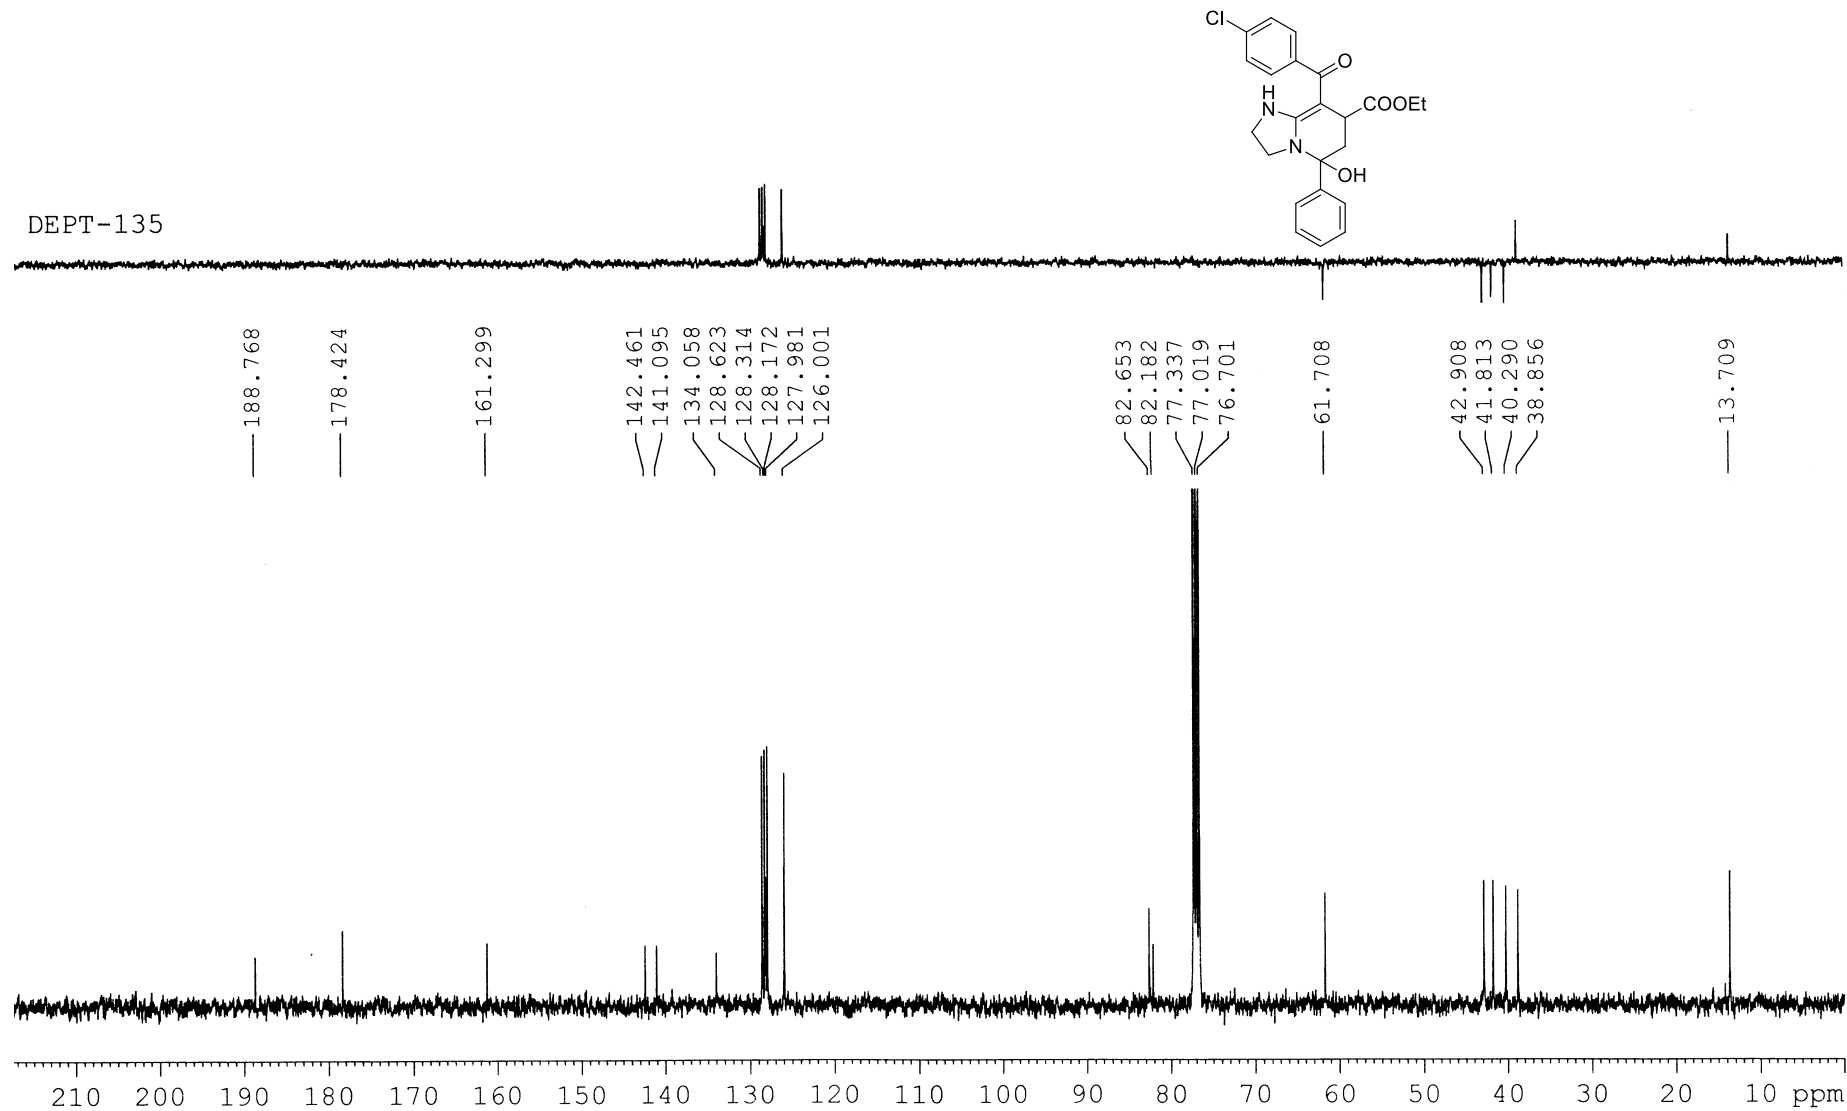

Figure 46.  $^{13}\text{C}$  NMR (100 MHz,  $\text{CDCl}_3$ ) spectra of compound **7f**

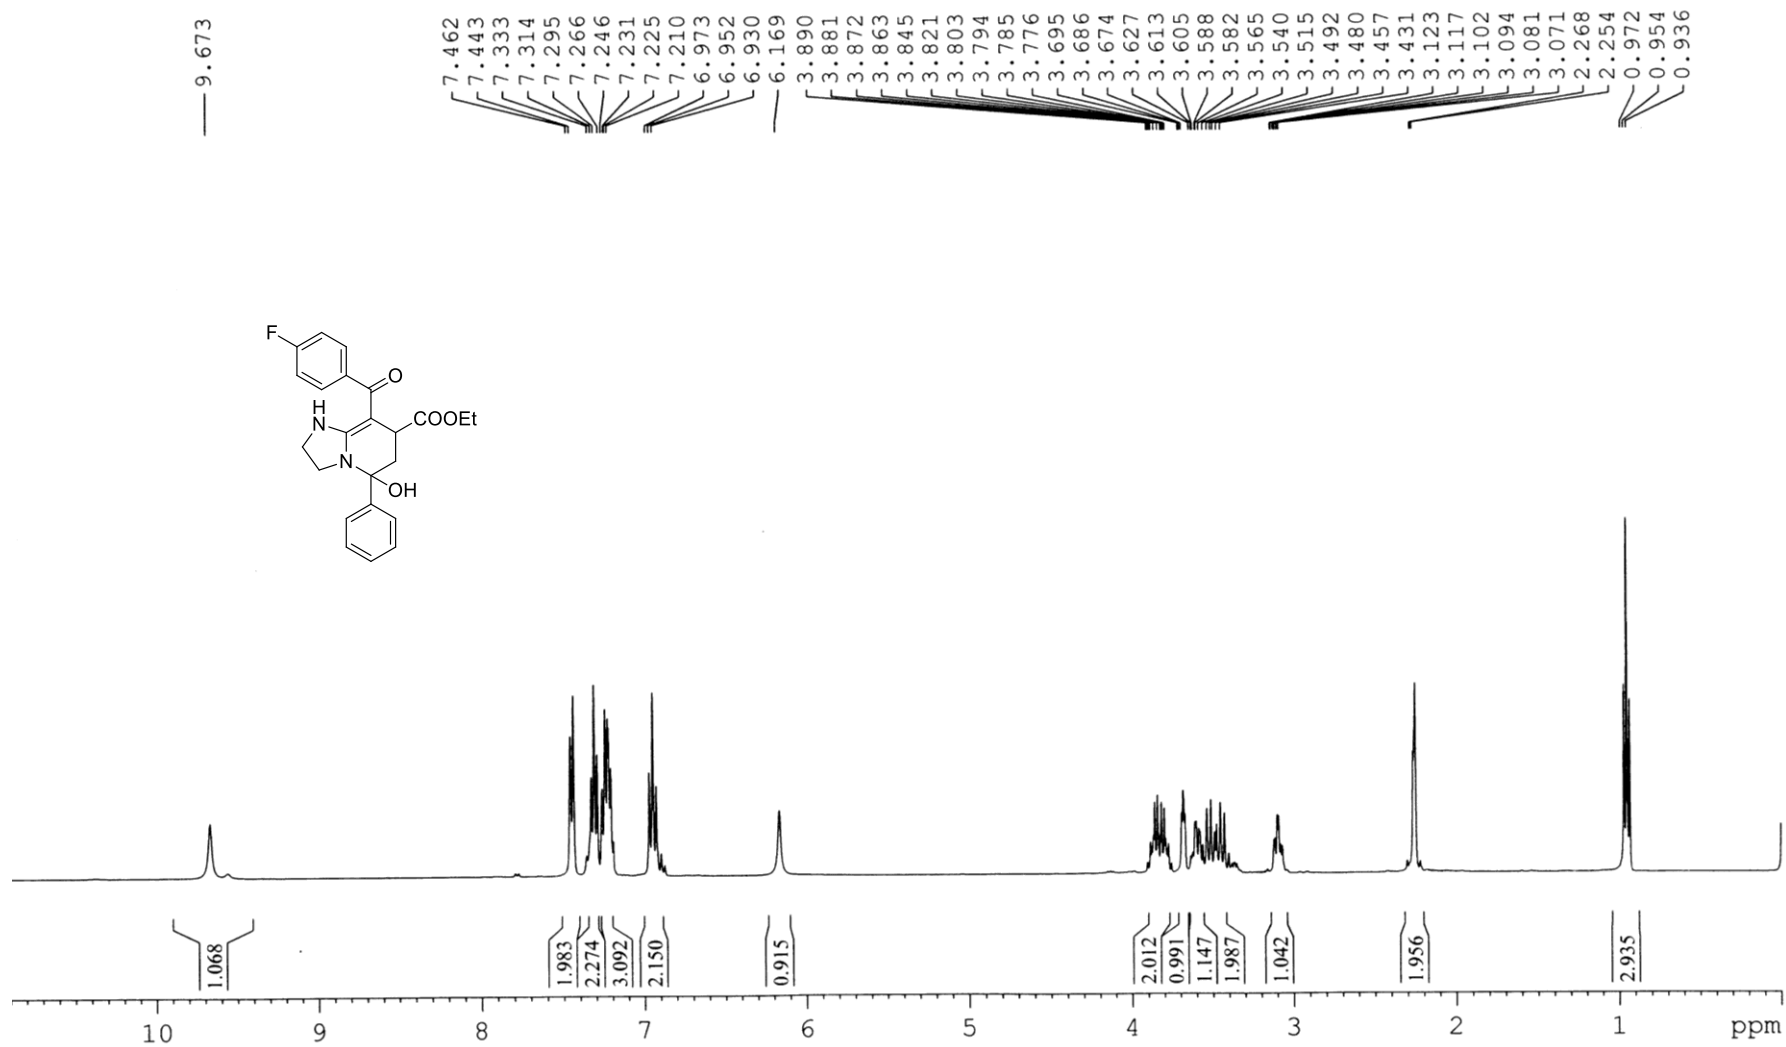

**Figure 47.**  $^1\text{H NMR}$  (400 MHz,  $\text{CDCl}_3$ ) spectra of compound **7g**

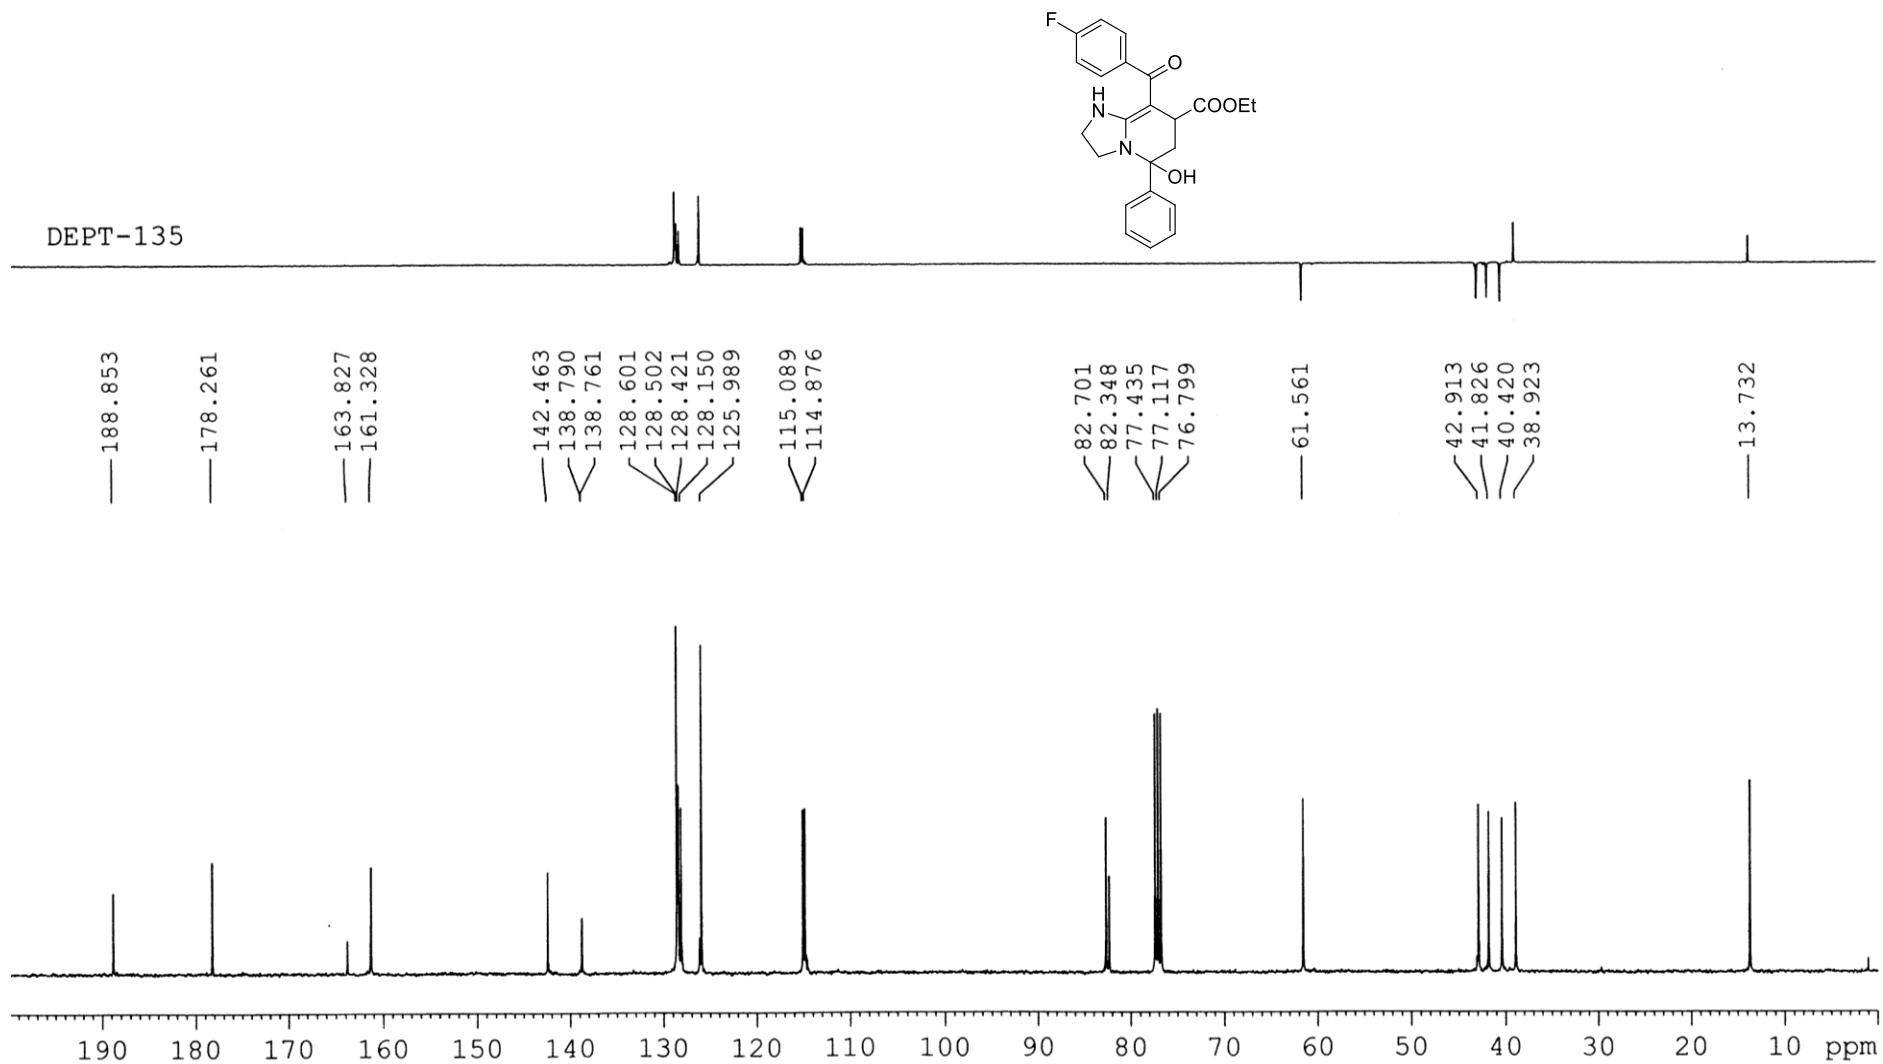



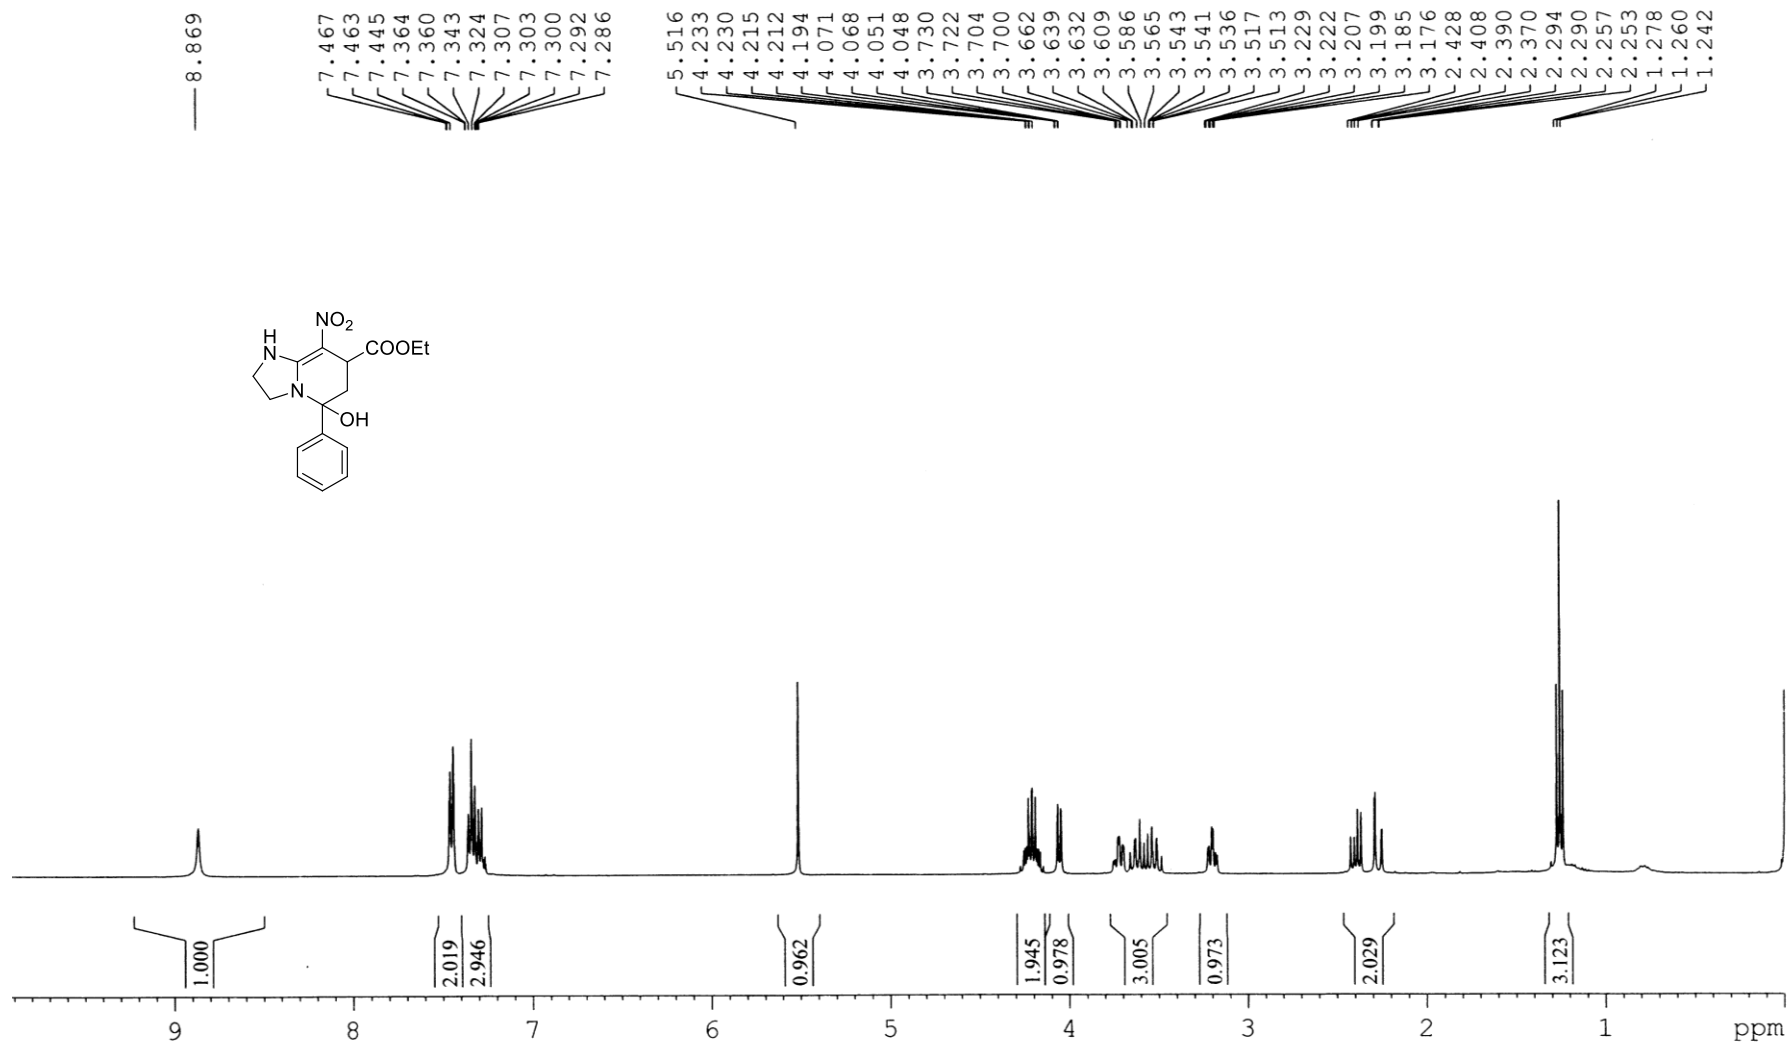

**Figure 49.** <sup>1</sup>H NMR (400 MHz, CDCl<sub>3</sub>) spectra of compound **7h**

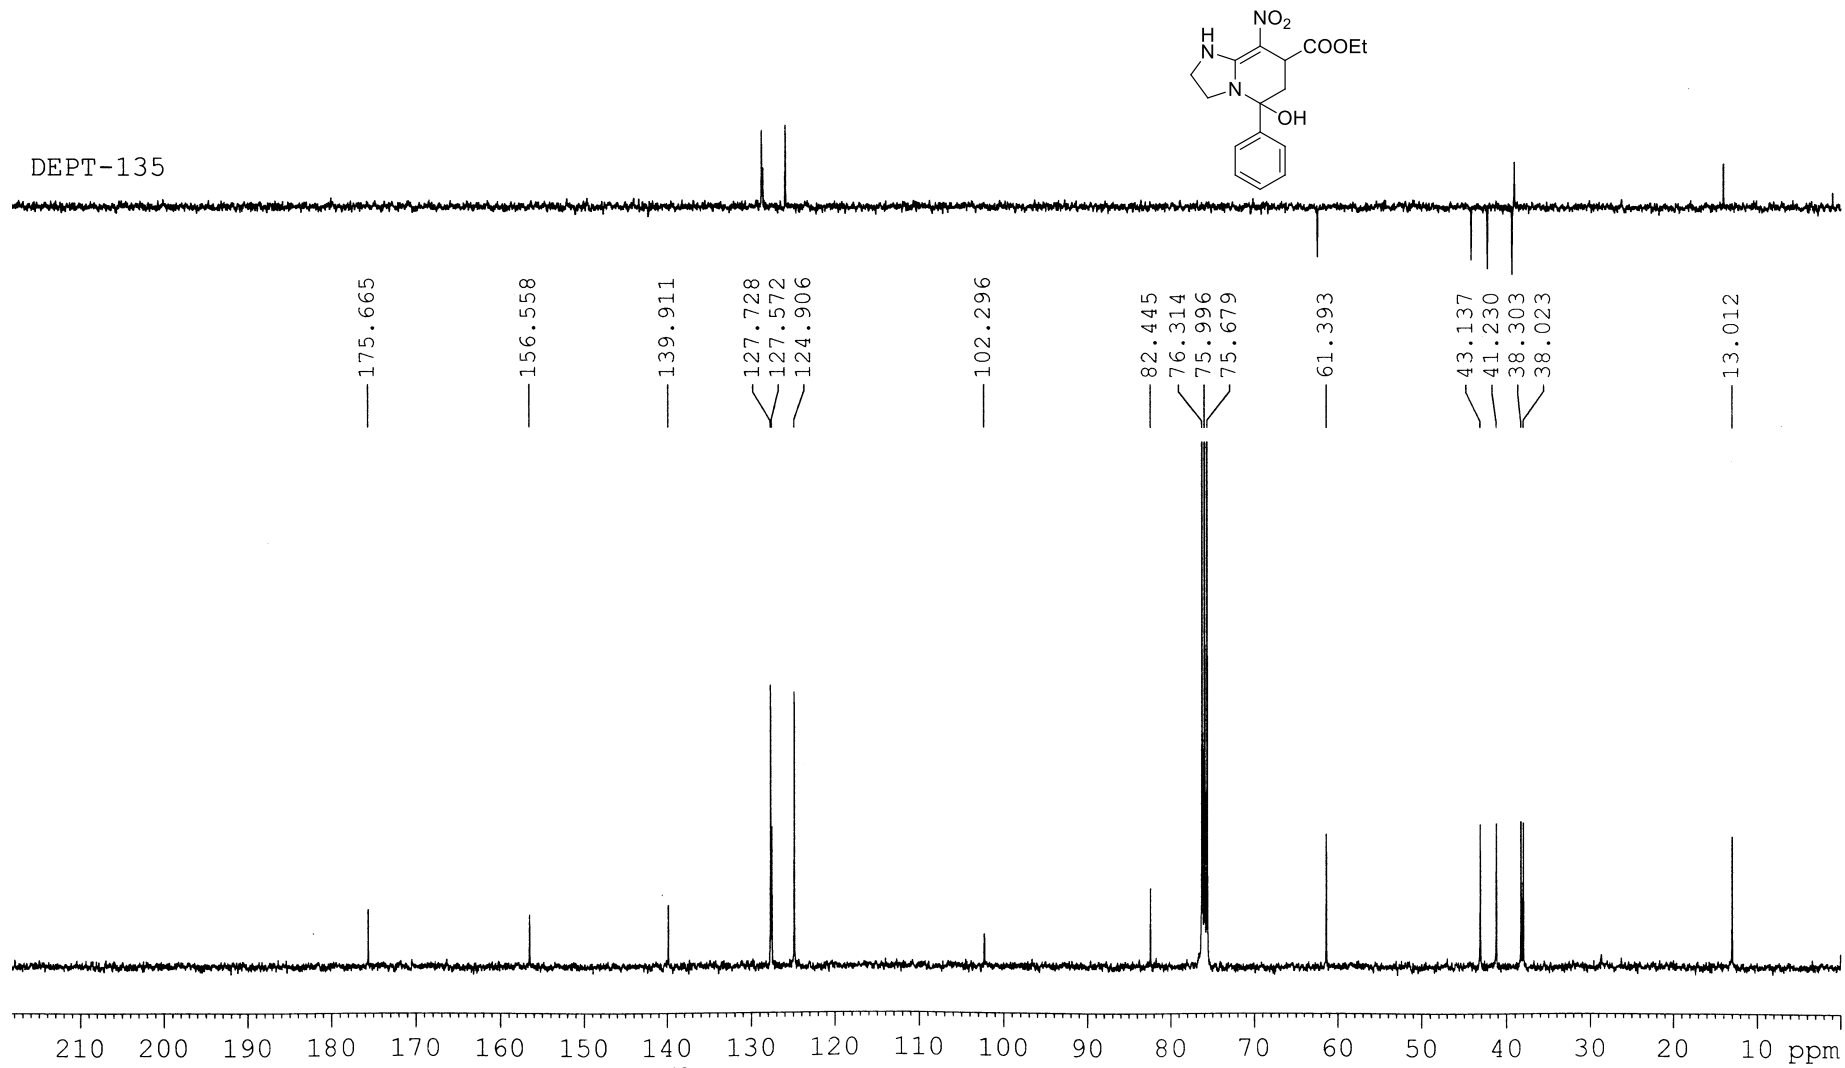

**Figure 50.**  $^{13}\text{C}$  NMR (100 MHz,  $\text{CDCl}_3$ ) spectra of compound **7h**

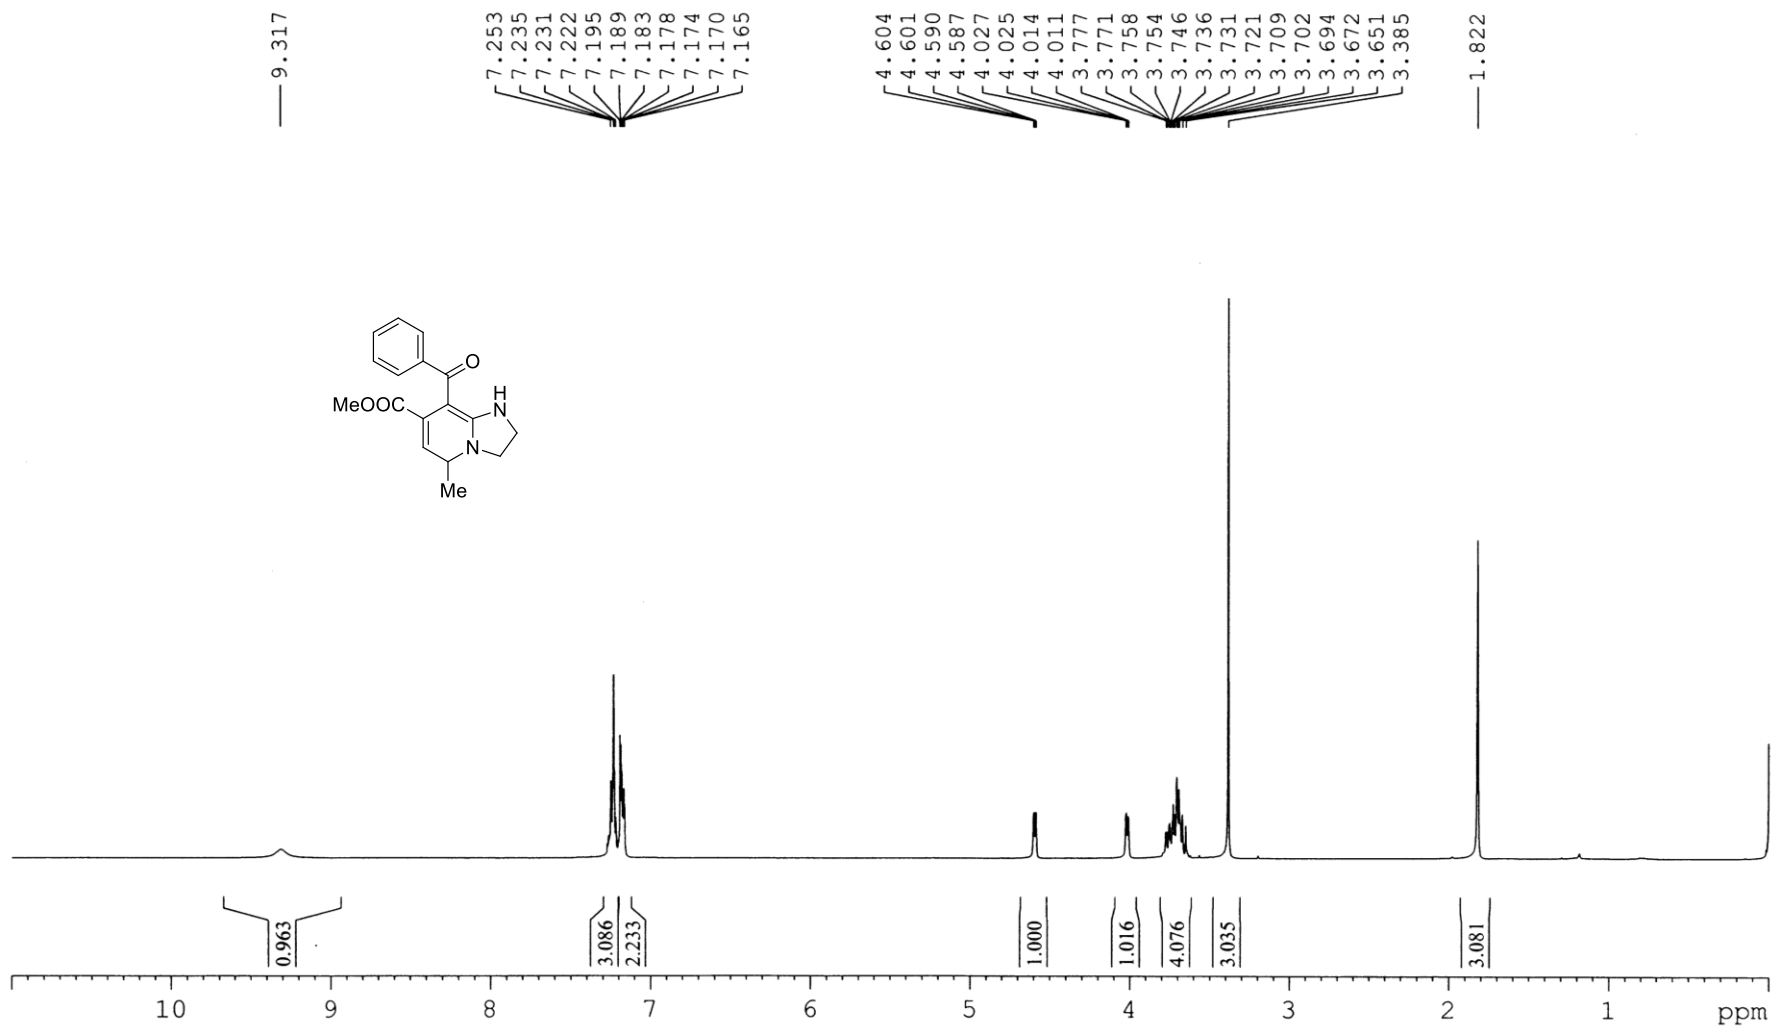

**Figure 51.** <sup>1</sup>H NMR (400 MHz, CDCl<sub>3</sub>) spectra of compound **8a**

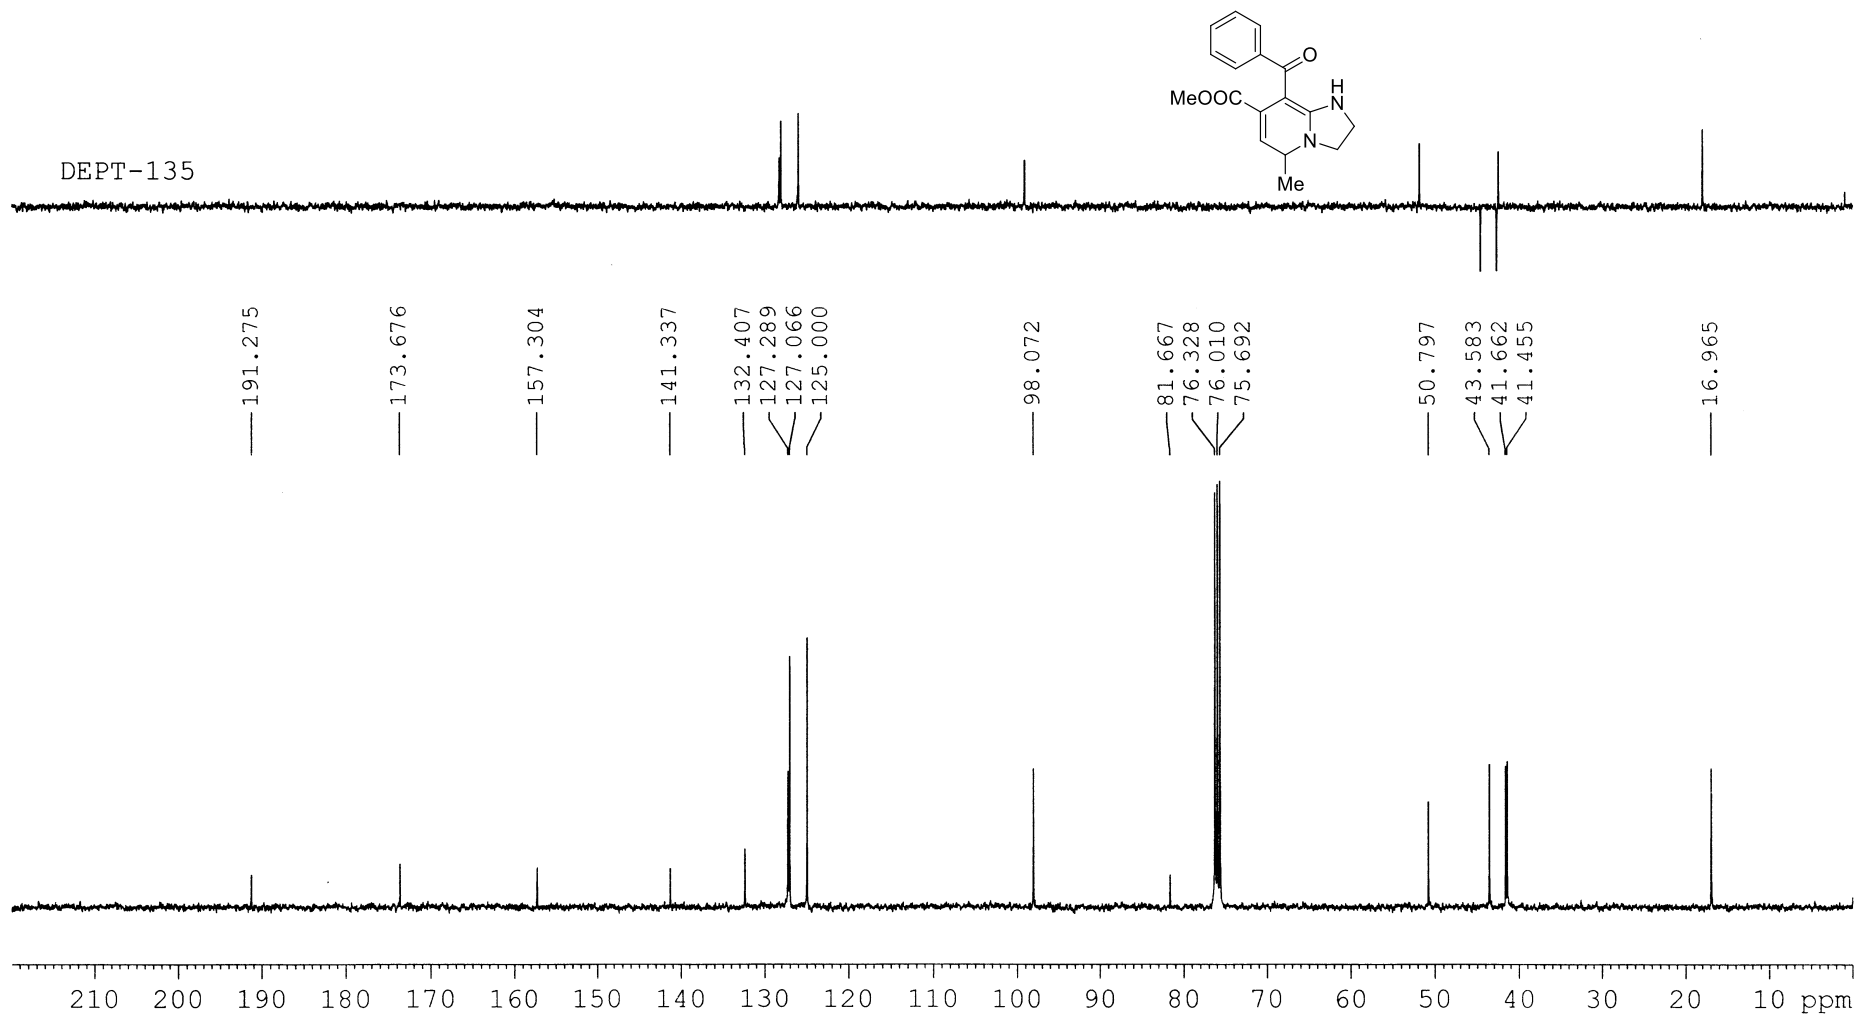

**Figure 52.**  $^{13}\text{C}$  NMR (100 MHz,  $\text{CDCl}_3$ ) spectra of compound **8a**

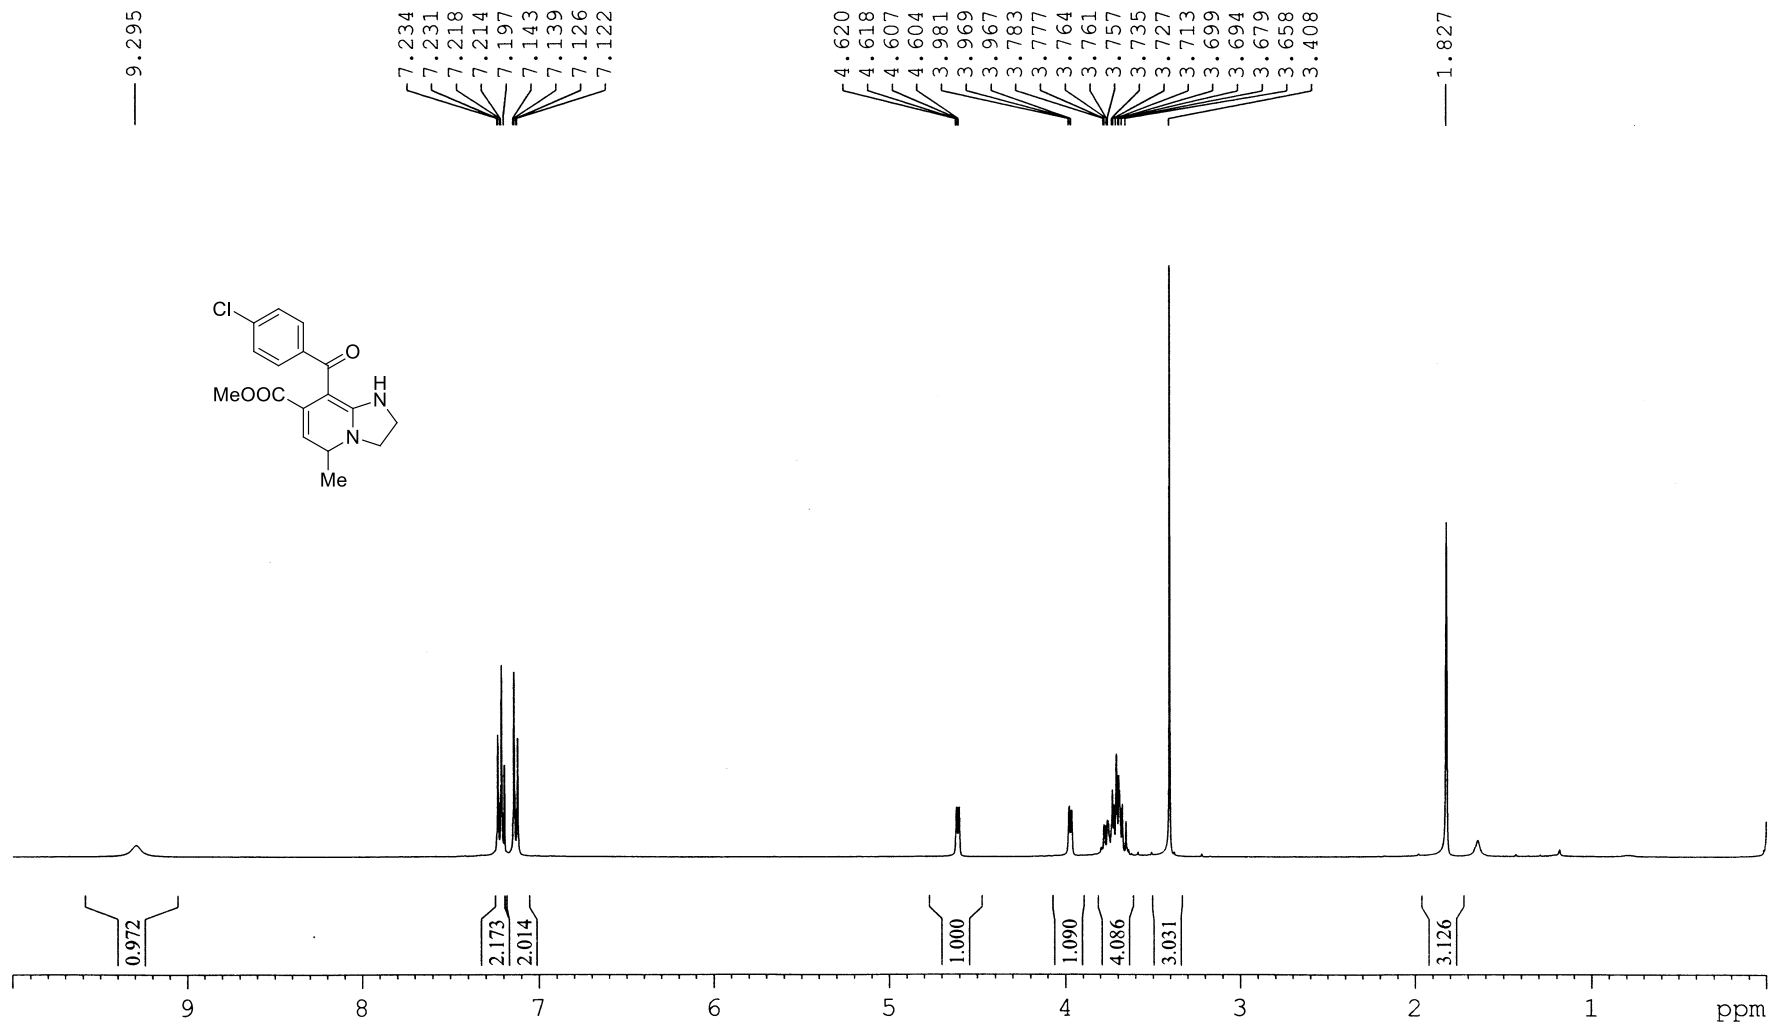

**Figure 53.** <sup>1</sup>H NMR (400 MHz, CDCl<sub>3</sub>) spectra of compound **8b**

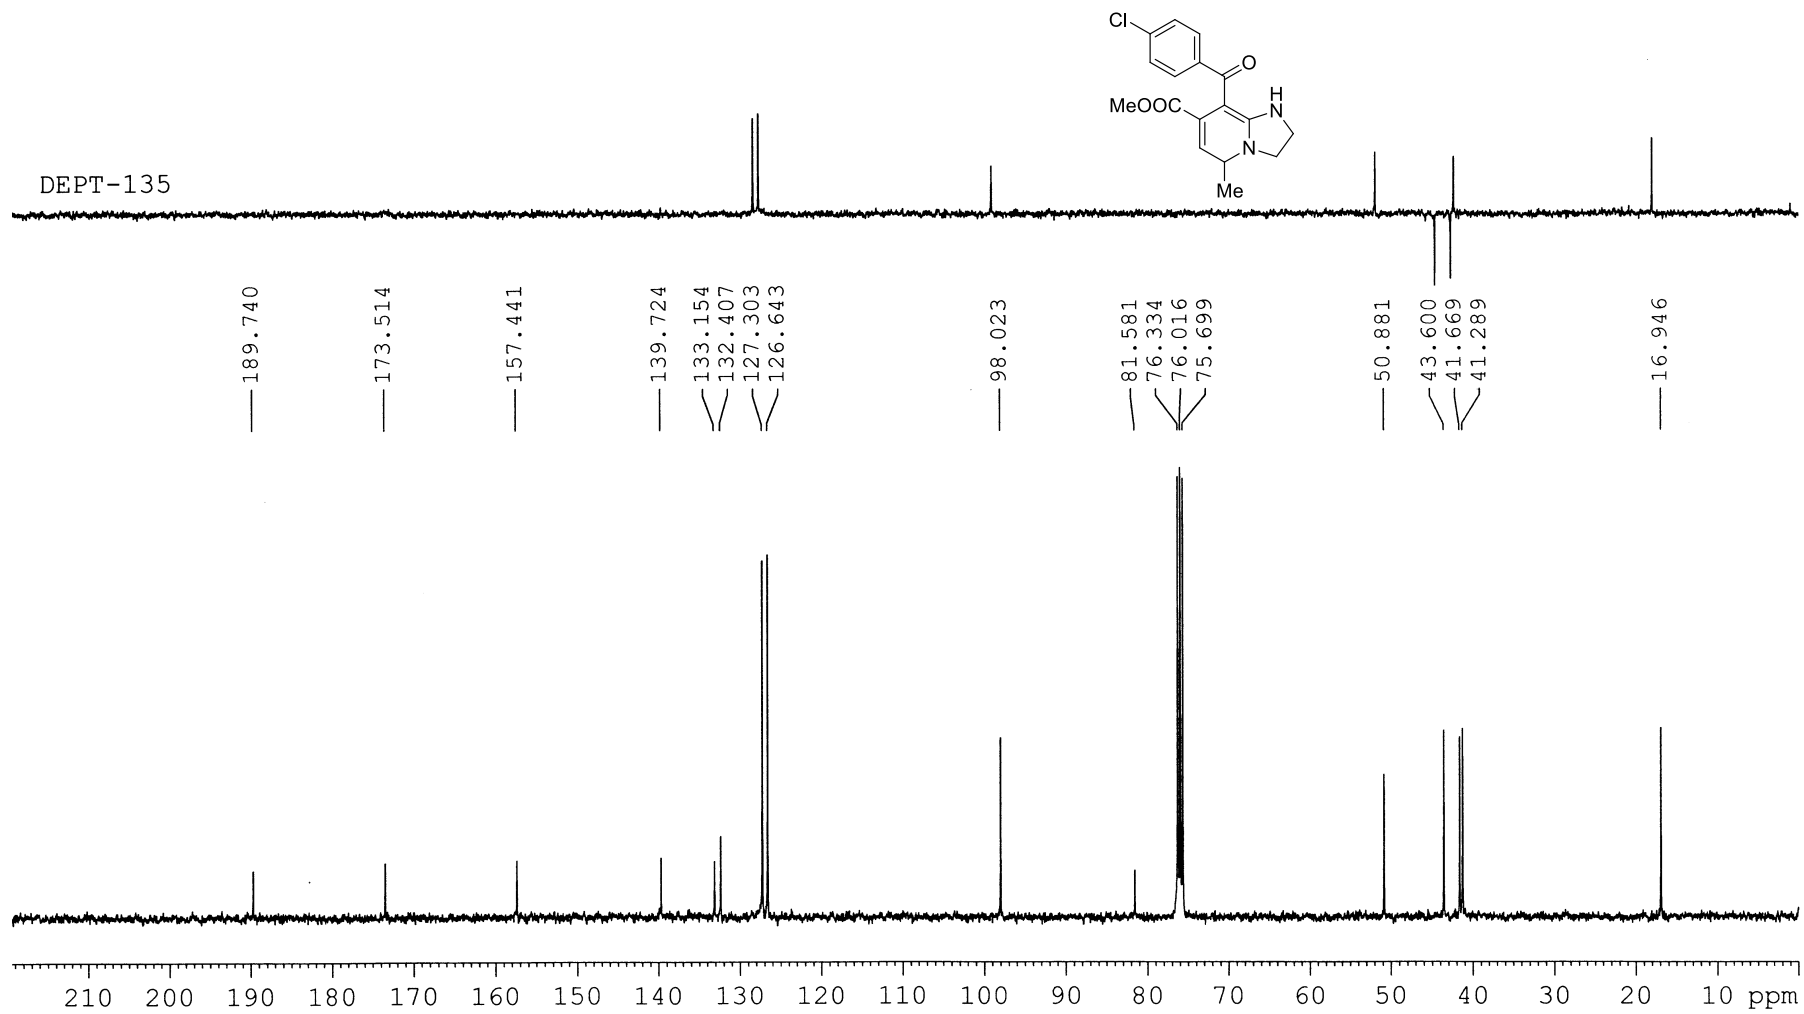

Figure 54.  $^{13}\text{C}$  NMR (100 MHz,  $\text{CDCl}_3$ ) spectra of compound **8b**

## References and Notes

1. (a) Huang, Z.-T.; Wang, M.-X. *Synthesis* **1992**, 12, 1273–1276. (b) Li, Z.-J.; Charles, D. *Synth. Commun.* **2001**, 31, 527–533.
2. CCDC 1052283 contain the supplementary crystallographic data for compound **5e**. CCDC 1052294 contain the supplementary crystallographic data for compound **7e**. These data can be obtained free of charge from The Cambridge Crystallographic Data Center via [www.ccdc.cam.ac.uk/data\\_request/cif](http://www.ccdc.cam.ac.uk/data_request/cif).
